# Supplementary material
Source: publisher figshare collection journal article supplement (https://geolsoc.figshare.com/ndownloader/files/14047760)
Supplement: Supplementary file 1 [file 14047760]

## Sheet: PlotDat3
Source sheet	Sheet1	380	4.8432e-08	401	0	380	0
Plot name	ProbDens1	380.06	5.10543e-08	404	0	499.94	0
Plot Type	16	380.12	5.38108e-08	404	1
1st free col	9	380.18	5.67079e-08	401	1
Sigma Level	2	380.24	5.97524e-08	401	0
Absolute Errs	TRUE	380.3	6.29513e-08	ErrBox	ErrBox
Symbol Type	1	380.36	6.63119e-08	422	0
Inverse Plot	FALSE	380.42	6.98419e-08	425	0
Color Plot	TRUE	380.48	7.35491e-08	425	1
3D plot	FALSE	380.54	7.7442e-08	422	1
Linear	FALSE	380.6	8.15292e-08	422	0
Data Range	W3:X105	380.66	8.58198e-08	ErrBox	ErrBox
Filled Symbols	TRUE	380.72	9.03231e-08	425	0
ConcAge	FALSE	380.78	9.50491e-08	428	0
ConcSwap	FALSE	380.84	1.00008e-07	428	1
1st Symbol-row	1	380.9	1.0521e-07	425	1
		380.96	1.10667e-07	425	0
		381.02	1.16391e-07	ErrBox	ErrBox
		381.08	1.22393e-07	437	0
		381.14	1.28685e-07	440	0
		381.2	1.35282e-07	440	1
		381.26	1.42196e-07	437	1
		381.32	1.49443e-07	437	0
		381.38	1.57036e-07	ErrBox	ErrBox
		381.44	1.64991e-07	446	0
		381.5	1.73324e-07	449	0
		381.56	1.82052e-07	449	4
		381.62	1.91191e-07	446	4
		381.68	2.00761e-07	446	0
		381.74	2.10779e-07	ErrBox	ErrBox
		381.8	2.21265e-07	449	0
		381.86	2.3224e-07	452	0
		381.92	2.43723e-07	452	2
		381.98	2.55738e-07	449	2
		382.04	2.68306e-07	449	0
		382.1	2.81452e-07	ErrBox	ErrBox
		382.16	2.95199e-07	452	0
		382.22	3.09573e-07	455	0
		382.28	3.246e-07	455	6
		382.34	3.40308e-07	452	6
		382.4	3.56724e-07	452	0
		382.46	3.73878e-07	ErrBox	ErrBox
		382.52	3.91801e-07	455	0
		382.58	4.10524e-07	458	0
		382.64	4.30079e-07	458	9
		382.7	4.50502e-07	455	9
		382.76	4.71826e-07	455	0
		382.82	4.94088e-07	ErrBox	ErrBox
		382.88	5.17326e-07	458	0
		382.94	5.41579e-07	461	0
		383	5.66888e-07	461	16
		383.06	5.93294e-07	458	16
		383.12	6.2084e-07	458	0
		383.18	6.49572e-07	ErrBox	ErrBox
		383.24	6.79536e-07	461	0
		383.3	7.10779e-07	464	0
		383.36	7.43352e-07	464	12
		383.42	7.77306e-07	461	12
		383.48	8.12693e-07	461	0
		383.54	8.49569e-07	ErrBox	ErrBox
		383.6	8.87991e-07	464	0
		383.66	9.28017e-07	467	0
		383.72	9.69707e-07	467	21
		383.78	1.01312e-06	464	21
		383.84	1.05833e-06	464	0
		383.9	1.1054e-06	ErrBox	ErrBox
		383.96	1.15439e-06	467	0
		384.02	1.20538e-06	470	0
		384.08	1.25845e-06	470	14
		384.14	1.31366e-06	467	14
		384.2	1.37109e-06	467	0
		384.26	1.43083e-06	ErrBox	ErrBox
		384.32	1.49296e-06	470	0
		384.38	1.55756e-06	473	0
		384.44	1.62472e-06	473	7
		384.5	1.69453e-06	470	7
		384.56	1.76709e-06	470	0
		384.62	1.84249e-06	ErrBox	ErrBox
		384.68	1.92083e-06	473	0
		384.74	2.00222e-06	476	0
		384.8	2.08675e-06	476	6
		384.86	2.17453e-06	473	6
		384.92	2.26569e-06	473	0
		384.98	2.36032e-06	ErrBox	ErrBox
		385.04	2.45856e-06	479	0
		385.1	2.56051e-06	482	0
		385.16	2.66631e-06	482	1
		385.22	2.77608e-06	479	1
		385.28	2.88995e-06	479	0
		385.34	3.00806e-06	ErrBox	ErrBox
		385.4	3.13054e-06	482	0
		385.46	3.25755e-06	485	0
		385.52	3.38922e-06	485	1
		385.58	3.5257e-06	482	1
		385.64	3.66715e-06	482	0
		385.7	3.81372e-06	ErrBox	ErrBox
		385.76	3.96559e-06
		385.82	4.12291e-06
		385.88	4.28585e-06
		385.94	4.45459e-06
		386	4.6293e-06
		386.06	4.81018e-06
		386.12	4.9974e-06
		386.18	5.19117e-06
		386.24	5.39167e-06
		386.3	5.5991e-06
		386.36	5.81368e-06
		386.42	6.03562e-06
		386.48	6.26512e-06
		386.54	6.50242e-06
		386.6	6.74773e-06
		386.66	7.00129e-06
		386.72	7.26333e-06
		386.78	7.53409e-06
		386.84	7.81382e-06
		386.9	8.10277e-06
		386.96	8.4012e-06
		387.02	8.70936e-06
		387.08	9.02753e-06
		387.14	9.35597e-06
		387.2	9.69496e-06
		387.26	1.00448e-05
		387.32	1.04057e-05
		387.38	1.07781e-05
		387.44	1.11622e-05
		387.5	1.15583e-05
		387.56	1.19668e-05
		387.62	1.23879e-05
		387.68	1.28219e-05
		387.74	1.32693e-05
		387.8	1.37303e-05
		387.86	1.42053e-05
		387.92	1.46946e-05
		387.98	1.51985e-05
		388.04	1.57175e-05
		388.1	1.62518e-05
		388.16	1.68019e-05
		388.22	1.73682e-05
		388.28	1.79509e-05
		388.34	1.85505e-05
		388.4	1.91673e-05
		388.46	1.98018e-05
		388.52	2.04544e-05
		388.58	2.11254e-05
		388.64	2.18154e-05
		388.7	2.25246e-05
		388.76	2.32535e-05
		388.82	2.40025e-05
		388.88	2.47721e-05
		388.94	2.55627e-05
		389	2.63747e-05
		389.06	2.72086e-05
		389.12	2.80649e-05
		389.18	2.89439e-05
		389.24	2.98461e-05
		389.3	3.0772e-05
		389.36	3.17221e-05
		389.42	3.26968e-05
		389.48	3.36966e-05
		389.54	3.4722e-05
		389.6	3.57735e-05
		389.66	3.68514e-05
		389.72	3.79564e-05
		389.78	3.90889e-05
		389.84	4.02494e-05
		389.9	4.14383e-05
		389.96	4.26563e-05
		390.02	4.39037e-05
		390.08	4.51811e-05
		390.14	4.64889e-05
		390.2	4.78278e-05
		390.26	4.91981e-05
		390.32	5.06003e-05
		390.38	5.20351e-05
		390.44	5.35028e-05
		390.5	5.5004e-05
		390.56	5.65392e-05
		390.62	5.81089e-05
		390.68	5.97135e-05
		390.74	6.13536e-05
		390.8	6.30297e-05
		390.86	6.47423e-05
		390.92	6.64918e-05
		390.98	6.82787e-05
		391.04	7.01036e-05
		391.1	7.19669e-05
		391.16	7.38691e-05
		391.22	7.58106e-05
		391.28	7.7792e-05
		391.34	7.98136e-05
		391.4	8.1876e-05
		391.46	8.39796e-05
		391.52	8.61249e-05
		391.58	8.83122e-05
		391.64	9.0542e-05
		391.7	9.28148e-05
		391.76	9.51309e-05
		391.82	9.74908e-05
		391.88	9.98949e-05
		391.94	0.000102343
		392	0.000104837
		392.06	0.000107376
		392.12	0.00010996
		392.18	0.000112591
		392.24	0.000115267
		392.3	0.000117991
		392.36	0.000120761
		392.42	0.000123579
		392.48	0.000126444
		392.54	0.000129357
		392.6	0.000132318
		392.66	0.000135327
		392.72	0.000138385
		392.78	0.000141491
		392.84	0.000144647
		392.9	0.000147851
		392.96	0.000151105
		393.02	0.000154408
		393.08	0.000157761
		393.14	0.000161163
		393.2	0.000164614
		393.26	0.000168116
		393.32	0.000171667
		393.38	0.000175268
		393.44	0.000178919
		393.5	0.00018262
		393.56	0.00018637
		393.62	0.00019017
		393.68	0.000194019
		393.74	0.000197918
		393.8	0.000201866
		393.86	0.000205864
		393.92	0.00020991
		393.98	0.000214005
		394.04	0.000218148
		394.1	0.00022234
		394.16	0.000226579
		394.22	0.000230866
		394.28	0.000235201
		394.34	0.000239582
		394.4	0.000244009
		394.46	0.000248483
		394.52	0.000253002
		394.58	0.000257567
		394.64	0.000262176
		394.7	0.000266829
		394.76	0.000271525
		394.82	0.000276264
		394.88	0.000281046
		394.94	0.000285869
		395	0.000290733
		395.06	0.000295638
		395.12	0.000300581
		395.18	0.000305564
		395.24	0.000310584
		395.3	0.000315641
		395.36	0.000320735
		395.42	0.000325863
		395.48	0.000331026
		395.54	0.000336223
		395.6	0.000341452
		395.66	0.000346712
		395.72	0.000352003
		395.78	0.000357322
		395.84	0.00036267
		395.9	0.000368045
		395.96	0.000373446
		396.02	0.000378872
		396.08	0.000384321
		396.14	0.000389792
		396.2	0.000395285
		396.26	0.000400797
		396.32	0.000406327
		396.38	0.000411874
		396.44	0.000417437
		396.5	0.000423014
		396.56	0.000428604
		396.62	0.000434206
		396.68	0.000439817
		396.74	0.000445436
		396.8	0.000451063
		396.86	0.000456694
		396.92	0.00046233
		396.98	0.000467967
		397.04	0.000473605
		397.1	0.000479242
		397.16	0.000484877
		397.22	0.000490506
		397.28	0.00049613
		397.34	0.000501746
		397.4	0.000507353
		397.46	0.000512948
		397.52	0.00051853
		397.58	0.000524098
		397.64	0.000529649
		397.7	0.000535182
		397.76	0.000540694
		397.82	0.000546185
		397.88	0.000551653
		397.94	0.000557094
		398	0.000562509
		398.06	0.000567894
		398.12	0.000573248
		398.18	0.000578569
		398.24	0.000583856
		398.3	0.000589106
		398.36	0.000594318
		398.42	0.000599489
		398.48	0.000604619
		398.54	0.000609704
		398.6	0.000614744
		398.66	0.000619736
		398.72	0.000624679
		398.78	0.000629571
		398.84	0.000634409
		398.9	0.000639193
		398.96	0.00064392
		399.02	0.000648588
		399.08	0.000653197
		399.14	0.000657743
		399.2	0.000662226
		399.26	0.000666643
		399.32	0.000670993
		399.38	0.000675274
		399.44	0.000679484
		399.5	0.000683623
		399.56	0.000687687
		399.62	0.000691676
		399.68	0.000695589
		399.74	0.000699422
		399.8	0.000703175
		399.86	0.000706847
		399.92	0.000710436
		399.98	0.00071394
		400.04	0.000717358
		400.1	0.000720688
		400.16	0.00072393
		400.22	0.000727081
		400.28	0.000730142
		400.34	0.000733109
		400.4	0.000735983
		400.46	0.000738761
		400.52	0.000741443
		400.58	0.000744028
		400.64	0.000746514
		400.7	0.000748901
		400.76	0.000751187
		400.82	0.000753371
		400.88	0.000755454
		400.94	0.000757432
		401	0.000759307
		401.06	0.000761077
		401.12	0.000762741
		401.18	0.000764298
		401.24	0.000765749
		401.3	0.000767102
		401.36	0.000768337
		401.42	0.000769463
		401.48	0.00077048
		401.54	0.000771388
		401.6	0.000772185
		401.66	0.000772872
		401.72	0.000773448
		401.78	0.000773913
		401.84	0.000774267
		401.9	0.000774509
		401.96	0.00077464
		402.02	0.00077466
		402.08	0.000774568
		402.14	0.000774365
		402.2	0.00077405
		402.26	0.000773625
		402.32	0.000773088
		402.38	0.00077244
		402.44	0.000771682
		402.5	0.000770814
		402.56	0.000769836
		402.62	0.000768748
		402.68	0.000767552
		402.74	0.000766247
		402.8	0.000764834
		402.86	0.000763315
		402.92	0.000761688
		402.98	0.000759956
		403.04	0.000758119
		403.1	0.000756178
		403.16	0.000754133
		403.22	0.000751985
		403.28	0.000749736
		403.34	0.000747386
		403.4	0.000744936
		403.46	0.000742388
		403.52	0.000739742
		403.58	0.000737009
		403.64	0.000734172
		403.7	0.000731241
		403.76	0.000728217
		403.82	0.000725102
		403.88	0.000721896
		403.94	0.000718601
		404	0.000715219
		404.06	0.00071175
		404.12	0.000708197
		404.18	0.000704561
		404.24	0.000700843
		404.3	0.000697044
		404.36	0.000693167
		404.42	0.000689213
		404.48	0.000685183
		404.54	0.00068108
		404.6	0.000676904
		404.66	0.000672657
		404.72	0.000668342
		404.78	0.00066396
		404.84	0.000659512
		404.9	0.000655001
		404.96	0.000650427
		405.02	0.000645794
		405.08	0.000641102
		405.14	0.000636354
		405.2	0.000631551
		405.26	0.000626696
		405.32	0.000621789
		405.38	0.000616833
		405.44	0.000611831
		405.5	0.000606782
		405.56	0.000601691
		405.62	0.000596557
		405.68	0.000591384
		405.74	0.000586174
		405.8	0.000580927
		405.86	0.000575646
		405.92	0.000570334
		405.98	0.000564991
		406.04	0.00055962
		406.1	0.000554222
		406.16	0.0005488
		406.22	0.000543356
		406.28	0.000537891
		406.34	0.000532407
		406.4	0.000526906
		406.46	0.00052139
		406.52	0.00051586
		406.58	0.00051032
		406.64	0.00050477
		406.7	0.000499212
		406.76	0.000493648
		406.82	0.00048808
		406.88	0.00048251
		406.94	0.00047694
		407	0.000471371
		407.06	0.000465804
		407.12	0.000460243
		407.18	0.000454688
		407.24	0.000449141
		407.3	0.000443605
		407.36	0.000438079
		407.42	0.000432567
		407.48	0.00042707
		407.54	0.00042159
		407.6	0.000416127
		407.66	0.000410684
		407.72	0.000405262
		407.78	0.000399863
		407.84	0.000394488
		407.9	0.00038914
		407.96	0.000383818
		408.02	0.000378525
		408.08	0.000373262
		408.14	0.000368031
		408.2	0.000362833
		408.26	0.000357669
		408.32	0.000352541
		408.38	0.00034745
		408.44	0.000342397
		408.5	0.000337384
		408.56	0.000332412
		408.62	0.000327482
		408.68	0.000322595
		408.74	0.000317753
		408.8	0.000312957
		408.86	0.000308208
		408.92	0.000303507
		408.98	0.000298855
		409.04	0.000294254
		409.1	0.000289704
		409.16	0.000285206
		409.22	0.000280763
		409.28	0.000276373
		409.34	0.00027204
		409.4	0.000267763
		409.46	0.000263544
		409.52	0.000259383
		409.58	0.000255282
		409.64	0.000251242
		409.7	0.000247263
		409.76	0.000243346
		409.82	0.000239493
		409.88	0.000235703
		409.94	0.000231979
		410	0.00022832
		410.06	0.000224728
		410.12	0.000221204
		410.18	0.000217748
		410.24	0.000214361
		410.3	0.000211044
		410.36	0.000207798
		410.42	0.000204623
		410.48	0.00020152
		410.54	0.000198491
		410.6	0.000195535
		410.66	0.000192654
		410.72	0.000189849
		410.78	0.000187119
		410.84	0.000184466
		410.9	0.000181891
		410.96	0.000179394
		411.02	0.000176975
		411.08	0.000174637
		411.14	0.000172379
		411.2	0.000170202
		411.26	0.000168108
		411.32	0.000166095
		411.38	0.000164167
		411.44	0.000162322
		411.5	0.000160562
		411.56	0.000158888
		411.62	0.0001573
		411.68	0.000155799
		411.74	0.000154385
		411.8	0.000153061
		411.86	0.000151825
		411.92	0.00015068
		411.98	0.000149625
		412.04	0.000148662
		412.1	0.000147791
		412.16	0.000147014
		412.22	0.00014633
		412.28	0.000145741
		412.34	0.000145247
		412.4	0.00014485
		412.46	0.00014455
		412.52	0.000144348
		412.58	0.000144244
		412.64	0.000144241
		412.7	0.000144337
		412.76	0.000144535
		412.82	0.000144835
		412.88	0.000145238
		412.94	0.000145746
		413	0.000146357
		413.06	0.000147075
		413.12	0.000147899
		413.18	0.000148831
		413.24	0.000149871
		413.3	0.00015102
		413.36	0.000152279
		413.42	0.00015365
		413.48	0.000155133
		413.54	0.000156729
		413.6	0.000158438
		413.66	0.000160263
		413.72	0.000162204
		413.78	0.000164261
		413.84	0.000166436
		413.9	0.00016873
		413.96	0.000171143
		414.02	0.000173677
		414.08	0.000176333
		414.14	0.000179111
		414.2	0.000182012
		414.26	0.000185038
		414.32	0.000188189
		414.38	0.000191466
		414.44	0.000194871
		414.5	0.000198403
		414.56	0.000202065
		414.62	0.000205856
		414.68	0.000209778
		414.74	0.000213831
		414.8	0.000218017
		414.86	0.000222336
		414.92	0.000226788
		414.98	0.000231376
		415.04	0.000236099
		415.1	0.000240959
		415.16	0.000245955
		415.22	0.00025109
		415.28	0.000256362
		415.34	0.000261774
		415.4	0.000267325
		415.46	0.000273017
		415.52	0.000278849
		415.58	0.000284822
		415.64	0.000290937
		415.7	0.000297195
		415.76	0.000303594
		415.82	0.000310137
		415.88	0.000316823
		415.94	0.000323652
		416	0.000330625
		416.06	0.000337742
		416.12	0.000345003
		416.18	0.000352408
		416.24	0.000359957
		416.3	0.00036765
		416.36	0.000375486
		416.42	0.000383467
		416.48	0.00039159
		416.54	0.000399857
		416.6	0.000408267
		416.66	0.00041682
		416.72	0.000425514
		416.78	0.000434349
		416.84	0.000443326
		416.9	0.000452442
		416.96	0.000461698
		417.02	0.000471092
		417.08	0.000480624
		417.14	0.000490292
		417.2	0.000500095
		417.26	0.000510033
		417.32	0.000520104
		417.38	0.000530307
		417.44	0.00054064
		417.5	0.000551101
		417.56	0.00056169
		417.62	0.000572405
		417.68	0.000583243
		417.74	0.000594203
		417.8	0.000605284
		417.86	0.000616482
		417.92	0.000627796
		417.98	0.000639224
		418.04	0.000650763
		418.1	0.000662411
		418.16	0.000674166
		418.22	0.000686025
		418.28	0.000697984
		418.34	0.000710043
		418.4	0.000722197
		418.46	0.000734444
		418.52	0.00074678
		418.58	0.000759203
		418.64	0.00077171
		418.7	0.000784296
		418.76	0.000796959
		418.82	0.000809695
		418.88	0.000822501
		418.94	0.000835372
		419	0.000848306
		419.06	0.000861298
		419.12	0.000874344
		419.18	0.000887441
		419.24	0.000900584
		419.3	0.000913769
		419.36	0.000926992
		419.42	0.000940249
		419.48	0.000953534
		419.54	0.000966845
		419.6	0.000980175
		419.66	0.000993521
		419.72	0.00100688
		419.78	0.00102024
		419.84	0.0010336
		419.9	0.00104697
		419.96	0.00106032
		420.02	0.00107366
		420.08	0.00108698
		420.14	0.00110027
		420.2	0.00111354
		420.26	0.00112678
		420.32	0.00113997
		420.38	0.00115312
		420.44	0.00116622
		420.5	0.00117927
		420.56	0.00119226
		420.62	0.00120518
		420.68	0.00121803
		420.74	0.0012308
		420.8	0.0012435
		420.86	0.0012561
		420.92	0.00126861
		420.98	0.00128103
		421.04	0.00129334
		421.1	0.00130555
		421.16	0.00131764
		421.22	0.00132961
		421.28	0.00134145
		421.34	0.00135317
		421.4	0.00136475
		421.46	0.00137619
		421.52	0.00138748
		421.58	0.00139863
		421.64	0.00140961
		421.7	0.00142044
		421.76	0.0014311
		421.82	0.00144159
		421.88	0.0014519
		421.94	0.00146203
		422	0.00147198
		422.06	0.00148173
		422.12	0.00149129
		422.18	0.00150065
		422.24	0.00150981
		422.3	0.00151876
		422.36	0.00152749
		422.42	0.00153601
		422.48	0.0015443
		422.54	0.00155237
		422.6	0.00156021
		422.66	0.00156782
		422.72	0.00157519
		422.78	0.00158232
		422.84	0.0015892
		422.9	0.00159584
		422.96	0.00160223
		423.02	0.00160836
		423.08	0.00161424
		423.14	0.00161985
		423.2	0.00162521
		423.26	0.0016303
		423.32	0.00163512
		423.38	0.00163967
		423.44	0.00164395
		423.5	0.00164796
		423.56	0.00165168
		423.62	0.00165514
		423.68	0.00165831
		423.74	0.0016612
		423.8	0.00166381
		423.86	0.00166613
		423.92	0.00166817
		423.98	0.00166994
		424.04	0.00167141
		424.1	0.00167259
		424.16	0.00167349
		424.22	0.0016741
		424.28	0.00167442
		424.34	0.00167446
		424.4	0.00167421
		424.46	0.00167367
		424.52	0.00167284
		424.58	0.00167173
		424.64	0.00167033
		424.7	0.00166865
		424.76	0.00166669
		424.82	0.00166445
		424.88	0.00166192
		424.94	0.00165912
		425	0.00165604
		425.06	0.00165269
		425.12	0.00164906
		425.18	0.00164516
		425.24	0.00164099
		425.3	0.00163656
		425.36	0.00163186
		425.42	0.0016269
		425.48	0.00162169
		425.54	0.00161621
		425.6	0.00161049
		425.66	0.00160452
		425.72	0.0015983
		425.78	0.00159182
		425.84	0.00158512
		425.9	0.00157819
		425.96	0.00157102
		426.02	0.00156362
		426.08	0.001556
		426.14	0.00154816
		426.2	0.00154011
		426.26	0.00153184
		426.32	0.00152337
		426.38	0.00151469
		426.44	0.00150581
		426.5	0.00149674
		426.56	0.00148748
		426.62	0.00147804
		426.68	0.00146842
		426.74	0.00145862
		426.8	0.00144865
		426.86	0.00143852
		426.92	0.00142823
		426.98	0.00141778
		427.04	0.00140718
		427.1	0.00139644
		427.16	0.00138556
		427.22	0.00137454
		427.28	0.0013634
		427.34	0.00135213
		427.4	0.00134075
		427.46	0.00132925
		427.52	0.00131765
		427.58	0.00130594
		427.64	0.00129415
		427.7	0.00128225
		427.76	0.00127027
		427.82	0.00125822
		427.88	0.00124608
		427.94	0.00123388
		428	0.00122162
		428.06	0.0012093
		428.12	0.00119693
		428.18	0.00118451
		428.24	0.00117205
		428.3	0.00115955
		428.36	0.00114702
		428.42	0.00113447
		428.48	0.00112191
		428.54	0.00110933
		428.6	0.00109674
		428.66	0.00108414
		428.72	0.00107156
		428.78	0.00105898
		428.84	0.00104641
		428.9	0.00103387
		428.96	0.00102135
		429.02	0.00100886
		429.08	0.000996405
		429.14	0.000983993
		429.2	0.000971627
		429.26	0.000959313
		429.32	0.000947066
		429.38	0.000934872
		429.44	0.000922746
		429.5	0.000910693
		429.56	0.000898718
		429.62	0.000886826
		429.68	0.000875023
		429.74	0.000863313
		429.8	0.000851702
		429.86	0.000840195
		429.92	0.000828796
		429.98	0.000817511
		430.04	0.000806345
		430.1	0.000795303
		430.16	0.00078439
		430.22	0.00077361
		430.28	0.00076297
		430.34	0.000752472
		430.4	0.000742123
		430.46	0.000731928
		430.52	0.00072189
		430.58	0.000712015
		430.64	0.000702308
		430.7	0.000692773
		430.76	0.000683416
		430.82	0.00067424
		430.88	0.00066525
		430.94	0.000656452
		431	0.000647849
		431.06	0.000639446
		431.12	0.000631249
		431.18	0.00062326
		431.24	0.000615486
		431.3	0.000607929
		431.36	0.000600595
		431.42	0.000593488
		431.48	0.000586612
		431.54	0.000579972
		431.6	0.000573571
		431.66	0.000567415
		431.72	0.000561506
		431.78	0.000555849
		431.84	0.000550449
		431.9	0.000545308
		431.96	0.000540431
		432.02	0.000535822
		432.08	0.000531484
		432.14	0.000527421
		432.2	0.000523636
		432.26	0.000520134
		432.32	0.000516916
		432.38	0.000513988
		432.44	0.000511351
		432.5	0.000509009
		432.56	0.000506964
		432.62	0.00050522
		432.68	0.00050378
		432.74	0.000502645
		432.8	0.000501818
		432.86	0.000501301
		432.92	0.000501098
		432.98	0.000501208
		433.04	0.000501635
		433.1	0.00050238
		433.16	0.000503444
		433.22	0.000504829
		433.28	0.000506535
		433.34	0.000508564
		433.4	0.000510915
		433.46	0.000513591
		433.52	0.00051659
		433.58	0.000519924
		433.64	0.000523571
		433.7	0.000527542
		433.76	0.000531835
		433.82	0.00053645
		433.88	0.000541385
		433.94	0.000546639
		434	0.000552209
		434.06	0.000558095
		434.12	0.000564294
		434.18	0.000570803
		434.24	0.000577619
		434.3	0.00058474
		434.36	0.000592161
		434.42	0.000599879
		434.48	0.000607891
		434.54	0.000616191
		434.6	0.000624775
		434.66	0.000633638
		434.72	0.000642776
		434.78	0.000652182
		434.84	0.00066185
		434.9	0.000671775
		434.96	0.000681951
		435.02	0.000692369
		435.08	0.000703024
		435.14	0.000713909
		435.2	0.000725014
		435.26	0.000736334
		435.32	0.000747859
		435.38	0.000759582
		435.44	0.000771493
		435.5	0.000783583
		435.56	0.000795844
		435.62	0.000808267
		435.68	0.00082084
		435.74	0.000833556
		435.8	0.000846403
		435.86	0.000859372
		435.92	0.000872452
		435.98	0.000885642
		436.04	0.000898913
		436.1	0.000912263
		436.16	0.000925681
		436.22	0.000939157
		436.28	0.000952678
		436.34	0.000966233
		436.4	0.000979823
		436.46	0.000993415
		436.52	0.00100701
		436.58	0.00102059
		436.64	0.00103415
		436.7	0.00104768
		436.76	0.00106116
		436.82	0.00107459
		436.88	0.00108795
		436.94	0.00110123
		437	0.00111443
		437.06	0.00112752
		437.12	0.00114051
		437.18	0.00115338
		437.24	0.00116611
		437.3	0.00117871
		437.36	0.00119116
		437.42	0.00120345
		437.48	0.00121557
		437.54	0.00122752
		437.6	0.00123928
		437.66	0.00125085
		437.72	0.00126223
		437.78	0.0012734
		437.84	0.00128436
		437.9	0.0012951
		437.96	0.00130561
		438.02	0.0013159
		438.08	0.00132595
		438.14	0.00133576
		438.2	0.00134534
		438.26	0.00135468
		438.32	0.00136376
		438.38	0.0013726
		438.44	0.00138119
		438.5	0.00138954
		438.56	0.00139764
		438.62	0.00140549
		438.68	0.0014131
		438.74	0.00142046
		438.8	0.00142759
		438.86	0.00143449
		438.92	0.00144116
		438.98	0.00144761
		439.04	0.00145385
		439.1	0.00145987
		439.16	0.0014657
		439.22	0.00147135
		439.28	0.00147681
		439.34	0.00148211
		439.4	0.00148725
		439.46	0.00149225
		439.52	0.00149712
		439.58	0.00150189
		439.64	0.00150655
		439.7	0.00151114
		439.76	0.00151567
		439.82	0.00152016
		439.88	0.00152464
		439.94	0.00152911
		440	0.0015336
		440.06	0.00153814
		440.12	0.00154275
		440.18	0.00154747
		440.24	0.0015523
		440.3	0.00155728
		440.36	0.00156244
		440.42	0.0015678
		440.48	0.0015734
		440.54	0.00157928
		440.6	0.00158545
		440.66	0.00159196
		440.72	0.00159883
		440.78	0.00160611
		440.84	0.00161383
		440.9	0.00162203
		440.96	0.00163075
		441.02	0.00164001
		441.08	0.00164986
		441.14	0.00166034
		441.2	0.00167149
		441.26	0.00168334
		441.32	0.00169594
		441.38	0.00170935
		441.44	0.00172357
		441.5	0.00173866
		441.56	0.00175466
		441.62	0.00177161
		441.68	0.00178955
		441.74	0.00180852
		441.8	0.00182856
		441.86	0.00184971
		441.92	0.00187201
		441.98	0.00189549
		442.04	0.00192019
		442.1	0.00194614
		442.16	0.00197338
		442.22	0.00200194
		442.28	0.00203185
		442.34	0.00206313
		442.4	0.00209581
		442.46	0.00212992
		442.52	0.00216548
		442.58	0.00220251
		442.64	0.00224102
		442.7	0.00228103
		442.76	0.00232255
		442.82	0.00236559
		442.88	0.00241015
		442.94	0.00245623
		443	0.00250383
		443.06	0.00255295
		443.12	0.00260357
		443.18	0.0026557
		443.24	0.00270929
		443.3	0.00276435
		443.36	0.00282083
		443.42	0.00287872
		443.48	0.00293798
		443.54	0.00299857
		443.6	0.00306045
		443.66	0.00312358
		443.72	0.00318792
		443.78	0.00325342
		443.84	0.00332002
		443.9	0.00338764
		443.96	0.00345623
		444.02	0.00352573
		444.08	0.00359607
		444.14	0.00366717
		444.2	0.00373897
		444.26	0.00381139
		444.32	0.00388434
		444.38	0.00395775
		444.44	0.00403153
		444.5	0.00410561
		444.56	0.00417988
		444.62	0.00425427
		444.68	0.00432869
		444.74	0.00440307
		444.8	0.00447729
		444.86	0.00455129
		444.92	0.00462497
		444.98	0.00469826
		445.04	0.00477105
		445.1	0.00484329
		445.16	0.00491488
		445.22	0.00498577
		445.28	0.00505588
		445.34	0.00512511
		445.4	0.00519341
		445.46	0.00526072
		445.52	0.005327
		445.58	0.00539216
		445.64	0.00545616
		445.7	0.00551897
		445.76	0.00558054
		445.82	0.00564084
		445.88	0.00569983
		445.94	0.0057575
		446	0.00581382
		446.06	0.00586877
		446.12	0.00592237
		446.18	0.00597459
		446.24	0.00602545
		446.3	0.00607497
		446.36	0.00612313
		446.42	0.00616997
		446.48	0.00621552
		446.54	0.00625981
		446.6	0.00630288
		446.66	0.00634476
		446.72	0.0063855
		446.78	0.00642517
		446.84	0.00646381
		446.9	0.00650148
		446.96	0.00653826
		447.02	0.00657419
		447.08	0.00660936
		447.14	0.00664384
		447.2	0.00667771
		447.26	0.00671105
		447.32	0.00674395
		447.38	0.00677649
		447.44	0.00680876
		447.5	0.00684084
		447.56	0.00687282
		447.62	0.0069048
		447.68	0.00693686
		447.74	0.0069691
		447.8	0.0070016
		447.86	0.00703446
		447.92	0.00706776
		447.98	0.0071016
		448.04	0.00713607
		448.1	0.00717124
		448.16	0.00720721
		448.22	0.00724407
		448.28	0.00728188
		448.34	0.00732074
		448.4	0.00736073
		448.46	0.0074019
		448.52	0.00744435
		448.58	0.00748814
		448.64	0.00753334
		448.7	0.00758001
		448.76	0.00762822
		448.82	0.00767803
		448.88	0.0077295
		448.94	0.0077827
		449	0.00783766
		449.06	0.00789445
		449.12	0.00795309
		449.18	0.00801365
		449.24	0.00807617
		449.3	0.00814069
		449.36	0.00820724
		449.42	0.00827587
		449.48	0.0083466
		449.54	0.00841948
		449.6	0.00849452
		449.66	0.00857177
		449.72	0.00865125
		449.78	0.00873301
		449.84	0.00881702
		449.9	0.00890334
		449.96	0.008992
		450.02	0.00908299
		450.08	0.00917638
		450.14	0.00927214
		450.2	0.00937032
		450.26	0.00947091
		450.32	0.00957393
		450.38	0.00967942
		450.44	0.0097874
		450.5	0.00989786
		450.56	0.0100108
		450.62	0.0101263
		450.68	0.0102443
		450.74	0.0103649
		450.8	0.0104881
		450.86	0.0106138
		450.92	0.0107421
		450.98	0.010873
		451.04	0.0110066
		451.1	0.0111428
		451.16	0.0112816
		451.22	0.0114231
		451.28	0.0115672
		451.34	0.0117141
		451.4	0.0118636
		451.46	0.0120159
		451.52	0.0121708
		451.58	0.0123285
		451.64	0.0124889
		451.7	0.012652
		451.76	0.0128178
		451.82	0.0129864
		451.88	0.0131577
		451.94	0.0133318
		452	0.0135085
		452.06	0.013688
		452.12	0.0138702
		452.18	0.0140552
		452.24	0.0142428
		452.3	0.0144331
		452.36	0.014626
		452.42	0.0148216
		452.48	0.0150199
		452.54	0.0152207
		452.6	0.0154241
		452.66	0.0156301
		452.72	0.0158386
		452.78	0.0160496
		452.84	0.016263
		452.9	0.0164788
		452.96	0.016697
		453.02	0.0169175
		453.08	0.0171402
		453.14	0.0173653
		453.2	0.0175924
		453.26	0.0178217
		453.32	0.0180531
		453.38	0.0182864
		453.44	0.0185217
		453.5	0.0187589
		453.56	0.0189979
		453.62	0.0192386
		453.68	0.019481
		453.74	0.0197251
		453.8	0.0199707
		453.86	0.0202178
		453.92	0.0204663
		453.98	0.0207162
		454.04	0.0209673
		454.1	0.0212196
		454.16	0.0214731
		454.22	0.0217277
		454.28	0.0219833
		454.34	0.0222398
		454.4	0.0224972
		454.46	0.0227554
		454.52	0.0230144
		454.58	0.0232741
		454.64	0.0235344
		454.7	0.0237953
		454.76	0.0240568
		454.82	0.0243187
		454.88	0.024581
		454.94	0.0248437
		455	0.0251068
		455.06	0.0253701
		455.12	0.0256337
		455.18	0.0258975
		455.24	0.0261615
		455.3	0.0264256
		455.36	0.0266898
		455.42	0.0269541
		455.48	0.0272185
		455.54	0.0274828
		455.6	0.0277471
		455.66	0.0280114
		455.72	0.0282757
		455.78	0.0285398
		455.84	0.0288039
		455.9	0.0290678
		455.96	0.0293316
		456.02	0.0295953
		456.08	0.0298587
		456.14	0.030122
		456.2	0.030385
		456.26	0.0306478
		456.32	0.0309103
		456.38	0.0311725
		456.44	0.0314345
		456.5	0.0316961
		456.56	0.0319574
		456.62	0.0322183
		456.68	0.0324788
		456.74	0.0327389
		456.8	0.0329985
		456.86	0.0332577
		456.92	0.0335163
		456.98	0.0337744
		457.04	0.034032
		457.1	0.0342889
		457.16	0.0345452
		457.22	0.0348008
		457.28	0.0350557
		457.34	0.0353098
		457.4	0.0355631
		457.46	0.0358156
		457.52	0.0360672
		457.58	0.0363178
		457.64	0.0365675
		457.7	0.0368161
		457.76	0.0370636
		457.82	0.0373101
		457.88	0.0375553
		457.94	0.0377993
		458	0.0380421
		458.06	0.0382836
		458.12	0.0385237
		458.18	0.0387624
		458.24	0.0389996
		458.3	0.0392353
		458.36	0.0394695
		458.42	0.0397021
		458.48	0.0399331
		458.54	0.0401625
		458.6	0.0403901
		458.66	0.040616
		458.72	0.0408401
		458.78	0.0410624
		458.84	0.0412829
		458.9	0.0415016
		458.96	0.0417184
		459.02	0.0419332
		459.08	0.0421462
		459.14	0.0423572
		459.2	0.0425663
		459.26	0.0427734
		459.32	0.0429785
		459.38	0.0431817
		459.44	0.0433829
		459.5	0.0435821
		459.56	0.0437793
		459.62	0.0439746
		459.68	0.0441679
		459.74	0.0443592
		459.8	0.0445486
		459.86	0.044736
		459.92	0.0449216
		459.98	0.0451052
		460.04	0.0452869
		460.1	0.0454668
		460.16	0.0456448
		460.22	0.045821
		460.28	0.0459954
		460.34	0.0461679
		460.4	0.0463388
		460.46	0.0465078
		460.52	0.0466752
		460.58	0.0468409
		460.64	0.0470049
		460.7	0.0471672
		460.76	0.0473279
		460.82	0.047487
		460.88	0.0476446
		460.94	0.0478005
		461	0.0479549
		461.06	0.0481077
		461.12	0.048259
		461.18	0.0484088
		461.24	0.0485571
		461.3	0.0487039
		461.36	0.0488491
		461.42	0.0489929
		461.48	0.0491352
		461.54	0.0492759
		461.6	0.0494151
		461.66	0.0495528
		461.72	0.049689
		461.78	0.0498236
		461.84	0.0499565
		461.9	0.0500879
		461.96	0.0502177
		462.02	0.0503457
		462.08	0.0504721
		462.14	0.0505967
		462.2	0.0507195
		462.26	0.0508405
		462.32	0.0509595
		462.38	0.0510767
		462.44	0.0511918
		462.5	0.0513049
		462.56	0.0514158
		462.62	0.0515246
		462.68	0.051631
		462.74	0.0517352
		462.8	0.0518369
		462.86	0.0519361
		462.92	0.0520327
		462.98	0.0521267
		463.04	0.0522179
		463.1	0.0523062
		463.16	0.0523917
		463.22	0.0524741
		463.28	0.0525533
		463.34	0.0526294
		463.4	0.0527021
		463.46	0.0527714
		463.52	0.0528372
		463.58	0.0528993
		463.64	0.0529578
		463.7	0.0530124
		463.76	0.0530631
		463.82	0.0531098
		463.88	0.0531523
		463.94	0.0531907
		464	0.0532247
		464.06	0.0532543
		464.12	0.0532794
		464.18	0.0532999
		464.24	0.0533157
		464.3	0.0533268
		464.36	0.053333
		464.42	0.0533343
		464.48	0.0533306
		464.54	0.0533218
		464.6	0.0533078
		464.66	0.0532886
		464.72	0.0532642
		464.78	0.0532345
		464.84	0.0531993
		464.9	0.0531588
		464.96	0.0531128
		465.02	0.0530613
		465.08	0.0530042
		465.14	0.0529416
		465.2	0.0528735
		465.26	0.0527998
		465.32	0.0527205
		465.38	0.0526356
		465.44	0.0525451
		465.5	0.0524491
		465.56	0.0523475
		465.62	0.0522404
		465.68	0.0521279
		465.74	0.0520098
		465.8	0.0518864
		465.86	0.0517576
		465.92	0.0516235
		465.98	0.0514841
		466.04	0.0513396
		466.1	0.0511899
		466.16	0.0510352
		466.22	0.0508756
		466.28	0.0507111
		466.34	0.0505418
		466.4	0.0503678
		466.46	0.0501892
		466.52	0.0500062
		466.58	0.0498188
		466.64	0.0496272
		466.7	0.0494314
		466.76	0.0492315
		466.82	0.0490278
		466.88	0.0488203
		466.94	0.0486091
		467	0.0483944
		467.06	0.0481762
		467.12	0.0479548
		467.18	0.0477302
		467.24	0.0475026
		467.3	0.0472722
		467.36	0.0470389
		467.42	0.046803
		467.48	0.0465646
		467.54	0.0463238
		467.6	0.0460808
		467.66	0.0458357
		467.72	0.0455885
		467.78	0.0453395
		467.84	0.0450886
		467.9	0.0448362
		467.96	0.0445822
		468.02	0.0443268
		468.08	0.04407
		468.14	0.0438121
		468.2	0.043553
		468.26	0.043293
		468.32	0.043032
		468.38	0.0427702
		468.44	0.0425076
		468.5	0.0422444
		468.56	0.0419806
		468.62	0.0417163
		468.68	0.0414516
		468.74	0.0411865
		468.8	0.0409212
		468.86	0.0406555
		468.92	0.0403897
		468.98	0.0401238
		469.04	0.0398578
		469.1	0.0395917
		469.16	0.0393256
		469.22	0.0390596
		469.28	0.0387937
		469.34	0.0385278
		469.4	0.0382621
		469.46	0.0379965
		469.52	0.0377311
		469.58	0.0374658
		469.64	0.0372008
		469.7	0.036936
		469.76	0.0366713
		469.82	0.036407
		469.88	0.0361428
		469.94	0.0358789
		470	0.0356152
		470.06	0.0353517
		470.12	0.0350885
		470.18	0.0348254
		470.24	0.0345626
		470.3	0.0343001
		470.36	0.0340377
		470.42	0.0337755
		470.48	0.0335135
		470.54	0.0332517
		470.6	0.03299
		470.66	0.0327285
		470.72	0.0324672
		470.78	0.032206
		470.84	0.0319449
		470.9	0.0316839
		470.96	0.031423
		471.02	0.0311623
		471.08	0.0309016
		471.14	0.0306411
		471.2	0.0303806
		471.26	0.0301201
		471.32	0.0298598
		471.38	0.0295995
		471.44	0.0293393
		471.5	0.0290792
		471.56	0.0288191
		471.62	0.0285591
		471.68	0.0282991
		471.74	0.0280392
		471.8	0.0277794
		471.86	0.0275197
		471.92	0.0272601
		471.98	0.0270006
		472.04	0.0267412
		472.1	0.0264819
		472.16	0.0262227
		472.22	0.0259637
		472.28	0.0257049
		472.34	0.0254462
		472.4	0.0251878
		472.46	0.0249295
		472.52	0.0246715
		472.58	0.0244138
		472.64	0.0241563
		472.7	0.0238992
		472.76	0.0236424
		472.82	0.0233859
		472.88	0.0231299
		472.94	0.0228742
		473	0.022619
		473.06	0.0223642
		473.12	0.02211
		473.18	0.0218563
		473.24	0.0216031
		473.3	0.0213506
		473.36	0.0210986
		473.42	0.0208474
		473.48	0.0205968
		473.54	0.0203469
		473.6	0.0200979
		473.66	0.0198496
		473.72	0.0196021
		473.78	0.0193555
		473.84	0.0191098
		473.9	0.0188651
		473.96	0.0186213
		474.02	0.0183786
		474.08	0.0181369
		474.14	0.0178962
		474.2	0.0176567
		474.26	0.0174184
		474.32	0.0171813
		474.38	0.0169453
		474.44	0.0167107
		474.5	0.0164774
		474.56	0.0162454
		474.62	0.0160148
		474.68	0.0157855
		474.74	0.0155578
		474.8	0.0153315
		474.86	0.0151068
		474.92	0.0148836
		474.98	0.014662
		475.04	0.014442
		475.1	0.0142237
		475.16	0.0140071
		475.22	0.0137922
		475.28	0.0135791
		475.34	0.0133678
		475.4	0.0131583
		475.46	0.0129507
		475.52	0.0127449
		475.58	0.0125411
		475.64	0.0123392
		475.7	0.0121394
		475.76	0.0119415
		475.82	0.0117456
		475.88	0.0115519
		475.94	0.0113602
		476	0.0111707
		476.06	0.0109833
		476.12	0.0107981
		476.18	0.010615
		476.24	0.0104342
		476.3	0.0102556
		476.36	0.0100793
		476.42	0.0099053
		476.48	0.00973356
		476.54	0.00956414
		476.6	0.00939706
		476.66	0.00923233
		476.72	0.00906996
		476.78	0.00890996
		476.84	0.00875235
		476.9	0.00859715
		476.96	0.00844435
		477.02	0.00829395
		477.08	0.00814599
		477.14	0.00800045
		477.2	0.00785734
		477.26	0.00771663
		477.32	0.00757839
		477.38	0.00744256
		477.44	0.00730918
		477.5	0.00717821
		477.56	0.00704967
		477.62	0.00692354
		477.68	0.00679982
		477.74	0.00667849
		477.8	0.00655954
		477.86	0.00644297
		477.92	0.00632874
		477.98	0.00621686
		478.04	0.0061073
		478.1	0.00600006
		478.16	0.00589508
		478.22	0.00579239
		478.28	0.00569193
		478.34	0.0055937
		478.4	0.00549765
		478.46	0.00540377
		478.52	0.00531202
		478.58	0.0052224
		478.64	0.00513486
		478.7	0.00504938
		478.76	0.00496591
		478.82	0.00488443
		478.88	0.00480491
		478.94	0.0047273
		479	0.00465158
		479.06	0.0045777
		479.12	0.00450564
		479.18	0.00443537
		479.24	0.00436683
		479.3	0.0043
		479.36	0.00423483
		479.42	0.00417128
		479.48	0.00410933
		479.54	0.00404891
		479.6	0.00399
		479.66	0.00393257
		479.72	0.00387656
		479.78	0.00382194
		479.84	0.00376867
		479.9	0.00371671
		479.96	0.00366602
		480.02	0.00361656
		480.08	0.0035683
		480.14	0.00352119
		480.2	0.0034752
		480.26	0.0034303
		480.32	0.00338642
		480.38	0.00334355
		480.44	0.00330165
		480.5	0.00326069
		480.56	0.00322063
		480.62	0.00318143
		480.68	0.00314305
		480.74	0.00310547
		480.8	0.00306866
		480.86	0.00303257
		480.92	0.00299718
		480.98	0.00296245
		481.04	0.00292837
		481.1	0.0028949
		481.16	0.00286202
		481.22	0.00282969
		481.28	0.00279789
		481.34	0.00276659
		481.4	0.00273577
		481.46	0.0027054
		481.52	0.00267546
		481.58	0.00264593
		481.64	0.00261679
		481.7	0.00258802
		481.76	0.00255959
		481.82	0.00253149
		481.88	0.00250371
		481.94	0.0024762
		482	0.00244898
		482.06	0.00242201
		482.12	0.0023953
		482.18	0.00236882
		482.24	0.00234255
		482.3	0.00231649
		482.36	0.00229062
		482.42	0.00226493
		482.48	0.00223941
		482.54	0.00221406
		482.6	0.00218886
		482.66	0.0021638
		482.72	0.00213888
		482.78	0.00211408
		482.84	0.00208941
		482.9	0.00206485
		482.96	0.0020404
		483.02	0.00201605
		483.08	0.0019918
		483.14	0.00196765
		483.2	0.00194359
		483.26	0.00191961
		483.32	0.00189572
		483.38	0.00187192
		483.44	0.00184819
		483.5	0.00182453
		483.56	0.00180097
		483.62	0.00177748
		483.68	0.00175407
		483.74	0.00173074
		483.8	0.00170748
		483.86	0.0016843
		483.92	0.00166119
		483.98	0.00163817
		484.04	0.00161523
		484.1	0.00159236
		484.16	0.00156957
		484.22	0.00154688
		484.28	0.00152427
		484.34	0.00150176
		484.4	0.00147933
		484.46	0.00145701
		484.52	0.00143478
		484.58	0.00141265
		484.64	0.00139063
		484.7	0.00136871
		484.76	0.00134689
		484.82	0.00132518
		484.88	0.00130359
		484.94	0.00128213
		485	0.00126079
		485.06	0.00123957
		485.12	0.00121847
		485.18	0.0011975
		485.24	0.00117668
		485.3	0.00115601
		485.36	0.00113547
		485.42	0.00111507
		485.48	0.00109481
		485.54	0.00107473
		485.6	0.0010548
		485.66	0.00103502
		485.72	0.00101541
		485.78	0.00099597
		485.84	0.000976699
		485.9	0.0009576
		485.96	0.000938677
		486.02	0.000919934
		486.08	0.000901371
		486.14	0.000882994
		486.2	0.000864804
		486.26	0.000846805
		486.32	0.000828989
		486.38	0.000811379
		486.44	0.000793967
		486.5	0.000776755
		486.56	0.000759745
		486.62	0.000742931
		486.68	0.000726334
		486.74	0.000709946
		486.8	0.000693767
		486.86	0.000677802
		486.92	0.00066205
		486.98	0.000646513
		487.04	0.000631193
		487.1	0.000616081
		487.16	0.000601199
		487.22	0.000586528
		487.28	0.000572087
		487.34	0.000557868
		487.4	0.000543871
		487.46	0.000530097
		487.52	0.000516546
		487.58	0.000503218
		487.64	0.000490114
		487.7	0.000477233
		487.76	0.000464576
		487.82	0.000452141
		487.88	0.00043993
		487.94	0.000427942
		488	0.000416175
		488.06	0.00040463
		488.12	0.000393306
		488.18	0.000382201
		488.24	0.000371315
		488.3	0.000360647
		488.36	0.000350195
		488.42	0.000339959
		488.48	0.000329936
		488.54	0.000320126
		488.6	0.000310526
		488.66	0.000301136
		488.72	0.000291953
		488.78	0.000282976
		488.84	0.000274203
		488.9	0.000265632
		488.96	0.00025726
		489.02	0.000249076
		489.08	0.000241098
		489.14	0.000233314
		489.2	0.00022572
		489.26	0.000218314
		489.32	0.000211095
		489.38	0.000204059
		489.44	0.000197205
		489.5	0.000190528
		489.56	0.000184028
		489.62	0.000177701
		489.68	0.000171545
		489.74	0.000165557
		489.8	0.000159725
		489.86	0.000154065
		489.92	0.000148564
		489.98	0.00014322
		490.04	0.000138031
		490.1	0.000132992
		490.16	0.000128102
		490.22	0.000123357
		490.28	0.000118755
		490.34	0.000114293
		490.4	0.000109967
		490.46	0.000105776
		490.52	0.000101715
		490.58	9.77833e-05
		490.64	9.39673e-05
		490.7	9.02843e-05
		490.76	8.6721e-05
		490.82	8.32748e-05
		490.88	7.99429e-05
		490.94	7.67224e-05
		491	7.36107e-05
		491.06	7.06051e-05
		491.12	6.7703e-05
		491.18	6.49015e-05
		491.24	6.21982e-05
		491.3	5.95904e-05
		491.36	5.70755e-05
		491.42	5.46511e-05
		491.48	5.23146e-05
		491.54	5.00636e-05
		491.6	4.78957e-05
		491.66	4.58084e-05
		491.72	4.37994e-05
		491.78	4.18664e-05
		491.84	4.00072e-05
		491.9	3.82194e-05
		491.96	3.65009e-05
		492.02	3.48496e-05
		492.08	3.32633e-05
		492.14	3.174e-05
		492.2	3.02776e-05
		492.26	2.88742e-05
		492.32	2.75278e-05
		492.38	2.62366e-05
		492.44	2.49986e-05
		492.5	2.3812e-05
		492.56	2.26751e-05
		492.62	2.15862e-05
		492.68	2.05436e-05
		492.74	1.95456e-05
		492.8	1.85906e-05
		492.86	1.7677e-05
		492.92	1.68035e-05
		492.98	1.59683e-05
		493.04	1.51703e-05
		493.1	1.44079e-05
		493.16	1.36797e-05
		493.22	1.29845e-05
		493.28	1.23211e-05
		493.34	1.1688e-05
		493.4	1.10842e-05
		493.46	1.05085e-05
		493.52	9.95979e-06
		493.58	9.43691e-06
		493.64	8.93883e-06
		493.7	8.46453e-06
		493.76	8.01302e-06
		493.82	7.58335e-06
		493.88	7.17458e-06
		493.94	6.78584e-06
		494	6.41625e-06
		494.06	6.06499e-06
		494.12	5.73126e-06
		494.18	5.41428e-06
		494.24	5.11331e-06
		494.3	4.82764e-06
		494.36	4.55656e-06
		494.42	4.29943e-06
		494.48	4.0556e-06
		494.54	3.82446e-06
		494.6	3.60541e-06
		494.66	3.38843e-06
		494.72	3.18321e-06
		494.78	2.99831e-06
		494.84	2.81415e-06
		494.9	2.64937e-06
		494.96	2.49348e-06
		495.02	2.34605e-06
		495.08	2.20667e-06
		495.14	2.07495e-06
		495.2	1.95049e-06
		495.26	1.83295e-06
		495.32	1.72197e-06
		495.38	1.61722e-06
		495.44	1.51839e-06
		495.5	1.42516e-06
		495.56	1.33725e-06
		495.62	1.25439e-06
		495.68	1.1763e-06
		495.74	1.10274e-06
		495.8	1.03347e-06
		495.86	9.68257e-07
		495.92	9.06885e-07
		495.98	8.49146e-07
		496.04	7.94843e-07
		496.1	7.43787e-07
		496.16	6.958e-07
		496.22	6.50713e-07
		496.28	6.08363e-07
		496.34	5.68597e-07
		496.4	5.3127e-07
		496.46	4.96243e-07
		496.52	4.63386e-07
		496.58	4.32573e-07
		496.64	4.03687e-07
		496.7	3.76616e-07
		496.76	3.51254e-07
		496.82	3.27501e-07
		496.88	3.05261e-07
		496.94	2.84446e-07
		497	2.64971e-07
		497.06	2.46753e-07
		497.12	2.29719e-07
		497.18	2.13797e-07
		497.24	1.98917e-07
		497.3	1.85017e-07
		497.36	1.72037e-07
		497.42	1.59919e-07
		497.48	1.48609e-07
		497.54	1.38058e-07
		497.6	1.28217e-07
		497.66	1.19041e-07
		497.72	1.10489e-07
		497.78	1.0252e-07
		497.84	9.50965e-08
		497.9	8.81843e-08
		497.96	8.17498e-08
		498.02	7.57619e-08
		498.08	7.01914e-08
		498.14	6.50107e-08
		498.2	6.01943e-08
		498.26	5.57178e-08
		498.32	5.15586e-08
		498.38	4.76954e-08
		498.44	4.41084e-08
		498.5	4.07788e-08
		498.56	3.76892e-08
		498.62	3.48231e-08
		498.68	3.21652e-08
		498.74	2.97012e-08
		498.8	2.74177e-08
		498.86	2.5302e-08
		498.92	2.33426e-08
		498.98	2.15284e-08
		499.04	1.98492e-08
		499.1	1.82954e-08
		499.16	1.68582e-08
		499.22	1.55291e-08
		499.28	1.43006e-08
		499.34	1.31652e-08
		499.4	1.21163e-08
		499.46	1.11476e-08
		499.52	1.02533e-08
		499.58	0
		499.64	0
		499.7	0
		499.76	0
		499.82	0
		499.88	0
		499.94	0
[truncated: 1 more rows]

## Sheet: PlotDat4
Source sheet	data	0.2	462.12	1	402	10	0.85	392
Plot name	Average2	103.8	462.12	2	423.9	8.5	1.15	392
Plot Type	15			3	425	10	1.15	412
1st free col	8			4	439	6.2	0.85	412
Sigma Level	2			5	446	3.9	0.85	392
Absolute Errs	TRUE			6	446.4	7.1	ErrBox	ErrBox
Symbol Type	1			7	448.1	6	1.85	415.4
Inverse Plot	FALSE			8	448.9	5.3	2.15	415.4
Color Plot	TRUE			9	450.9	9.8	2.15	432.4
3D plot	FALSE			10	451.6	5.7	1.85	432.4
Linear	FALSE			11	452	4.5	1.85	415.4
Data Range	W3:X105			12	454.4	6	ErrBox	ErrBox
Filled Symbols	TRUE			13	454.5	5.9	2.85	415
ConcAge	FALSE			14	454.6	5.6	3.15	415
ConcSwap	FALSE			15	454.7	6	3.15	435
1st Symbol-row	1			16	454.9	3.9	2.85	435
				17	455.2	5.7	2.85	415
				18	455.7	5.9	ErrBox	ErrBox
				19	456.3	5.1	3.85	432.8
				20	456.5	5.9	4.15	432.8
				21	457.2	5.1	4.15	445.2
				22	457.4	5.8	3.85	445.2
				23	457.6	5.7	3.85	432.8
				24	457.7	5.1	ErrBox	ErrBox
				25	457.9	5.6	4.85	442.1
				26	458.3	4.8	5.15	442.1
				27	458.3	5	5.15	449.9
				28	458.9	6.5	4.85	449.9
				29	459	8.7	4.85	442.1
				30	459.2	4.8	ErrBox	ErrBox
				31	459.4	4.8	5.85	439.3
				32	459.6	5.8	6.15	439.3
				33	459.7	5.3	6.15	453.5
				34	460	6.1	5.85	453.5
				35	460	6.2	5.85	439.3
				36	460.2	5.6	ErrBox	ErrBox
				37	460.5	4.6	6.85	442.1
				38	460.5	5.1	7.15	442.1
				39	460.6	4.9	7.15	454.1
				40	460.6	5.9	6.85	454.1
				41	460.7	5	6.85	442.1
				42	461.4	7.3	ErrBox	ErrBox
				43	461.7	5.2	7.85	443.6
				44	462.4	4.4	8.15	443.6
				45	462.4	6.4	8.15	454.2
				46	462.4	5.8	7.85	454.2
				47	462.7	4.6	7.85	443.6
				48	462.9	5.2	ErrBox	ErrBox
				49	463.6	5.4	8.85	441.1
				50	463.7	4.9	9.15	441.1
				51	463.7	5.6	9.15	460.7
				52	463.8	5.6	8.85	460.7
				53	463.8	5.5	8.85	441.1
				54	464.1	5.9	ErrBox	ErrBox
				55	464.2	6.1	9.85	445.9
				56	464.3	6.3	10.15	445.9
				57	464.4	6.4	10.15	457.3
				58	464.5	5.2	9.85	457.3
				59	464.5	6	9.85	445.9
				60	464.9	4.7	ErrBox	ErrBox
				61	465	6.3	10.85	447.5
				62	465.2	7.6	11.15	447.5
				63	465.7	4.6	11.15	456.5
				64	465.7	4.7	10.85	456.5
				65	465.7	8.1	10.85	447.5
				66	465.8	5.2	ErrBox	ErrBox
				67	465.9	5	11.85	448.4
				68	466	5.9	12.15	448.4
				69	466.2	6.5	12.15	460.4
				70	466.8	6.4	11.85	460.4
				71	466.9	6	11.85	448.4
				72	466.9	7.8	ErrBox	ErrBox
				73	466.9	7.7	12.85	448.6
				74	466.9	5.4	13.15	448.6
				75	467	7	13.15	460.4
				76	467.1	5.7	12.85	460.4
				77	467.4	7.2	12.85	448.6
				78	467.8	5.4	ErrBox	ErrBox
				79	468	7.6	13.85	449
				80	468.3	7.6	14.15	449
				81	468.4	6.8	14.15	460.2
				82	468.6	6.4	13.85	460.2
				83	468.6	5.5	13.85	449
				84	469.3	6.1	ErrBox	ErrBox
				85	469.3	6.4	14.85	448.7
				86	469.7	6.5	15.15	448.7
				87	469.7	6	15.15	460.7
				88	469.7	5.9	14.85	460.7
				89	470	5.9	14.85	448.7
				90	470.1	6.2	ErrBox	ErrBox
				91	470.2	5	15.85	451
				92	471.7	7.5	16.15	451
				93	471.7	4.8	16.15	458.8
				94	472.3	5.4	15.85	458.8
				95	472.7	9.2	15.85	451
				96	473.1	4.9	ErrBox	ErrBox
				97	473.5	7.1	16.85	449.5
				98	473.9	5.4	17.15	449.5
				99	474.2	6.1	17.15	460.9
				100	474.8	8.3	16.85	460.9
				101	475.4	4.8	16.85	449.5
				102	479.3	6.4	ErrBox	ErrBox
				103	482.9	6.9	17.85	449.8
				IsoLine	IsoLine	IsoLine	18.15	449.8
							18.15	461.6
							17.85	461.6
							17.85	449.8
							ErrBox	ErrBox
							18.85	451.2
							19.15	451.2
							19.15	461.4
							18.85	461.4
							18.85	451.2
							ErrBox	ErrBox
							19.85	450.6
							20.15	450.6
							20.15	462.4
							19.85	462.4
							19.85	450.6
							ErrBox	ErrBox
							20.85	452.1
							21.15	452.1
							21.15	462.3
							20.85	462.3
							20.85	452.1
							ErrBox	ErrBox
							21.85	451.6
							22.15	451.6
							22.15	463.2
							21.85	463.2
							21.85	451.6
							ErrBox	ErrBox
							22.85	451.9
							23.15	451.9
							23.15	463.3
							22.85	463.3
							22.85	451.9
							ErrBox	ErrBox
							23.85	452.6
							24.15	452.6
							24.15	462.8
							23.85	462.8
							23.85	452.6
							ErrBox	ErrBox
							24.85	452.3
							25.15	452.3
							25.15	463.5
							24.85	463.5
							24.85	452.3
							ErrBox	ErrBox
							25.85	453.5
							26.15	453.5
							26.15	463.1
							25.85	463.1
							25.85	453.5
							ErrBox	ErrBox
							26.85	453.3
							27.15	453.3
							27.15	463.3
							26.85	463.3
							26.85	453.3
							ErrBox	ErrBox
							27.85	452.4
							28.15	452.4
							28.15	465.4
							27.85	465.4
							27.85	452.4
							ErrBox	ErrBox
							28.85	450.3
							29.15	450.3
							29.15	467.7
							28.85	467.7
							28.85	450.3
							ErrBox	ErrBox
							29.85	454.4
							30.15	454.4
							30.15	464
							29.85	464
							29.85	454.4
							ErrBox	ErrBox
							30.85	454.6
							31.15	454.6
							31.15	464.2
							30.85	464.2
							30.85	454.6
							ErrBox	ErrBox
							31.85	453.8
							32.15	453.8
							32.15	465.4
							31.85	465.4
							31.85	453.8
							ErrBox	ErrBox
							32.85	454.4
							33.15	454.4
							33.15	465
							32.85	465
							32.85	454.4
							ErrBox	ErrBox
							33.85	453.9
							34.15	453.9
							34.15	466.1
							33.85	466.1
							33.85	453.9
							ErrBox	ErrBox
							34.85	453.8
							35.15	453.8
							35.15	466.2
							34.85	466.2
							34.85	453.8
							ErrBox	ErrBox
							35.85	454.6
							36.15	454.6
							36.15	465.8
							35.85	465.8
							35.85	454.6
							ErrBox	ErrBox
							36.85	455.9
							37.15	455.9
							37.15	465.1
							36.85	465.1
							36.85	455.9
							ErrBox	ErrBox
							37.85	455.4
							38.15	455.4
							38.15	465.6
							37.85	465.6
							37.85	455.4
							ErrBox	ErrBox
							38.85	455.7
							39.15	455.7
							39.15	465.5
							38.85	465.5
							38.85	455.7
							ErrBox	ErrBox
							39.85	454.7
							40.15	454.7
							40.15	466.5
							39.85	466.5
							39.85	454.7
							ErrBox	ErrBox
							40.85	455.7
							41.15	455.7
							41.15	465.7
							40.85	465.7
							40.85	455.7
							ErrBox	ErrBox
							41.85	454.1
							42.15	454.1
							42.15	468.7
							41.85	468.7
							41.85	454.1
							ErrBox	ErrBox
							42.85	456.5
							43.15	456.5
							43.15	466.9
							42.85	466.9
							42.85	456.5
							ErrBox	ErrBox
							43.85	458
							44.15	458
							44.15	466.8
							43.85	466.8
							43.85	458
							ErrBox	ErrBox
							44.85	456
							45.15	456
							45.15	468.8
							44.85	468.8
							44.85	456
							ErrBox	ErrBox
							45.85	456.6
							46.15	456.6
							46.15	468.2
							45.85	468.2
							45.85	456.6
							ErrBox	ErrBox
							46.85	458.1
							47.15	458.1
							47.15	467.3
							46.85	467.3
							46.85	458.1
							ErrBox	ErrBox
							47.85	457.7
							48.15	457.7
							48.15	468.1
							47.85	468.1
							47.85	457.7
							ErrBox	ErrBox
							48.85	458.2
							49.15	458.2
							49.15	469
							48.85	469
							48.85	458.2
							ErrBox	ErrBox
							49.85	458.8
							50.15	458.8
							50.15	468.6
							49.85	468.6
							49.85	458.8
							ErrBox	ErrBox
							50.85	458.1
							51.15	458.1
							51.15	469.3
							50.85	469.3
							50.85	458.1
							ErrBox	ErrBox
							51.85	458.2
							52.15	458.2
							52.15	469.4
							51.85	469.4
							51.85	458.2
							ErrBox	ErrBox
							52.85	458.3
							53.15	458.3
							53.15	469.3
							52.85	469.3
							52.85	458.3
							ErrBox	ErrBox
							53.85	458.2
							54.15	458.2
							54.15	470
							53.85	470
							53.85	458.2
							ErrBox	ErrBox
							54.85	458.1
							55.15	458.1
							55.15	470.3
							54.85	470.3
							54.85	458.1
							ErrBox	ErrBox
							55.85	458
							56.15	458
							56.15	470.6
							55.85	470.6
							55.85	458
							ErrBox	ErrBox
							56.85	458
							57.15	458
							57.15	470.8
							56.85	470.8
							56.85	458
							ErrBox	ErrBox
							57.85	459.3
							58.15	459.3
							58.15	469.7
							57.85	469.7
							57.85	459.3
							ErrBox	ErrBox
							58.85	458.5
							59.15	458.5
							59.15	470.5
							58.85	470.5
							58.85	458.5
							ErrBox	ErrBox
							59.85	460.2
							60.15	460.2
							60.15	469.6
							59.85	469.6
							59.85	460.2
							ErrBox	ErrBox
							60.85	458.7
							61.15	458.7
							61.15	471.3
							60.85	471.3
							60.85	458.7
							ErrBox	ErrBox
							61.85	457.6
							62.15	457.6
							62.15	472.8
							61.85	472.8
							61.85	457.6
							ErrBox	ErrBox
							62.85	461.1
							63.15	461.1
							63.15	470.3
							62.85	470.3
							62.85	461.1
							ErrBox	ErrBox
							63.85	461
							64.15	461
							64.15	470.4
							63.85	470.4
							63.85	461
							ErrBox	ErrBox
							64.85	457.6
							65.15	457.6
							65.15	473.8
							64.85	473.8
							64.85	457.6
							ErrBox	ErrBox
							65.85	460.6
							66.15	460.6
							66.15	471
							65.85	471
							65.85	460.6
							ErrBox	ErrBox
							66.85	460.9
							67.15	460.9
							67.15	470.9
							66.85	470.9
							66.85	460.9
							ErrBox	ErrBox
							67.85	460.1
							68.15	460.1
							68.15	471.9
							67.85	471.9
							67.85	460.1
							ErrBox	ErrBox
							68.85	459.7
							69.15	459.7
							69.15	472.7
							68.85	472.7
							68.85	459.7
							ErrBox	ErrBox
							69.85	460.4
							70.15	460.4
							70.15	473.2
							69.85	473.2
							69.85	460.4
							ErrBox	ErrBox
							70.85	460.9
							71.15	460.9
							71.15	472.9
							70.85	472.9
							70.85	460.9
							ErrBox	ErrBox
							71.85	459.1
							72.15	459.1
							72.15	474.7
							71.85	474.7
							71.85	459.1
							ErrBox	ErrBox
							72.85	459.2
							73.15	459.2
							73.15	474.6
							72.85	474.6
							72.85	459.2
							ErrBox	ErrBox
							73.85	461.5
							74.15	461.5
							74.15	472.3
							73.85	472.3
							73.85	461.5
							ErrBox	ErrBox
							74.85	460
							75.15	460
							75.15	474
							74.85	474
							74.85	460
							ErrBox	ErrBox
							75.85	461.4
							76.15	461.4
							76.15	472.8
							75.85	472.8
							75.85	461.4
							ErrBox	ErrBox
							76.85	460.2
							77.15	460.2
							77.15	474.6
							76.85	474.6
							76.85	460.2
							ErrBox	ErrBox
							77.85	462.4
							78.15	462.4
							78.15	473.2
							77.85	473.2
							77.85	462.4
							ErrBox	ErrBox
							78.85	460.4
							79.15	460.4
							79.15	475.6
							78.85	475.6
							78.85	460.4
							ErrBox	ErrBox
							79.85	460.7
							80.15	460.7
							80.15	475.9
							79.85	475.9
							79.85	460.7
							ErrBox	ErrBox
							80.85	461.6
							81.15	461.6
							81.15	475.2
							80.85	475.2
							80.85	461.6
							ErrBox	ErrBox
							81.85	462.2
							82.15	462.2
							82.15	475
							81.85	475
							81.85	462.2
							ErrBox	ErrBox
							82.85	463.1
							83.15	463.1
							83.15	474.1
							82.85	474.1
							82.85	463.1
							ErrBox	ErrBox
							83.85	463.2
							84.15	463.2
							84.15	475.4
							83.85	475.4
							83.85	463.2
							ErrBox	ErrBox
							84.85	462.9
							85.15	462.9
							85.15	475.7
							84.85	475.7
							84.85	462.9
							ErrBox	ErrBox
							85.85	463.2
							86.15	463.2
							86.15	476.2
							85.85	476.2
							85.85	463.2
							ErrBox	ErrBox
							86.85	463.7
							87.15	463.7
							87.15	475.7
							86.85	475.7
							86.85	463.7
							ErrBox	ErrBox
							87.85	463.8
							88.15	463.8
							88.15	475.6
							87.85	475.6
							87.85	463.8
							ErrBox	ErrBox
							88.85	464.1
							89.15	464.1
							89.15	475.9
							88.85	475.9
							88.85	464.1
							ErrBox	ErrBox
							89.85	463.9
							90.15	463.9
							90.15	476.3
							89.85	476.3
							89.85	463.9
							ErrBox	ErrBox
							90.85	465.2
							91.15	465.2
							91.15	475.2
							90.85	475.2
							90.85	465.2
							ErrBox	ErrBox
							91.85	464.2
							92.15	464.2
							92.15	479.2
							91.85	479.2
							91.85	464.2
							ErrBox	ErrBox
							92.85	466.9
							93.15	466.9
							93.15	476.5
							92.85	476.5
							92.85	466.9
							ErrBox	ErrBox
							93.85	466.9
							94.15	466.9
							94.15	477.7
							93.85	477.7
							93.85	466.9
							ErrBox	ErrBox
							94.85	463.5
							95.15	463.5
							95.15	481.9
							94.85	481.9
							94.85	463.5
							ErrBox	ErrBox
							95.85	468.2
							96.15	468.2
							96.15	478
							95.85	478
							95.85	468.2
							ErrBox	ErrBox
							96.85	466.4
							97.15	466.4
							97.15	480.6
							96.85	480.6
							96.85	466.4
							ErrBox	ErrBox
							97.85	468.5
							98.15	468.5
							98.15	479.3
							97.85	479.3
							97.85	468.5
							ErrBox	ErrBox
							98.85	468.1
							99.15	468.1
							99.15	480.3
							98.85	480.3
							98.85	468.1
							ErrBox	ErrBox
							99.85	466.5
							100.15	466.5
							100.15	483.1
							99.85	483.1
							99.85	466.5
							ErrBox	ErrBox
							100.85	470.6
							101.15	470.6
							101.15	480.2
							100.85	480.2
							100.85	470.6
							ErrBox	ErrBox
							101.85	472.9
							102.15	472.9
							102.15	485.7
							101.85	485.7
							101.85	472.9
							ErrBox	ErrBox
							102.85	476
							103.15	476
							103.15	489.8
							102.85	489.8
							102.85	476
							ErrBox	ErrBox

## Sheet: PlotDat1
Source sheet	data	0.2	462.802	1	446	3.9	0.85	442.1
Plot name	Average1	99.8	462.802	2	446.4	7.1	1.15	442.1
Plot Type	15			3	448.1	6	1.15	449.9
1st free col	8			4	448.9	5.3	0.85	449.9
Sigma Level	2			5	450.9	9.8	0.85	442.1
Absolute Errs	TRUE			6	451.6	5.7	ErrBox	ErrBox
Symbol Type	1			7	452	4.5	1.85	439.3
Inverse Plot	FALSE			8	454.4	6	2.15	439.3
Color Plot	TRUE			9	454.5	5.9	2.15	453.5
3D plot	FALSE			10	454.6	5.6	1.85	453.5
Linear	FALSE			11	454.7	6	1.85	439.3
Data Range	AB6:AC104			12	454.9	3.9	ErrBox	ErrBox
Filled Symbols	TRUE			13	455.2	5.7	2.85	442.1
ConcAge	FALSE			14	455.7	5.9	3.15	442.1
ConcSwap	FALSE			15	456.3	5.1	3.15	454.1
1st Symbol-row	1			16	456.5	5.9	2.85	454.1
				17	457.2	5.1	2.85	442.1
				18	457.4	5.8	ErrBox	ErrBox
				19	457.6	5.7	3.85	443.6
				20	457.7	5.1	4.15	443.6
				21	457.9	5.6	4.15	454.2
				22	458.3	4.8	3.85	454.2
				23	458.3	5	3.85	443.6
				24	458.9	6.5	ErrBox	ErrBox
				25	459	8.7	4.85	441.1
				26	459.2	4.8	5.15	441.1
				27	459.4	4.8	5.15	460.7
				28	459.6	5.8	4.85	460.7
				29	459.7	5.3	4.85	441.1
				30	460	6.1	ErrBox	ErrBox
				31	460	6.2	5.85	445.9
				32	460.2	5.6	6.15	445.9
				33	460.5	4.6	6.15	457.3
				34	460.5	5.1	5.85	457.3
				35	460.6	4.9	5.85	445.9
				36	460.6	5.9	ErrBox	ErrBox
				37	460.7	5	6.85	447.5
				38	461.4	7.3	7.15	447.5
				39	461.7	5.2	7.15	456.5
				40	462.4	4.4	6.85	456.5
				41	462.4	6.4	6.85	447.5
				42	462.4	5.8	ErrBox	ErrBox
				43	462.7	4.6	7.85	448.4
				44	462.9	5.2	8.15	448.4
				45	463.6	5.4	8.15	460.4
				46	463.7	4.9	7.85	460.4
				47	463.7	5.6	7.85	448.4
				48	463.8	5.6	ErrBox	ErrBox
				49	463.8	5.5	8.85	448.6
				50	464.1	5.9	9.15	448.6
				51	464.2	6.1	9.15	460.4
				52	464.3	6.3	8.85	460.4
				53	464.4	6.4	8.85	448.6
				54	464.5	5.2	ErrBox	ErrBox
				55	464.5	6	9.85	449
				56	464.9	4.7	10.15	449
				57	465	6.3	10.15	460.2
				58	465.2	7.6	9.85	460.2
				59	465.7	4.6	9.85	449
				60	465.7	4.7	ErrBox	ErrBox
				61	465.7	8.1	10.85	448.7
				62	465.8	5.2	11.15	448.7
				63	465.9	5	11.15	460.7
				64	466	5.9	10.85	460.7
				65	466.2	6.5	10.85	448.7
				66	466.8	6.4	ErrBox	ErrBox
				67	466.9	6	11.85	451
				68	466.9	7.8	12.15	451
				69	466.9	7.7	12.15	458.8
				70	466.9	5.4	11.85	458.8
				71	467	7	11.85	451
				72	467.1	5.7	ErrBox	ErrBox
				73	467.4	7.2	12.85	449.5
				74	467.8	5.4	13.15	449.5
				75	468	7.6	13.15	460.9
				76	468.3	7.6	12.85	460.9
				77	468.4	6.8	12.85	449.5
				78	468.6	6.4	ErrBox	ErrBox
				79	468.6	5.5	13.85	449.8
				80	469.3	6.1	14.15	449.8
				81	469.3	6.4	14.15	461.6
				82	469.7	6.5	13.85	461.6
				83	469.7	6	13.85	449.8
				84	469.7	5.9	ErrBox	ErrBox
				85	470	5.9	14.85	451.2
				86	470.1	6.2	15.15	451.2
				87	470.2	5	15.15	461.4
				88	471.7	7.5	14.85	461.4
				89	471.7	4.8	14.85	451.2
				90	472.3	5.4	ErrBox	ErrBox
				91	472.7	9.2	15.85	450.6
				92	473.1	4.9	16.15	450.6
				93	473.5	7.1	16.15	462.4
				94	473.9	5.4	15.85	462.4
				95	474.2	6.1	15.85	450.6
				96	474.8	8.3	ErrBox	ErrBox
				97	475.4	4.8	16.85	452.1
				98	479.3	6.4	17.15	452.1
				99	482.9	6.9	17.15	462.3
				IsoLine	IsoLine	IsoLine	16.85	462.3
							16.85	452.1
							ErrBox	ErrBox
							17.85	451.6
							18.15	451.6
							18.15	463.2
							17.85	463.2
							17.85	451.6
							ErrBox	ErrBox
							18.85	451.9
							19.15	451.9
							19.15	463.3
							18.85	463.3
							18.85	451.9
							ErrBox	ErrBox
							19.85	452.6
							20.15	452.6
							20.15	462.8
							19.85	462.8
							19.85	452.6
							ErrBox	ErrBox
							20.85	452.3
							21.15	452.3
							21.15	463.5
							20.85	463.5
							20.85	452.3
							ErrBox	ErrBox
							21.85	453.5
							22.15	453.5
							22.15	463.1
							21.85	463.1
							21.85	453.5
							ErrBox	ErrBox
							22.85	453.3
							23.15	453.3
							23.15	463.3
							22.85	463.3
							22.85	453.3
							ErrBox	ErrBox
							23.85	452.4
							24.15	452.4
							24.15	465.4
							23.85	465.4
							23.85	452.4
							ErrBox	ErrBox
							24.85	450.3
							25.15	450.3
							25.15	467.7
							24.85	467.7
							24.85	450.3
							ErrBox	ErrBox
							25.85	454.4
							26.15	454.4
							26.15	464
							25.85	464
							25.85	454.4
							ErrBox	ErrBox
							26.85	454.6
							27.15	454.6
							27.15	464.2
							26.85	464.2
							26.85	454.6
							ErrBox	ErrBox
							27.85	453.8
							28.15	453.8
							28.15	465.4
							27.85	465.4
							27.85	453.8
							ErrBox	ErrBox
							28.85	454.4
							29.15	454.4
							29.15	465
							28.85	465
							28.85	454.4
							ErrBox	ErrBox
							29.85	453.9
							30.15	453.9
							30.15	466.1
							29.85	466.1
							29.85	453.9
							ErrBox	ErrBox
							30.85	453.8
							31.15	453.8
							31.15	466.2
							30.85	466.2
							30.85	453.8
							ErrBox	ErrBox
							31.85	454.6
							32.15	454.6
							32.15	465.8
							31.85	465.8
							31.85	454.6
							ErrBox	ErrBox
							32.85	455.9
							33.15	455.9
							33.15	465.1
							32.85	465.1
							32.85	455.9
							ErrBox	ErrBox
							33.85	455.4
							34.15	455.4
							34.15	465.6
							33.85	465.6
							33.85	455.4
							ErrBox	ErrBox
							34.85	455.7
							35.15	455.7
							35.15	465.5
							34.85	465.5
							34.85	455.7
							ErrBox	ErrBox
							35.85	454.7
							36.15	454.7
							36.15	466.5
							35.85	466.5
							35.85	454.7
							ErrBox	ErrBox
							36.85	455.7
							37.15	455.7
							37.15	465.7
							36.85	465.7
							36.85	455.7
							ErrBox	ErrBox
							37.85	454.1
							38.15	454.1
							38.15	468.7
							37.85	468.7
							37.85	454.1
							ErrBox	ErrBox
							38.85	456.5
							39.15	456.5
							39.15	466.9
							38.85	466.9
							38.85	456.5
							ErrBox	ErrBox
							39.85	458
							40.15	458
							40.15	466.8
							39.85	466.8
							39.85	458
							ErrBox	ErrBox
							40.85	456
							41.15	456
							41.15	468.8
							40.85	468.8
							40.85	456
							ErrBox	ErrBox
							41.85	456.6
							42.15	456.6
							42.15	468.2
							41.85	468.2
							41.85	456.6
							ErrBox	ErrBox
							42.85	458.1
							43.15	458.1
							43.15	467.3
							42.85	467.3
							42.85	458.1
							ErrBox	ErrBox
							43.85	457.7
							44.15	457.7
							44.15	468.1
							43.85	468.1
							43.85	457.7
							ErrBox	ErrBox
							44.85	458.2
							45.15	458.2
							45.15	469
							44.85	469
							44.85	458.2
							ErrBox	ErrBox
							45.85	458.8
							46.15	458.8
							46.15	468.6
							45.85	468.6
							45.85	458.8
							ErrBox	ErrBox
							46.85	458.1
							47.15	458.1
							47.15	469.3
							46.85	469.3
							46.85	458.1
							ErrBox	ErrBox
							47.85	458.2
							48.15	458.2
							48.15	469.4
							47.85	469.4
							47.85	458.2
							ErrBox	ErrBox
							48.85	458.3
							49.15	458.3
							49.15	469.3
							48.85	469.3
							48.85	458.3
							ErrBox	ErrBox
							49.85	458.2
							50.15	458.2
							50.15	470
							49.85	470
							49.85	458.2
							ErrBox	ErrBox
							50.85	458.1
							51.15	458.1
							51.15	470.3
							50.85	470.3
							50.85	458.1
							ErrBox	ErrBox
							51.85	458
							52.15	458
							52.15	470.6
							51.85	470.6
							51.85	458
							ErrBox	ErrBox
							52.85	458
							53.15	458
							53.15	470.8
							52.85	470.8
							52.85	458
							ErrBox	ErrBox
							53.85	459.3
							54.15	459.3
							54.15	469.7
							53.85	469.7
							53.85	459.3
							ErrBox	ErrBox
							54.85	458.5
							55.15	458.5
							55.15	470.5
							54.85	470.5
							54.85	458.5
							ErrBox	ErrBox
							55.85	460.2
							56.15	460.2
							56.15	469.6
							55.85	469.6
							55.85	460.2
							ErrBox	ErrBox
							56.85	458.7
							57.15	458.7
							57.15	471.3
							56.85	471.3
							56.85	458.7
							ErrBox	ErrBox
							57.85	457.6
							58.15	457.6
							58.15	472.8
							57.85	472.8
							57.85	457.6
							ErrBox	ErrBox
							58.85	461.1
							59.15	461.1
							59.15	470.3
							58.85	470.3
							58.85	461.1
							ErrBox	ErrBox
							59.85	461
							60.15	461
							60.15	470.4
							59.85	470.4
							59.85	461
							ErrBox	ErrBox
							60.85	457.6
							61.15	457.6
							61.15	473.8
							60.85	473.8
							60.85	457.6
							ErrBox	ErrBox
							61.85	460.6
							62.15	460.6
							62.15	471
							61.85	471
							61.85	460.6
							ErrBox	ErrBox
							62.85	460.9
							63.15	460.9
							63.15	470.9
							62.85	470.9
							62.85	460.9
							ErrBox	ErrBox
							63.85	460.1
							64.15	460.1
							64.15	471.9
							63.85	471.9
							63.85	460.1
							ErrBox	ErrBox
							64.85	459.7
							65.15	459.7
							65.15	472.7
							64.85	472.7
							64.85	459.7
							ErrBox	ErrBox
							65.85	460.4
							66.15	460.4
							66.15	473.2
							65.85	473.2
							65.85	460.4
							ErrBox	ErrBox
							66.85	460.9
							67.15	460.9
							67.15	472.9
							66.85	472.9
							66.85	460.9
							ErrBox	ErrBox
							67.85	459.1
							68.15	459.1
							68.15	474.7
							67.85	474.7
							67.85	459.1
							ErrBox	ErrBox
							68.85	459.2
							69.15	459.2
							69.15	474.6
							68.85	474.6
							68.85	459.2
							ErrBox	ErrBox
							69.85	461.5
							70.15	461.5
							70.15	472.3
							69.85	472.3
							69.85	461.5
							ErrBox	ErrBox
							70.85	460
							71.15	460
							71.15	474
							70.85	474
							70.85	460
							ErrBox	ErrBox
							71.85	461.4
							72.15	461.4
							72.15	472.8
							71.85	472.8
							71.85	461.4
							ErrBox	ErrBox
							72.85	460.2
							73.15	460.2
							73.15	474.6
							72.85	474.6
							72.85	460.2
							ErrBox	ErrBox
							73.85	462.4
							74.15	462.4
							74.15	473.2
							73.85	473.2
							73.85	462.4
							ErrBox	ErrBox
							74.85	460.4
							75.15	460.4
							75.15	475.6
							74.85	475.6
							74.85	460.4
							ErrBox	ErrBox
							75.85	460.7
							76.15	460.7
							76.15	475.9
							75.85	475.9
							75.85	460.7
							ErrBox	ErrBox
							76.85	461.6
							77.15	461.6
							77.15	475.2
							76.85	475.2
							76.85	461.6
							ErrBox	ErrBox
							77.85	462.2
							78.15	462.2
							78.15	475
							77.85	475
							77.85	462.2
							ErrBox	ErrBox
							78.85	463.1
							79.15	463.1
							79.15	474.1
							78.85	474.1
							78.85	463.1
							ErrBox	ErrBox
							79.85	463.2
							80.15	463.2
							80.15	475.4
							79.85	475.4
							79.85	463.2
							ErrBox	ErrBox
							80.85	462.9
							81.15	462.9
							81.15	475.7
							80.85	475.7
							80.85	462.9
							ErrBox	ErrBox
							81.85	463.2
							82.15	463.2
							82.15	476.2
							81.85	476.2
							81.85	463.2
							ErrBox	ErrBox
							82.85	463.7
							83.15	463.7
							83.15	475.7
							82.85	475.7
							82.85	463.7
							ErrBox	ErrBox
							83.85	463.8
							84.15	463.8
							84.15	475.6
							83.85	475.6
							83.85	463.8
							ErrBox	ErrBox
							84.85	464.1
							85.15	464.1
							85.15	475.9
							84.85	475.9
							84.85	464.1
							ErrBox	ErrBox
							85.85	463.9
							86.15	463.9
							86.15	476.3
							85.85	476.3
							85.85	463.9
							ErrBox	ErrBox
							86.85	465.2
							87.15	465.2
							87.15	475.2
							86.85	475.2
							86.85	465.2
							ErrBox	ErrBox
							87.85	464.2
							88.15	464.2
							88.15	479.2
							87.85	479.2
							87.85	464.2
							ErrBox	ErrBox
							88.85	466.9
							89.15	466.9
							89.15	476.5
							88.85	476.5
							88.85	466.9
							ErrBox	ErrBox
							89.85	466.9
							90.15	466.9
							90.15	477.7
							89.85	477.7
							89.85	466.9
							ErrBox	ErrBox
							90.85	463.5
							91.15	463.5
							91.15	481.9
							90.85	481.9
							90.85	463.5
							ErrBox	ErrBox
							91.85	468.2
							92.15	468.2
							92.15	478
							91.85	478
							91.85	468.2
							ErrBox	ErrBox
							92.85	466.4
							93.15	466.4
							93.15	480.6
							92.85	480.6
							92.85	466.4
							ErrBox	ErrBox
							93.85	468.5
							94.15	468.5
							94.15	479.3
							93.85	479.3
							93.85	468.5
							ErrBox	ErrBox
							94.85	468.1
							95.15	468.1
							95.15	480.3
							94.85	480.3
							94.85	468.1
							ErrBox	ErrBox
							95.85	466.5
							96.15	466.5
							96.15	483.1
							95.85	483.1
							95.85	466.5
							ErrBox	ErrBox
							96.85	470.6
							97.15	470.6
							97.15	480.2
							96.85	480.2
							96.85	470.6
							ErrBox	ErrBox
							97.85	472.9
							98.15	472.9
							98.15	485.7
							97.85	485.7
							97.85	472.9
							ErrBox	ErrBox
							98.85	476
							99.15	476
							99.15	489.8
							98.85	489.8
							98.85	476
							ErrBox	ErrBox

## Sheet: PlotDat5
Source sheet	data	0.2	463.506	1	448.9	5.3	0.85	443.6
Plot name	Average2	95.8	463.506	2	450.9	9.8	1.15	443.6
Plot Type	15			3	451.6	5.7	1.15	454.2
1st free col	8			4	452	4.5	0.85	454.2
Sigma Level	2			5	454.5	5.9	0.85	443.6
Absolute Errs	TRUE			6	454.6	5.6	ErrBox	ErrBox
Symbol Type	1			7	454.7	6	1.85	441.1
Inverse Plot	FALSE			8	454.9	3.9	2.15	441.1
Color Plot	TRUE			9	455.2	5.7	2.15	460.7
3D plot	FALSE			10	455.7	5.9	1.85	460.7
Linear	FALSE			11	456.3	5.1	1.85	441.1
Data Range	AC9:AD104			12	456.5	5.9	ErrBox	ErrBox
Filled Symbols	TRUE			13	457.2	5.1	2.85	445.9
ConcAge	FALSE			14	457.4	5.8	3.15	445.9
ConcSwap	FALSE			15	457.6	5.7	3.15	457.3
1st Symbol-row	1			16	457.7	5.1	2.85	457.3
				17	457.9	5.6	2.85	445.9
				18	458.3	4.8	ErrBox	ErrBox
				19	458.3	5	3.85	447.5
				20	458.9	6.5	4.15	447.5
				21	459	8.7	4.15	456.5
				22	459.2	4.8	3.85	456.5
				23	459.4	4.8	3.85	447.5
				24	459.6	5.8	ErrBox	ErrBox
				25	459.7	5.3	4.85	448.6
				26	460	6.2	5.15	448.6
				27	460	6.1	5.15	460.4
				28	460.2	5.6	4.85	460.4
				29	460.5	5.1	4.85	448.6
				30	460.5	4.6	ErrBox	ErrBox
				31	460.6	5.9	5.85	449
				32	460.6	4.9	6.15	449
				33	460.7	5	6.15	460.2
				34	461.4	7.3	5.85	460.2
				35	461.7	5.2	5.85	449
				36	462.4	4.4	ErrBox	ErrBox
				37	462.4	6.4	6.85	448.7
				38	462.4	5.8	7.15	448.7
				39	462.7	4.6	7.15	460.7
				40	462.9	5.2	6.85	460.7
				41	463.6	5.4	6.85	448.7
				42	463.7	4.9	ErrBox	ErrBox
				43	463.7	5.6	7.85	451
				44	463.8	5.5	8.15	451
				45	463.8	5.6	8.15	458.8
				46	464.1	5.9	7.85	458.8
				47	464.2	6.1	7.85	451
				48	464.3	6.3	ErrBox	ErrBox
				49	464.4	6.4	8.85	449.5
				50	464.5	5.2	9.15	449.5
				51	464.5	6	9.15	460.9
				52	464.9	4.7	8.85	460.9
				53	465	6.3	8.85	449.5
				54	465.2	7.6	ErrBox	ErrBox
				55	465.7	4.6	9.85	449.8
				56	465.7	8.1	10.15	449.8
				57	465.7	4.7	10.15	461.6
				58	465.8	5.2	9.85	461.6
				59	465.9	5	9.85	449.8
				60	466	5.9	ErrBox	ErrBox
				61	466.2	6.5	10.85	451.2
				62	466.8	6.4	11.15	451.2
				63	466.9	5.4	11.15	461.4
				64	466.9	7.7	10.85	461.4
				65	466.9	6	10.85	451.2
				66	466.9	7.8	ErrBox	ErrBox
				67	467	7	11.85	450.6
				68	467.1	5.7	12.15	450.6
				69	467.4	7.2	12.15	462.4
				70	467.8	5.4	11.85	462.4
				71	468	7.6	11.85	450.6
				72	468.3	7.6	ErrBox	ErrBox
				73	468.4	6.8	12.85	452.1
				74	468.6	5.5	13.15	452.1
				75	468.6	6.4	13.15	462.3
				76	469.3	6.4	12.85	462.3
				77	469.3	6.1	12.85	452.1
				78	469.7	6.5	ErrBox	ErrBox
				79	469.7	6	13.85	451.6
				80	469.7	5.9	14.15	451.6
				81	470	5.9	14.15	463.2
				82	470.1	6.2	13.85	463.2
				83	470.2	5	13.85	451.6
				84	471.7	7.5	ErrBox	ErrBox
				85	471.7	4.8	14.85	451.9
				86	472.3	5.4	15.15	451.9
				87	472.7	9.2	15.15	463.3
				88	473.1	4.9	14.85	463.3
				89	473.5	7.1	14.85	451.9
				90	473.9	5.4	ErrBox	ErrBox
				91	474.2	6.1	15.85	452.6
				92	474.8	8.3	16.15	452.6
				93	475.4	4.8	16.15	462.8
				94	479.3	6.4	15.85	462.8
				95	482.9	6.9	15.85	452.6
				IsoLine	IsoLine	IsoLine	ErrBox	ErrBox
							16.85	452.3
							17.15	452.3
							17.15	463.5
							16.85	463.5
							16.85	452.3
							ErrBox	ErrBox
							17.85	453.5
							18.15	453.5
							18.15	463.1
							17.85	463.1
							17.85	453.5
							ErrBox	ErrBox
							18.85	453.3
							19.15	453.3
							19.15	463.3
							18.85	463.3
							18.85	453.3
							ErrBox	ErrBox
							19.85	452.4
							20.15	452.4
							20.15	465.4
							19.85	465.4
							19.85	452.4
							ErrBox	ErrBox
							20.85	450.3
							21.15	450.3
							21.15	467.7
							20.85	467.7
							20.85	450.3
							ErrBox	ErrBox
							21.85	454.4
							22.15	454.4
							22.15	464
							21.85	464
							21.85	454.4
							ErrBox	ErrBox
							22.85	454.6
							23.15	454.6
							23.15	464.2
							22.85	464.2
							22.85	454.6
							ErrBox	ErrBox
							23.85	453.8
							24.15	453.8
							24.15	465.4
							23.85	465.4
							23.85	453.8
							ErrBox	ErrBox
							24.85	454.4
							25.15	454.4
							25.15	465
							24.85	465
							24.85	454.4
							ErrBox	ErrBox
							25.85	453.8
							26.15	453.8
							26.15	466.2
							25.85	466.2
							25.85	453.8
							ErrBox	ErrBox
							26.85	453.9
							27.15	453.9
							27.15	466.1
							26.85	466.1
							26.85	453.9
							ErrBox	ErrBox
							27.85	454.6
							28.15	454.6
							28.15	465.8
							27.85	465.8
							27.85	454.6
							ErrBox	ErrBox
							28.85	455.4
							29.15	455.4
							29.15	465.6
							28.85	465.6
							28.85	455.4
							ErrBox	ErrBox
							29.85	455.9
							30.15	455.9
							30.15	465.1
							29.85	465.1
							29.85	455.9
							ErrBox	ErrBox
							30.85	454.7
							31.15	454.7
							31.15	466.5
							30.85	466.5
							30.85	454.7
							ErrBox	ErrBox
							31.85	455.7
							32.15	455.7
							32.15	465.5
							31.85	465.5
							31.85	455.7
							ErrBox	ErrBox
							32.85	455.7
							33.15	455.7
							33.15	465.7
							32.85	465.7
							32.85	455.7
							ErrBox	ErrBox
							33.85	454.1
							34.15	454.1
							34.15	468.7
							33.85	468.7
							33.85	454.1
							ErrBox	ErrBox
							34.85	456.5
							35.15	456.5
							35.15	466.9
							34.85	466.9
							34.85	456.5
							ErrBox	ErrBox
							35.85	458
							36.15	458
							36.15	466.8
							35.85	466.8
							35.85	458
							ErrBox	ErrBox
							36.85	456
							37.15	456
							37.15	468.8
							36.85	468.8
							36.85	456
							ErrBox	ErrBox
							37.85	456.6
							38.15	456.6
							38.15	468.2
							37.85	468.2
							37.85	456.6
							ErrBox	ErrBox
							38.85	458.1
							39.15	458.1
							39.15	467.3
							38.85	467.3
							38.85	458.1
							ErrBox	ErrBox
							39.85	457.7
							40.15	457.7
							40.15	468.1
							39.85	468.1
							39.85	457.7
							ErrBox	ErrBox
							40.85	458.2
							41.15	458.2
							41.15	469
							40.85	469
							40.85	458.2
							ErrBox	ErrBox
							41.85	458.8
							42.15	458.8
							42.15	468.6
							41.85	468.6
							41.85	458.8
							ErrBox	ErrBox
							42.85	458.1
							43.15	458.1
							43.15	469.3
							42.85	469.3
							42.85	458.1
							ErrBox	ErrBox
							43.85	458.3
							44.15	458.3
							44.15	469.3
							43.85	469.3
							43.85	458.3
							ErrBox	ErrBox
							44.85	458.2
							45.15	458.2
							45.15	469.4
							44.85	469.4
							44.85	458.2
							ErrBox	ErrBox
							45.85	458.2
							46.15	458.2
							46.15	470
							45.85	470
							45.85	458.2
							ErrBox	ErrBox
							46.85	458.1
							47.15	458.1
							47.15	470.3
							46.85	470.3
							46.85	458.1
							ErrBox	ErrBox
							47.85	458
							48.15	458
							48.15	470.6
							47.85	470.6
							47.85	458
							ErrBox	ErrBox
							48.85	458
							49.15	458
							49.15	470.8
							48.85	470.8
							48.85	458
							ErrBox	ErrBox
							49.85	459.3
							50.15	459.3
							50.15	469.7
							49.85	469.7
							49.85	459.3
							ErrBox	ErrBox
							50.85	458.5
							51.15	458.5
							51.15	470.5
							50.85	470.5
							50.85	458.5
							ErrBox	ErrBox
							51.85	460.2
							52.15	460.2
							52.15	469.6
							51.85	469.6
							51.85	460.2
							ErrBox	ErrBox
							52.85	458.7
							53.15	458.7
							53.15	471.3
							52.85	471.3
							52.85	458.7
							ErrBox	ErrBox
							53.85	457.6
							54.15	457.6
							54.15	472.8
							53.85	472.8
							53.85	457.6
							ErrBox	ErrBox
							54.85	461.1
							55.15	461.1
							55.15	470.3
							54.85	470.3
							54.85	461.1
							ErrBox	ErrBox
							55.85	457.6
							56.15	457.6
							56.15	473.8
							55.85	473.8
							55.85	457.6
							ErrBox	ErrBox
							56.85	461
							57.15	461
							57.15	470.4
							56.85	470.4
							56.85	461
							ErrBox	ErrBox
							57.85	460.6
							58.15	460.6
							58.15	471
							57.85	471
							57.85	460.6
							ErrBox	ErrBox
							58.85	460.9
							59.15	460.9
							59.15	470.9
							58.85	470.9
							58.85	460.9
							ErrBox	ErrBox
							59.85	460.1
							60.15	460.1
							60.15	471.9
							59.85	471.9
							59.85	460.1
							ErrBox	ErrBox
							60.85	459.7
							61.15	459.7
							61.15	472.7
							60.85	472.7
							60.85	459.7
							ErrBox	ErrBox
							61.85	460.4
							62.15	460.4
							62.15	473.2
							61.85	473.2
							61.85	460.4
							ErrBox	ErrBox
							62.85	461.5
							63.15	461.5
							63.15	472.3
							62.85	472.3
							62.85	461.5
							ErrBox	ErrBox
							63.85	459.2
							64.15	459.2
							64.15	474.6
							63.85	474.6
							63.85	459.2
							ErrBox	ErrBox
							64.85	460.9
							65.15	460.9
							65.15	472.9
							64.85	472.9
							64.85	460.9
							ErrBox	ErrBox
							65.85	459.1
							66.15	459.1
							66.15	474.7
							65.85	474.7
							65.85	459.1
							ErrBox	ErrBox
							66.85	460
							67.15	460
							67.15	474
							66.85	474
							66.85	460
							ErrBox	ErrBox
							67.85	461.4
							68.15	461.4
							68.15	472.8
							67.85	472.8
							67.85	461.4
							ErrBox	ErrBox
							68.85	460.2
							69.15	460.2
							69.15	474.6
							68.85	474.6
							68.85	460.2
							ErrBox	ErrBox
							69.85	462.4
							70.15	462.4
							70.15	473.2
							69.85	473.2
							69.85	462.4
							ErrBox	ErrBox
							70.85	460.4
							71.15	460.4
							71.15	475.6
							70.85	475.6
							70.85	460.4
							ErrBox	ErrBox
							71.85	460.7
							72.15	460.7
							72.15	475.9
							71.85	475.9
							71.85	460.7
							ErrBox	ErrBox
							72.85	461.6
							73.15	461.6
							73.15	475.2
							72.85	475.2
							72.85	461.6
							ErrBox	ErrBox
							73.85	463.1
							74.15	463.1
							74.15	474.1
							73.85	474.1
							73.85	463.1
							ErrBox	ErrBox
							74.85	462.2
							75.15	462.2
							75.15	475
							74.85	475
							74.85	462.2
							ErrBox	ErrBox
							75.85	462.9
							76.15	462.9
							76.15	475.7
							75.85	475.7
							75.85	462.9
							ErrBox	ErrBox
							76.85	463.2
							77.15	463.2
							77.15	475.4
							76.85	475.4
							76.85	463.2
							ErrBox	ErrBox
							77.85	463.2
							78.15	463.2
							78.15	476.2
							77.85	476.2
							77.85	463.2
							ErrBox	ErrBox
							78.85	463.7
							79.15	463.7
							79.15	475.7
							78.85	475.7
							78.85	463.7
							ErrBox	ErrBox
							79.85	463.8
							80.15	463.8
							80.15	475.6
							79.85	475.6
							79.85	463.8
							ErrBox	ErrBox
							80.85	464.1
							81.15	464.1
							81.15	475.9
							80.85	475.9
							80.85	464.1
							ErrBox	ErrBox
							81.85	463.9
							82.15	463.9
							82.15	476.3
							81.85	476.3
							81.85	463.9
							ErrBox	ErrBox
							82.85	465.2
							83.15	465.2
							83.15	475.2
							82.85	475.2
							82.85	465.2
							ErrBox	ErrBox
							83.85	464.2
							84.15	464.2
							84.15	479.2
							83.85	479.2
							83.85	464.2
							ErrBox	ErrBox
							84.85	466.9
							85.15	466.9
							85.15	476.5
							84.85	476.5
							84.85	466.9
							ErrBox	ErrBox
							85.85	466.9
							86.15	466.9
							86.15	477.7
							85.85	477.7
							85.85	466.9
							ErrBox	ErrBox
							86.85	463.5
							87.15	463.5
							87.15	481.9
							86.85	481.9
							86.85	463.5
							ErrBox	ErrBox
							87.85	468.2
							88.15	468.2
							88.15	478
							87.85	478
							87.85	468.2
							ErrBox	ErrBox
							88.85	466.4
							89.15	466.4
							89.15	480.6
							88.85	480.6
							88.85	466.4
							ErrBox	ErrBox
							89.85	468.5
							90.15	468.5
							90.15	479.3
							89.85	479.3
							89.85	468.5
							ErrBox	ErrBox
							90.85	468.1
							91.15	468.1
							91.15	480.3
							90.85	480.3
							90.85	468.1
							ErrBox	ErrBox
							91.85	466.5
							92.15	466.5
							92.15	483.1
							91.85	483.1
							91.85	466.5
							ErrBox	ErrBox
							92.85	470.6
							93.15	470.6
							93.15	480.2
							92.85	480.2
							92.85	470.6
							ErrBox	ErrBox
							93.85	472.9
							94.15	472.9
							94.15	485.7
							93.85	485.7
							93.85	472.9
							ErrBox	ErrBox
							94.85	476
							95.15	476
							95.15	489.8
							94.85	489.8
							94.85	476
							ErrBox	ErrBox

## Sheet: PlotDat6
Source sheet	data	435	4.43172e-06	448.5	0	435	0
Plot name	ProbDens3	435.03	4.52056e-06	450	0	494.97	0
Plot Type	16	435.06	4.61101e-06	450	1
1st free col	9	435.09	4.70309e-06	448.5	1
Sigma Level	2	435.12	4.79683e-06	448.5	0
Absolute Errs	TRUE	435.15	4.89226e-06	ErrBox	ErrBox
Symbol Type	1	435.18	4.98939e-06	450	0
Inverse Plot	FALSE	435.21	5.08827e-06	451.5	0
Color Plot	TRUE	435.24	5.1889e-06	451.5	1
3D plot	FALSE	435.27	5.29134e-06	450	1
Linear	FALSE	435.3	5.39559e-06	450	0
Data Range	AC9:AD104	435.33	5.50169e-06	ErrBox	ErrBox
Filled Symbols	TRUE	435.36	5.60966e-06	451.5	0
ConcAge	FALSE	435.39	5.71954e-06	453	0
ConcSwap	FALSE	435.42	5.83135e-06	453	2
1st Symbol-row	1	435.45	5.94513e-06	451.5	2
		435.48	6.0609e-06	451.5	0
		435.51	6.17869e-06	ErrBox	ErrBox
		435.54	6.29853e-06	454.5	0
		435.57	6.42046e-06	456	0
		435.6	6.54451e-06	456	6
		435.63	6.6707e-06	454.5	6
		435.66	6.79906e-06	454.5	0
		435.69	6.92964e-06	ErrBox	ErrBox
		435.72	7.06247e-06	456	0
		435.75	7.19756e-06	457.5	0
		435.78	7.33497e-06	457.5	4
		435.81	7.47472e-06	456	4
		435.84	7.61685e-06	456	0
		435.87	7.76139e-06	ErrBox	ErrBox
		435.9	7.90837e-06	457.5	0
		435.93	8.05784e-06	459	0
		435.96	8.22035e-06	459	6
		435.99	8.37549e-06	457.5	6
		436.02	8.53324e-06	457.5	0
		436.05	8.69366e-06	ErrBox	ErrBox
		436.08	8.85678e-06	459	0
		436.11	9.02263e-06	460.5	0
		436.14	9.19126e-06	460.5	8
		436.17	9.36272e-06	459	8
		436.2	9.53703e-06	459	0
		436.23	9.71424e-06	ErrBox	ErrBox
		436.26	9.8944e-06	460.5	0
		436.29	1.00775e-05	462	0
		436.32	1.02637e-05	462	7
		436.35	1.04529e-05	460.5	7
		436.38	1.06453e-05	460.5	0
		436.41	1.08408e-05	ErrBox	ErrBox
		436.44	1.10395e-05	462	0
		436.47	1.12415e-05	463.5	0
		436.5	1.14468e-05	463.5	5
		436.53	1.16554e-05	462	5
		436.56	1.18674e-05	462	0
		436.59	1.20828e-05	ErrBox	ErrBox
		436.62	1.23018e-05	463.5	0
		436.65	1.25242e-05	465	0
		436.68	1.27503e-05	465	12
		436.71	1.298e-05	463.5	12
		436.74	1.32133e-05	463.5	0
		436.77	1.34504e-05	ErrBox	ErrBox
		436.8	1.36913e-05	465	0
		436.83	1.39361e-05	466.5	0
		436.86	1.41847e-05	466.5	9
		436.89	1.44373e-05	465	9
		436.92	1.46939e-05	465	0
		436.95	1.49546e-05	ErrBox	ErrBox
		436.98	1.52193e-05	466.5	0
		437.01	1.54883e-05	468	0
		437.04	1.57615e-05	468	9
		437.07	1.60389e-05	466.5	9
		437.1	1.63208e-05	466.5	0
		437.13	1.6607e-05	ErrBox	ErrBox
		437.16	1.68977e-05	468	0
		437.19	1.71929e-05	469.5	0
		437.22	1.74928e-05	469.5	7
		437.25	1.77972e-05	468	7
		437.28	1.81065e-05	468	0
		437.31	1.84204e-05	ErrBox	ErrBox
		437.34	1.87393e-05	469.5	0
		437.37	1.90631e-05	471	0
		437.4	1.93918e-05	471	6
		437.43	1.97256e-05	469.5	6
		437.46	2.00645e-05	469.5	0
		437.49	2.04086e-05	ErrBox	ErrBox
		437.52	2.0758e-05	471	0
		437.55	2.11127e-05	472.5	0
		437.58	2.14729e-05	472.5	3
		437.61	2.18385e-05	471	3
		437.64	2.22096e-05	471	0
		437.67	2.25864e-05	ErrBox	ErrBox
		437.7	2.2969e-05	472.5	0
		437.73	2.33679e-05	474	0
		437.76	2.37626e-05	474	4
		437.79	2.41633e-05	472.5	4
		437.82	2.45701e-05	472.5	0
		437.85	2.4983e-05	ErrBox	ErrBox
		437.88	2.54022e-05	474	0
		437.91	2.58276e-05	475.5	0
		437.94	2.62595e-05	475.5	3
		437.97	2.66979e-05	474	3
		438	2.71429e-05	474	0
		438.03	2.75945e-05	ErrBox	ErrBox
		438.06	2.80529e-05	478.5	0
		438.09	2.85182e-05	480	0
		438.12	2.89905e-05	480	1
		438.15	2.94698e-05	478.5	1
		438.18	2.99563e-05	478.5	0
		438.21	3.04607e-05	ErrBox	ErrBox
		438.24	3.09622e-05	481.5	0
		438.27	3.14711e-05	483	0
		438.3	3.19877e-05	483	1
		438.33	3.2512e-05	481.5	1
		438.36	3.30441e-05	481.5	0
		438.39	3.35842e-05	ErrBox	ErrBox
		438.42	3.41322e-05
		438.45	3.46885e-05
		438.48	3.5253e-05
		438.51	3.5826e-05
		438.54	3.64074e-05
		438.57	3.69975e-05
		438.6	3.75964e-05
		438.63	3.82042e-05
		438.66	3.88211e-05
		438.69	3.94471e-05
		438.72	4.00824e-05
		438.75	4.07272e-05
		438.78	4.13816e-05
		438.81	4.20457e-05
		438.84	4.27197e-05
		438.87	4.34038e-05
		438.9	4.40981e-05
		438.93	4.48027e-05
		438.96	4.55178e-05
		438.99	4.62436e-05
		439.02	4.69802e-05
		439.05	4.77278e-05
		439.08	4.84866e-05
		439.11	4.92568e-05
		439.14	5.00384e-05
		439.17	5.08318e-05
		439.2	5.16371e-05
		439.23	5.24545e-05
		439.26	5.32842e-05
		439.29	5.41263e-05
		439.32	5.49812e-05
		439.35	5.58489e-05
		439.38	5.67297e-05
		439.41	5.76238e-05
		439.44	5.85314e-05
		439.47	5.94528e-05
		439.5	6.03881e-05
		439.53	6.13377e-05
		439.56	6.23017e-05
		439.59	6.32803e-05
		439.62	6.42739e-05
		439.65	6.52827e-05
		439.68	6.63068e-05
		439.71	6.73467e-05
		439.74	6.84025e-05
		439.77	6.94745e-05
		439.8	7.05631e-05
		439.83	7.16684e-05
		439.86	7.27908e-05
		439.89	7.39305e-05
		439.92	7.50879e-05
		439.95	7.62633e-05
		439.98	7.74569e-05
		440.01	7.86691e-05
		440.04	7.99003e-05
		440.07	8.11506e-05
		440.1	8.24206e-05
		440.13	8.37211e-05
		440.16	8.50423e-05
		440.19	8.63742e-05
		440.22	8.77271e-05
		440.25	8.91014e-05
		440.28	9.04976e-05
		440.31	9.19159e-05
		440.34	9.33569e-05
		440.37	9.48208e-05
		440.4	9.63081e-05
		440.43	9.78192e-05
		440.46	9.93546e-05
		440.49	0.000100915
		440.52	0.0001025
		440.55	0.000104111
		440.58	0.000105747
		440.61	0.000107411
		440.64	0.000109101
		440.67	0.000110819
		440.7	0.000112565
		440.73	0.000114339
		440.76	0.000116142
		440.79	0.000117975
		440.82	0.000119838
		440.85	0.000121731
		440.88	0.000123656
		440.91	0.000125612
		440.94	0.000127611
		440.97	0.000129644
		441	0.000131701
		441.03	0.000133791
		441.06	0.000135916
		441.09	0.000138077
		441.12	0.000140274
		441.15	0.000142507
		441.18	0.000144778
		441.21	0.000147086
		441.24	0.000149434
		441.27	0.000151821
		441.3	0.000154248
		441.33	0.000156726
		441.36	0.000159247
		441.39	0.000161799
		441.42	0.000164395
		441.45	0.000167035
		441.48	0.000169719
		441.51	0.000172449
		441.54	0.000175225
		441.57	0.000178049
		441.6	0.00018092
		441.63	0.00018384
		441.66	0.000186809
		441.69	0.000189829
		441.72	0.0001929
		441.75	0.000196023
		441.78	0.0001992
		441.81	0.000202431
		441.84	0.000205716
		441.87	0.000209057
		441.9	0.000212456
		441.93	0.000215912
		441.96	0.000219426
		441.99	0.000223001
		442.02	0.000226636
		442.05	0.000230334
		442.08	0.000234093
		442.11	0.000237917
		442.14	0.000241806
		442.17	0.000245771
		442.2	0.000249793
		442.23	0.000253883
		442.26	0.000258043
		442.29	0.000262272
		442.32	0.000266574
		442.35	0.000270947
		442.38	0.000275395
		442.41	0.000279917
		442.44	0.000284515
		442.47	0.000289191
		442.5	0.000293945
		442.53	0.000298778
		442.56	0.000303692
		442.59	0.000308689
		442.62	0.000313768
		442.65	0.000318932
		442.68	0.000324182
		442.71	0.000329518
		442.74	0.000334943
		442.77	0.000340457
		442.8	0.000346062
		442.83	0.000351759
		442.86	0.00035755
		442.89	0.000363435
		442.92	0.000369416
		442.95	0.000375495
		442.98	0.000381672
		443.01	0.000387949
		443.04	0.000394327
		443.07	0.000400808
		443.1	0.000407394
		443.13	0.000414084
		443.16	0.000420881
		443.19	0.000427798
		443.22	0.000434813
		443.25	0.000441939
		443.28	0.000449178
		443.31	0.000456541
		443.34	0.000464009
		443.37	0.000471593
		443.4	0.000479296
		443.43	0.000487117
		443.46	0.00049506
		443.49	0.000503124
		443.52	0.000511312
		443.55	0.000519625
		443.58	0.000528064
		443.61	0.000536631
		443.64	0.000545328
		443.67	0.000554154
		443.7	0.000563113
		443.73	0.000572216
		443.76	0.000581444
		443.79	0.000590808
		443.82	0.00060032
		443.85	0.000609972
		443.88	0.000619754
		443.91	0.000629678
		443.94	0.000639745
		443.97	0.000649957
		444	0.000660315
		444.03	0.000670821
		444.06	0.000681475
		444.09	0.00069228
		444.12	0.000703236
		444.15	0.000714345
		444.18	0.000725609
		444.21	0.000737028
		444.24	0.000748604
		444.27	0.000760349
		444.3	0.000772243
		444.33	0.000784299
		444.36	0.000796517
		444.39	0.000808898
		444.42	0.000821444
		444.45	0.000834157
		444.48	0.000847036
		444.51	0.000860085
		444.54	0.000873303
		444.57	0.000886693
		444.6	0.000900255
		444.63	0.000913991
		444.66	0.000927902
		444.69	0.000941988
		444.72	0.000956252
		444.75	0.000970706
		444.78	0.000985328
		444.81	0.00100013
		444.84	0.00101512
		444.87	0.00103029
		444.9	0.00104564
		444.93	0.00106118
		444.96	0.0010769
		444.99	0.00109282
		445.02	0.00110893
		445.05	0.00112522
		445.08	0.0011417
		445.11	0.00115837
		445.14	0.00117524
		445.17	0.0011923
		445.2	0.00120956
		445.23	0.00122703
		445.26	0.00124469
		445.29	0.00126253
		445.32	0.00128058
		445.35	0.00129883
		445.38	0.00131728
		445.41	0.00133592
		445.44	0.00135478
		445.47	0.00137383
		445.5	0.00139311
		445.53	0.00141257
		445.56	0.00143225
		445.59	0.00145213
		445.62	0.00147222
		445.65	0.00149251
		445.68	0.00151302
		445.71	0.00153374
		445.74	0.00155467
		445.77	0.00157582
		445.8	0.00159717
		445.83	0.00161875
		445.86	0.00164053
		445.89	0.00166253
		445.92	0.00168475
		445.95	0.00170719
		445.98	0.00172985
		446.01	0.00175272
		446.04	0.00177582
		446.07	0.00179915
		446.1	0.00182269
		446.13	0.00184645
		446.16	0.00187043
		446.19	0.00189464
		446.22	0.00191908
		446.25	0.00194374
		446.28	0.00196865
		446.31	0.00199377
		446.34	0.00201911
		446.37	0.00204469
		446.4	0.00207049
		446.43	0.00209653
		446.46	0.0021228
		446.49	0.0021493
		446.52	0.00217603
		446.55	0.00220301
		446.58	0.00223023
		446.61	0.00225767
		446.64	0.00228535
		446.67	0.00231327
		446.7	0.00234143
		446.73	0.00236983
		446.76	0.00239848
		446.79	0.00242737
		446.82	0.00245649
		446.85	0.00248586
		446.88	0.00251548
		446.91	0.00254535
		446.94	0.00257547
		446.97	0.00260583
		447	0.00263644
		447.03	0.0026673
		447.06	0.00269841
		447.09	0.00272977
		447.12	0.00276139
		447.15	0.00279326
		447.18	0.00282539
		447.21	0.00285778
		447.24	0.00289042
		447.27	0.00292333
		447.3	0.00295649
		447.33	0.00298992
		447.36	0.00302361
		447.39	0.00305757
		447.42	0.00309179
		447.45	0.00312629
		447.48	0.00316105
		447.51	0.00319608
		447.54	0.00323138
		447.57	0.00326696
		447.6	0.00330281
		447.63	0.00333893
		447.66	0.00337535
		447.69	0.00341203
		447.72	0.00344899
		447.75	0.00348623
		447.78	0.00352376
		447.81	0.00356157
		447.84	0.00359967
		447.87	0.00363806
		447.9	0.00367673
		447.93	0.0037157
		447.96	0.00375496
		447.99	0.00379452
		448.02	0.00383437
		448.05	0.00387453
		448.08	0.00391498
		448.11	0.00395573
		448.14	0.00399678
		448.17	0.00403815
		448.2	0.00407982
		448.23	0.00412179
		448.26	0.00416408
		448.29	0.00420667
		448.32	0.0042496
		448.35	0.00429282
		448.38	0.00433637
		448.41	0.00438025
		448.44	0.00442443
		448.47	0.00446896
		448.5	0.00451379
		448.53	0.00455896
		448.56	0.00460445
		448.59	0.00465028
		448.62	0.00469645
		448.65	0.00474295
		448.68	0.00478978
		448.71	0.00483695
		448.74	0.00488447
		448.77	0.00493233
		448.8	0.00498053
		448.83	0.00502909
		448.86	0.00507799
		448.89	0.00512725
		448.92	0.00517687
		448.95	0.00522684
		448.98	0.00527717
		449.01	0.00532786
		449.04	0.00537893
		449.07	0.00543035
		449.1	0.00548214
		449.13	0.0055343
		449.16	0.00558683
		449.19	0.00563973
		449.22	0.00569303
		449.25	0.00574669
		449.28	0.00580074
		449.31	0.00585517
		449.34	0.00590999
		449.37	0.0059652
		449.4	0.00602081
		449.43	0.00607681
		449.46	0.0061332
		449.49	0.00618999
		449.52	0.00624719
		449.55	0.00630479
		449.58	0.0063628
		449.61	0.00642122
		449.64	0.00648005
		449.67	0.00653929
		449.7	0.00659896
		449.73	0.00665906
		449.76	0.00671959
		449.79	0.00678053
		449.82	0.00684189
		449.85	0.00690369
		449.88	0.00696593
		449.91	0.0070286
		449.94	0.00709173
		449.97	0.00715529
		450	0.00721929
		450.03	0.00728376
		450.06	0.00734869
		450.09	0.00741406
		450.12	0.00747989
		450.15	0.00754618
		450.18	0.00761295
		450.21	0.00768018
		450.24	0.00774788
		450.27	0.00781605
		450.3	0.0078847
		450.33	0.00795383
		450.36	0.00802345
		450.39	0.00809356
		450.42	0.00816417
		450.45	0.00823528
		450.48	0.00830688
		450.51	0.00837898
		450.54	0.00845158
		450.57	0.00852469
		450.6	0.00859832
		450.63	0.00867246
		450.66	0.00874713
		450.69	0.00882231
		450.72	0.00889802
		450.75	0.00897427
		450.78	0.00905106
		450.81	0.00912837
		450.84	0.00920623
		450.87	0.00928464
		450.9	0.00936359
		450.93	0.0094431
		450.96	0.00952316
		450.99	0.00960378
		451.02	0.00968497
		451.05	0.00976672
		451.08	0.00984904
		451.11	0.00993194
		451.14	0.0100154
		451.17	0.0100995
		451.2	0.0101841
		451.23	0.0102693
		451.26	0.0103552
		451.29	0.0104416
		451.32	0.0105286
		451.35	0.0106162
		451.38	0.0107045
		451.41	0.0107933
		451.44	0.0108827
		451.47	0.0109728
		451.5	0.0110635
		451.53	0.0111548
		451.56	0.0112467
		451.59	0.0113393
		451.62	0.0114325
		451.65	0.0115263
		451.68	0.0116207
		451.71	0.0117158
		451.74	0.0118116
		451.77	0.0119079
		451.8	0.012005
		451.83	0.0121026
		451.86	0.012201
		451.89	0.0122999
		451.92	0.0123995
		451.95	0.0124998
		451.98	0.0126008
		452.01	0.0127024
		452.04	0.0128046
		452.07	0.0129075
		452.1	0.0130111
		452.13	0.0131153
		452.16	0.0132202
		452.19	0.0133258
		452.22	0.013432
		452.25	0.0135389
		452.28	0.0136465
		452.31	0.0137547
		452.34	0.0138636
		452.37	0.0139731
		452.4	0.0140833
		452.43	0.0141942
		452.46	0.0143058
		452.49	0.014418
		452.52	0.0145308
		452.55	0.0146443
		452.58	0.0147585
		452.61	0.0148733
		452.64	0.0149888
		452.67	0.0151049
		452.7	0.0152217
		452.73	0.0153392
		452.76	0.0154572
		452.79	0.0155759
		452.82	0.0156953
		452.85	0.0158153
		452.88	0.0159359
		452.91	0.0160571
		452.94	0.016179
		452.97	0.0163015
		453	0.0164246
		453.03	0.0165483
		453.06	0.0166726
		453.09	0.0167975
		453.12	0.016923
		453.15	0.0170491
		453.18	0.0171758
		453.21	0.0173031
		453.24	0.0174309
		453.27	0.0175593
		453.3	0.0176883
		453.33	0.0178178
		453.36	0.0179479
		453.39	0.0180785
		453.42	0.0182097
		453.45	0.0183414
		453.48	0.0184736
		453.51	0.0186064
		453.54	0.0187396
		453.57	0.0188734
		453.6	0.0190076
		453.63	0.0191424
		453.66	0.0192776
		453.69	0.0194133
		453.72	0.0195495
		453.75	0.0196861
		453.78	0.0198232
		453.81	0.0199607
		453.84	0.0200987
		453.87	0.0202371
		453.9	0.0203759
		453.93	0.0205151
		453.96	0.0206548
		453.99	0.0207948
		454.02	0.0209352
		454.05	0.021076
		454.08	0.0212172
		454.11	0.0213587
		454.14	0.0215006
		454.17	0.0216429
		454.2	0.0217855
		454.23	0.0219284
		454.26	0.0220716
		454.29	0.0222152
		454.32	0.0223591
		454.35	0.0225032
		454.38	0.0226477
		454.41	0.0227925
		454.44	0.0229375
		454.47	0.0230828
		454.5	0.0232284
		454.53	0.0233742
		454.56	0.0235203
		454.59	0.0236666
		454.62	0.0238131
		454.65	0.0239599
		454.68	0.0241069
		454.71	0.0242541
		454.74	0.0244016
		454.77	0.0245492
		454.8	0.024697
		454.83	0.024845
		454.86	0.0249931
		454.89	0.0251415
		454.92	0.02529
		454.95	0.0254387
		454.98	0.0255875
		455.01	0.0257365
		455.04	0.0258856
		455.07	0.0260349
		455.1	0.0261843
		455.13	0.0263338
		455.16	0.0264835
		455.19	0.0266332
		455.22	0.0267831
		455.25	0.0269331
		455.28	0.0270832
		455.31	0.0272334
		455.34	0.0273836
		455.37	0.027534
		455.4	0.0276844
		455.43	0.027835
		455.46	0.0279855
		455.49	0.0281362
		455.52	0.0282869
		455.55	0.0284377
		455.58	0.0285885
		455.61	0.0287394
		455.64	0.0288904
		455.67	0.0290414
		455.7	0.0291924
		455.73	0.0293435
		455.76	0.0294946
		455.79	0.0296457
		455.82	0.0297968
		455.85	0.029948
		455.88	0.0300992
		455.91	0.0302504
		455.94	0.0304016
		455.97	0.0305528
		456	0.030704
		456.03	0.0308553
		456.06	0.0310065
		456.09	0.0311577
		456.12	0.0313089
		456.15	0.0314601
		456.18	0.0316113
		456.21	0.0317624
		456.24	0.0319135
		456.27	0.0320646
		456.3	0.0322156
		456.33	0.0323667
		456.36	0.0325176
		456.39	0.0326686
		456.42	0.0328194
		456.45	0.0329702
		456.48	0.033121
		456.51	0.0332717
		456.54	0.0334223
		456.57	0.0335728
		456.6	0.0337233
		456.63	0.0338737
		456.66	0.034024
		456.69	0.0341742
		456.72	0.0343243
		456.75	0.0344743
		456.78	0.0346242
		456.81	0.034774
		456.84	0.0349237
		456.87	0.0350732
		456.9	0.0352226
		456.93	0.0353719
		456.96	0.035521
		456.99	0.03567
		457.02	0.0358188
		457.05	0.0359675
		457.08	0.036116
		457.11	0.0362644
		457.14	0.0364125
		457.17	0.0365605
		457.2	0.0367083
		457.23	0.0368558
		457.26	0.0370032
		457.29	0.0371504
		457.32	0.0372973
		457.35	0.037444
		457.38	0.0375905
		457.41	0.0377367
		457.44	0.0378827
		457.47	0.0380285
		457.5	0.0381739
		457.53	0.0383191
		457.56	0.0384641
		457.59	0.0386087
		457.62	0.0387531
		457.65	0.0388971
		457.68	0.0390408
		457.71	0.0391843
		457.74	0.0393274
		457.77	0.0394701
		457.8	0.0396126
		457.83	0.0397547
		457.86	0.0398964
		457.89	0.0400378
		457.92	0.0401788
		457.95	0.0403194
		457.98	0.0404597
		458.01	0.0405995
		458.04	0.040739
		458.07	0.040878
		458.1	0.0410167
		458.13	0.0411549
		458.16	0.0412927
		458.19	0.04143
		458.22	0.0415669
		458.25	0.0417034
		458.28	0.0418394
		458.31	0.0419749
		458.34	0.04211
		458.37	0.0422446
		458.4	0.0423787
		458.43	0.0425124
		458.46	0.0426455
		458.49	0.0427781
		458.52	0.0429103
		458.55	0.0430419
		458.58	0.043173
		458.61	0.0433035
		458.64	0.0434336
		458.67	0.0435631
		458.7	0.0436921
		458.73	0.0438205
		458.76	0.0439484
		458.79	0.0440757
		458.82	0.0442025
		458.85	0.0443287
		458.88	0.0444544
		458.91	0.0445795
		458.94	0.044704
		458.97	0.0448279
		459	0.0449513
		459.03	0.0450741
		459.06	0.0451963
		459.09	0.0453179
		459.12	0.0454389
		459.15	0.0455593
		459.18	0.0456792
		459.21	0.0457984
		459.24	0.0459171
		459.27	0.0460351
		459.3	0.0461526
		459.33	0.0462694
		459.36	0.0463857
		459.39	0.0465013
		459.42	0.0466164
		459.45	0.0467308
		459.48	0.0468447
		459.51	0.0469579
		459.54	0.0470706
		459.57	0.0471826
		459.6	0.0472941
		459.63	0.0474049
		459.66	0.0475152
		459.69	0.0476248
		459.72	0.0477339
		459.75	0.0478423
		459.78	0.0479502
		459.81	0.0480575
		459.84	0.0481642
		459.87	0.0482703
		459.9	0.0483758
		459.93	0.0484808
		459.96	0.0485851
		459.99	0.0486889
		460.02	0.0487921
		460.05	0.0488948
		460.08	0.0489969
		460.11	0.0490984
		460.14	0.0491993
		460.17	0.0492997
		460.2	0.0493995
		460.23	0.0494988
		460.26	0.0495976
		460.29	0.0496957
		460.32	0.0497934
		460.35	0.0498905
		460.38	0.0499871
		460.41	0.0500831
		460.44	0.0501786
		460.47	0.0502736
		460.5	0.0503681
		460.53	0.050462
		460.56	0.0505554
		460.59	0.0506483
		460.62	0.0507408
		460.65	0.0508327
		460.68	0.0509241
		460.71	0.051015
		460.74	0.0511054
		460.77	0.0511953
		460.8	0.0512848
		460.83	0.0513737
		460.86	0.0514622
		460.89	0.0515502
		460.92	0.0516377
		460.95	0.0517247
		460.98	0.0518113
		461.01	0.0518974
		461.04	0.0519831
		461.07	0.0520682
		461.1	0.052153
		461.13	0.0522372
		461.16	0.052321
		461.19	0.0524043
		461.22	0.0524872
		461.25	0.0525697
		461.28	0.0526516
		461.31	0.0527332
		461.34	0.0528143
		461.37	0.0528949
		461.4	0.0529751
		461.43	0.0530548
		461.46	0.0531341
		461.49	0.0532129
		461.52	0.0532913
		461.55	0.0533692
		461.58	0.0534467
		461.61	0.0535237
		461.64	0.0536003
		461.67	0.0536764
		461.7	0.0537521
		461.73	0.0538273
		461.76	0.053902
		461.79	0.0539763
		461.82	0.0540501
		461.85	0.0541235
		461.88	0.0541964
		461.91	0.0542688
		461.94	0.0543407
		461.97	0.0544121
		462	0.0544831
		462.03	0.0545536
		462.06	0.0546235
		462.09	0.054693
		462.12	0.054762
		462.15	0.0548304
		462.18	0.0548983
		462.21	0.0549658
		462.24	0.0550326
		462.27	0.055099
		462.3	0.0551648
		462.33	0.0552301
		462.36	0.0552948
		462.39	0.0553589
		462.42	0.0554225
		462.45	0.0554855
		462.48	0.0555479
		462.51	0.0556097
		462.54	0.0556709
		462.57	0.0557315
		462.6	0.0557915
		462.63	0.0558508
		462.66	0.0559095
		462.69	0.0559676
		462.72	0.056025
		462.75	0.0560817
		462.78	0.0561378
		462.81	0.0561931
		462.84	0.0562478
		462.87	0.0563018
		462.9	0.056355
		462.93	0.0564075
		462.96	0.0564592
		462.99	0.0565102
		463.02	0.0565605
		463.05	0.0566099
		463.08	0.0566586
		463.11	0.0567064
		463.14	0.0567535
		463.17	0.0567997
		463.2	0.0568451
		463.23	0.0568896
		463.26	0.0569332
		463.29	0.056976
		463.32	0.0570179
		463.35	0.0570589
		463.38	0.0570989
		463.41	0.057138
		463.44	0.0571762
		463.47	0.0572135
		463.5	0.0572497
		463.53	0.057285
		463.56	0.0573193
		463.59	0.0573525
		463.62	0.0573848
		463.65	0.057416
		463.68	0.0574461
		463.71	0.0574752
		463.74	0.0575032
		463.77	0.0575301
		463.8	0.057556
		463.83	0.0575807
		463.86	0.0576042
		463.89	0.0576267
		463.92	0.0576479
		463.95	0.057668
		463.98	0.0576869
		464.01	0.0577047
		464.04	0.0577212
		464.07	0.0577365
		464.1	0.0577505
		464.13	0.0577634
		464.16	0.0577749
		464.19	0.0577852
		464.22	0.0577942
		464.25	0.0578019
		464.28	0.0578084
		464.31	0.0578135
		464.34	0.0578173
		464.37	0.0578197
		464.4	0.0578208
		464.43	0.0578206
		464.46	0.0578189
		464.49	0.0578159
		464.52	0.0578116
		464.55	0.0578058
		464.58	0.0577986
		464.61	0.05779
		464.64	0.05778
		464.67	0.0577686
		464.7	0.0577557
		464.73	0.0577414
		464.76	0.0577256
		464.79	0.0577084
		464.82	0.0576897
		464.85	0.0576696
		464.88	0.057648
		464.91	0.0576249
		464.94	0.0576003
		464.97	0.0575742
		465	0.0575466
		465.03	0.0575175
		465.06	0.057487
		465.09	0.0574549
		465.12	0.0574213
		465.15	0.0573862
		465.18	0.0573496
		465.21	0.0573115
		465.24	0.0572718
		465.27	0.0572307
		465.3	0.057188
		465.33	0.0571438
		465.36	0.0570981
		465.39	0.0570509
		465.42	0.0570022
		465.45	0.056952
		465.48	0.0569002
		465.51	0.0568469
		465.54	0.0567922
		465.57	0.0567359
		465.6	0.0566782
		465.63	0.0566189
		465.66	0.0565582
		465.69	0.056496
		465.72	0.0564323
		465.75	0.0563671
		465.78	0.0563005
		465.81	0.0562324
		465.84	0.0561628
		465.87	0.0560918
		465.9	0.0560194
		465.93	0.0559455
		465.96	0.0558702
		465.99	0.0557935
		466.02	0.0557154
		466.05	0.055636
		466.08	0.0555551
		466.11	0.0554728
		466.14	0.0553892
		466.17	0.0553043
		466.2	0.055218
		466.23	0.0551303
		466.26	0.0550414
		466.29	0.0549511
		466.32	0.0548596
		466.35	0.0547668
		466.38	0.0546727
		466.41	0.0545774
		466.44	0.0544808
		466.47	0.054383
		466.5	0.054284
		466.53	0.0541838
		466.56	0.0540824
		466.59	0.0539799
		466.62	0.0538762
		466.65	0.0537713
		466.68	0.0536654
		466.71	0.0535583
		466.74	0.0534502
		466.77	0.053341
		466.8	0.0532307
		466.83	0.0531194
		466.86	0.0530071
		466.89	0.0528938
		466.92	0.0527795
		466.95	0.0526642
		466.98	0.0525479
		467.01	0.0524308
		467.04	0.0523127
		467.07	0.0521937
		467.1	0.0520738
		467.13	0.051953
		467.16	0.0518314
		467.19	0.051709
		467.22	0.0515858
		467.25	0.0514617
		467.28	0.0513369
		467.31	0.0512113
		467.34	0.051085
		467.37	0.050958
		467.4	0.0508302
		467.43	0.0507017
		467.46	0.0505726
		467.49	0.0504428
		467.52	0.0503124
		467.55	0.0501814
		467.58	0.0500497
		467.61	0.0499175
		467.64	0.0497847
		467.67	0.0496513
		467.7	0.0495174
		467.73	0.049383
		467.76	0.0492481
		467.79	0.0491127
		467.82	0.0489768
		467.85	0.0488404
		467.88	0.0487037
		467.91	0.0485664
		467.94	0.0484288
		467.97	0.0482908
		468	0.0481524
		468.03	0.0480136
		468.06	0.0478745
		468.09	0.047735
		468.12	0.0475953
		468.15	0.0474552
		468.18	0.0473148
		468.21	0.0471741
		468.24	0.0470332
		468.27	0.0468919
		468.3	0.0467505
		468.33	0.0466088
		468.36	0.0464669
		468.39	0.0463248
		468.42	0.0461825
		468.45	0.04604
		468.48	0.0458974
		468.51	0.0457546
		468.54	0.0456116
		468.57	0.0454685
		468.6	0.0453252
		468.63	0.0451819
		468.66	0.0450384
		468.69	0.0448948
		468.72	0.0447511
		468.75	0.0446073
		468.78	0.0444635
		468.81	0.0443195
		468.84	0.0441755
		468.87	0.0440315
		468.9	0.0438874
		468.93	0.0437433
		468.96	0.0435991
		468.99	0.0434549
		469.02	0.0433107
		469.05	0.0431665
		469.08	0.0430223
		469.11	0.042878
		469.14	0.0427338
		469.17	0.0425896
		469.2	0.0424454
		469.23	0.0423012
		469.26	0.042157
		469.29	0.0420128
		469.32	0.0418687
		469.35	0.0417246
		469.38	0.0415805
		469.41	0.0414365
		469.44	0.0412925
		469.47	0.0411486
		469.5	0.0410047
		469.53	0.0408608
		469.56	0.040717
		469.59	0.0405733
		469.62	0.0404296
		469.65	0.040286
		469.68	0.0401424
		469.71	0.0399989
		469.74	0.0398554
		469.77	0.039712
		469.8	0.0395687
		469.83	0.0394254
		469.86	0.0392822
		469.89	0.039139
		469.92	0.0389959
		469.95	0.0388529
		469.98	0.03871
		470.01	0.0385671
		470.04	0.0384242
		470.07	0.0382814
		470.1	0.0381387
		470.13	0.0379961
		470.16	0.0378535
		470.19	0.0377109
		470.22	0.0375684
		470.25	0.037426
		470.28	0.0372837
		470.31	0.0371414
		470.34	0.0369991
		470.37	0.0368569
		470.4	0.0367148
		470.43	0.0365727
		470.46	0.0364307
		470.49	0.0362887
		470.52	0.0361467
		470.55	0.0360048
		470.58	0.035863
		470.61	0.0357212
		470.64	0.0355794
		470.67	0.0354377
		470.7	0.035296
		470.73	0.0351543
		470.76	0.0350127
		470.79	0.0348711
		470.82	0.0347296
		470.85	0.0345881
		470.88	0.0344466
		470.91	0.0343052
		470.94	0.0341637
		470.97	0.0340224
		471	0.033881
		471.03	0.0337397
		471.06	0.0335983
		471.09	0.0334571
		471.12	0.0333158
		471.15	0.0331746
		471.18	0.0330333
		471.21	0.0328921
		471.24	0.032751
		471.27	0.0326098
		471.3	0.0324687
		471.33	0.0323276
		471.36	0.0321865
		471.39	0.0320454
		471.42	0.0319043
		471.45	0.0317633
		471.48	0.0316222
		471.51	0.0314812
		471.54	0.0313402
		471.57	0.0311992
		471.6	0.0310583
		471.63	0.0309173
		471.66	0.0307764
		471.69	0.0306355
		471.72	0.0304946
		471.75	0.0303538
		471.78	0.0302129
		471.81	0.0300721
		471.84	0.0299313
		471.87	0.0297905
		471.9	0.0296498
		471.93	0.029509
		471.96	0.0293683
		471.99	0.0292277
		472.02	0.029087
		472.05	0.0289464
		472.08	0.0288059
		472.11	0.0286653
		472.14	0.0285248
		472.17	0.0283844
		472.2	0.028244
		472.23	0.0281036
		472.26	0.0279633
		472.29	0.027823
		472.32	0.0276828
		472.35	0.0275426
		472.38	0.0274025
		472.41	0.0272624
		472.44	0.0271224
		472.47	0.0269825
		472.5	0.0268426
		472.53	0.0267028
		472.56	0.026563
		472.59	0.0264234
		472.62	0.0262838
		472.65	0.0261443
		472.68	0.0260049
		472.71	0.0258655
		472.74	0.0257263
		472.77	0.0255872
		472.8	0.0254481
		472.83	0.0253092
		472.86	0.0251704
		472.89	0.0250316
		472.92	0.024893
		472.95	0.0247545
		472.98	0.0246161
		473.01	0.0244779
		473.04	0.0243398
		473.07	0.0242018
		473.1	0.0240639
		473.13	0.0239262
		473.16	0.0237886
		473.19	0.0236512
		473.22	0.023514
		473.25	0.0233768
		473.28	0.0232399
		473.31	0.0231031
		473.34	0.0229665
		473.37	0.0228301
		473.4	0.0226939
		473.43	0.0225578
		473.46	0.0224219
		473.49	0.0222863
		473.52	0.0221508
		473.55	0.0220155
		473.58	0.0218804
		473.61	0.0217456
		473.64	0.0216109
		473.67	0.0214765
		473.7	0.0213423
		473.73	0.0212084
		473.76	0.0210747
		473.79	0.0209412
		473.82	0.020808
		473.85	0.020675
		473.88	0.0205422
		473.91	0.0204098
		473.94	0.0202776
		473.97	0.0201457
		474	0.020014
		474.03	0.0198826
		474.06	0.0197516
		474.09	0.0196208
		474.12	0.0194903
		474.15	0.0193601
		474.18	0.0192302
		474.21	0.0191006
		474.24	0.0189714
		474.27	0.0188424
		474.3	0.0187138
		474.33	0.0185855
		474.36	0.0184576
		474.39	0.01833
		474.42	0.0182027
		474.45	0.0180758
		474.48	0.0179493
		474.51	0.0178231
		474.54	0.0176972
		474.57	0.0175718
		474.6	0.0174467
		474.63	0.017322
		474.66	0.0171977
		474.69	0.0170737
		474.72	0.0169502
		474.75	0.0168271
		474.78	0.0167043
		474.81	0.016582
		474.84	0.0164601
		474.87	0.0163386
		474.9	0.0162176
		474.93	0.0160969
		474.96	0.0159767
		474.99	0.0158569
		475.02	0.0157376
		475.05	0.0156187
		475.08	0.0155003
		475.11	0.0153824
		475.14	0.0152649
		475.17	0.0151478
		475.2	0.0150313
		475.23	0.0149152
		475.26	0.0147995
		475.29	0.0146844
		475.32	0.0145698
		475.35	0.0144556
		475.38	0.014342
		475.41	0.0142288
		475.44	0.0141162
		475.47	0.014004
		475.5	0.0138924
		475.53	0.0137813
		475.56	0.0136707
		475.59	0.0135607
		475.62	0.0134512
		475.65	0.0133422
		475.68	0.0132337
		475.71	0.0131258
		475.74	0.0130185
		475.77	0.0129116
		475.8	0.0128054
		475.83	0.0126997
		475.86	0.0125946
		475.89	0.01249
		475.92	0.012386
		475.95	0.0122826
		475.98	0.0121797
		476.01	0.0120774
		476.04	0.0119758
		476.07	0.0118747
		476.1	0.0117742
		476.13	0.0116742
		476.16	0.0115749
		476.19	0.0114762
		476.22	0.0113781
		476.25	0.0112805
		476.28	0.0111836
		476.31	0.0110873
		476.34	0.0109917
		476.37	0.0108966
		476.4	0.0108021
		476.43	0.0107083
		476.46	0.0106151
		476.49	0.0105225
		476.52	0.0104306
		476.55	0.0103393
		476.58	0.0102486
		476.61	0.0101585
		476.64	0.0100691
		476.67	0.00998036
		476.7	0.00989223
		476.73	0.00980474
		476.76	0.0097179
		476.79	0.00963169
		476.82	0.00954615
		476.85	0.00946125
		476.88	0.009377
		476.91	0.0092934
		476.94	0.00921046
		476.97	0.00912817
		477	0.00904653
		477.03	0.00896555
		477.06	0.00888522
		477.09	0.00880556
		477.12	0.00872655
		477.15	0.0086482
		477.18	0.00857051
		477.21	0.00849346
		477.24	0.00841707
		477.27	0.00834136
		477.3	0.00826631
		477.33	0.00819191
		477.36	0.00811817
		477.39	0.00804509
		477.42	0.00797267
		477.45	0.0079009
		477.48	0.0078298
		477.51	0.00775935
		477.54	0.00768956
		477.57	0.00762042
		477.6	0.00755193
		477.63	0.0074841
		477.66	0.00741692
		477.69	0.00735039
		477.72	0.00728451
		477.75	0.00721928
		477.78	0.00715469
		477.81	0.00709074
		477.84	0.00702744
		477.87	0.00696477
		477.9	0.00690275
		477.93	0.00684135
		477.96	0.00678059
		477.99	0.00672047
		478.02	0.00666097
		478.05	0.00660211
		478.08	0.00654386
		478.11	0.00648624
		478.14	0.00642923
		478.17	0.00637284
		478.2	0.00631706
		478.23	0.0062619
		478.26	0.00620734
		478.29	0.00615339
		478.32	0.00610003
		478.35	0.00604728
		478.38	0.00599511
		478.41	0.00594354
		478.44	0.00589255
		478.47	0.00584214
		478.5	0.00579231
		478.53	0.00574305
		478.56	0.00569437
		478.59	0.00564626
		478.62	0.00559871
		478.65	0.00555172
		478.68	0.00550529
		478.71	0.0054594
		478.74	0.00541406
		478.77	0.00536927
		478.8	0.00532501
		478.83	0.00528128
		478.86	0.00523808
		478.89	0.00519541
		478.92	0.00515325
		478.95	0.00511161
		478.98	0.00507048
		479.01	0.00502984
		479.04	0.00498971
		479.07	0.00495008
		479.1	0.00491093
		479.13	0.00487227
		479.16	0.0048341
		479.19	0.0047964
		479.22	0.00475917
		479.25	0.0047224
		479.28	0.00468609
		479.31	0.00465024
		479.34	0.00461484
		479.37	0.00457988
		479.4	0.00454536
		479.43	0.00451127
		479.46	0.00447762
		479.49	0.00444438
		479.52	0.00441156
		479.55	0.00437916
		479.58	0.00434715
		479.61	0.00431555
		479.64	0.00428435
		479.67	0.00425354
		479.7	0.00422312
		479.73	0.00419307
		479.76	0.0041634
		479.79	0.0041341
		479.82	0.00410515
		479.85	0.00407658
		479.88	0.00404835
		479.91	0.00402047
		479.94	0.00399294
		479.97	0.00396574
		480	0.00393888
		480.03	0.00391234
		480.06	0.00388613
		480.09	0.00386022
		480.12	0.00383463
		480.15	0.00380935
		480.18	0.00378437
		480.21	0.00375969
		480.24	0.0037353
		480.27	0.00371118
		480.3	0.00368735
		480.33	0.0036638
		480.36	0.00364051
		480.39	0.0036175
		480.42	0.00359475
		480.45	0.00357225
		480.48	0.00355
		480.51	0.003528
		480.54	0.00350624
		480.57	0.00348472
		480.6	0.00346343
		480.63	0.00344237
		480.66	0.00342153
		480.69	0.00340091
		480.72	0.0033805
		480.75	0.00336031
		480.78	0.00334032
		480.81	0.00332052
		480.84	0.00330093
		480.87	0.00328153
		480.9	0.00326231
		480.93	0.00324328
		480.96	0.00322443
		480.99	0.00320574
		481.02	0.00318724
		481.05	0.0031689
		481.08	0.00315074
		481.11	0.00313273
		481.14	0.00311487
		481.17	0.00309717
		481.2	0.00307962
		481.23	0.00306222
		481.26	0.00304496
		481.29	0.00302783
		481.32	0.00301084
		481.35	0.00299399
		481.38	0.00297726
		481.41	0.00296065
		481.44	0.00294417
		481.47	0.00292781
		481.5	0.00291155
		481.53	0.00289542
		481.56	0.00287939
		481.59	0.00286348
		481.62	0.00284766
		481.65	0.00283195
		481.68	0.00281634
		481.71	0.00280082
		481.74	0.00278539
		481.77	0.00277006
		481.8	0.00275481
		481.83	0.00273965
		481.86	0.00272457
		481.89	0.00270958
		481.92	0.00269466
		481.95	0.00267981
		481.98	0.00266504
		482.01	0.00265033
		482.04	0.00263571
		482.07	0.00262115
		482.1	0.00260666
		482.13	0.00259223
		482.16	0.00257786
		482.19	0.00256356
		482.22	0.00254931
		482.25	0.00253512
		482.28	0.00252098
		482.31	0.00250689
		482.34	0.00249286
		482.37	0.00247888
		482.4	0.00246495
		482.43	0.00245106
		482.46	0.00243721
		482.49	0.00242342
		482.52	0.00240967
		482.55	0.00239596
		482.58	0.00238229
		482.61	0.00236866
		482.64	0.00235507
		482.67	0.00234152
		482.7	0.002328
		482.73	0.00231452
		482.76	0.00230108
		482.79	0.00228766
		482.82	0.00227428
		482.85	0.00226093
		482.88	0.00224761
		482.91	0.00223432
		482.94	0.00222106
		482.97	0.00220783
		483	0.00219463
		483.03	0.00218145
		483.06	0.0021683
		483.09	0.00215518
		483.12	0.00214208
		483.15	0.00212901
		483.18	0.00211596
		483.21	0.00210294
		483.24	0.00208994
		483.27	0.00207696
		483.3	0.002064
		483.33	0.00205107
		483.36	0.00203817
		483.39	0.00202528
		483.42	0.00201241
		483.45	0.00199957
		483.48	0.00198673
		483.51	0.00197393
		483.54	0.00196115
		483.57	0.00194839
		483.6	0.00193566
		483.63	0.00192294
		483.66	0.00191025
		483.69	0.00189758
		483.72	0.00188492
		483.75	0.00187229
		483.78	0.00185968
		483.81	0.00184709
		483.84	0.00183452
		483.87	0.00182197
		483.9	0.00180944
		483.93	0.00179693
		483.96	0.00178445
		483.99	0.00177199
		484.02	0.00175955
		484.05	0.00174712
		484.08	0.00173472
		484.11	0.00172233
		484.14	0.00170998
		484.17	0.00169765
		484.2	0.00168535
		484.23	0.00167307
		484.26	0.00166081
		484.29	0.00164857
		484.32	0.00163636
		484.35	0.00162417
		484.38	0.00161201
		484.41	0.00159988
		484.44	0.00158777
		484.47	0.00157569
		484.5	0.00156364
		484.53	0.00155161
		484.56	0.00153961
		484.59	0.00152764
		484.62	0.0015157
		484.65	0.00150378
		484.68	0.00149189
		484.71	0.00148003
		484.74	0.0014682
		484.77	0.0014564
		484.8	0.00144463
		484.83	0.00143287
		484.86	0.00142117
		484.89	0.00140949
		484.92	0.00139785
		484.95	0.00138624
		484.98	0.00137467
		485.01	0.00136313
		485.04	0.00135162
		485.07	0.00134015
		485.1	0.00132871
		485.13	0.00131729
		485.16	0.00130591
		485.19	0.00129458
		485.22	0.00128329
		485.25	0.00127204
		485.28	0.00126082
		485.31	0.00124964
		485.34	0.0012385
		485.37	0.0012274
		485.4	0.00121634
		485.43	0.00120531
		485.46	0.00119432
		485.49	0.00118338
		485.52	0.00117248
		485.55	0.00116163
		485.58	0.00115081
		485.61	0.00114005
		485.64	0.00112931
		485.67	0.00111863
		485.7	0.00110799
		485.73	0.0010974
		485.76	0.00108686
		485.79	0.00107635
		485.82	0.0010659
		485.85	0.00105549
		485.88	0.00104513
		485.91	0.00103482
		485.94	0.00102455
		485.97	0.00101433
		486	0.00100416
		486.03	0.000994042
		486.06	0.000983971
		486.09	0.00097395
		486.12	0.000963979
		486.15	0.000954059
		486.18	0.000944189
		486.21	0.000934371
		486.24	0.000924605
		486.27	0.00091489
		486.3	0.000905218
		486.33	0.00089561
		486.36	0.000886054
		486.39	0.000876552
		486.42	0.000867103
		486.45	0.000857709
		486.48	0.000848369
		486.51	0.000839084
		486.54	0.000829854
		486.57	0.000820679
		486.6	0.000811549
		486.63	0.000802486
		486.66	0.000793479
		486.69	0.000784529
		486.72	0.000775635
		486.75	0.000766798
		486.78	0.000758018
		486.81	0.000749295
		486.84	0.00074063
		486.87	0.000732023
		486.9	0.000723474
		486.93	0.000714983
		486.96	0.000706551
		486.99	0.000698177
		487.02	0.000689862
		487.05	0.000681606
		487.08	0.000673399
		487.11	0.000665262
		487.14	0.000657184
		487.17	0.000649155
		487.2	0.000641197
		487.23	0.000633299
		487.26	0.000625461
		487.29	0.000617682
		487.32	0.000609964
		487.35	0.000602306
		487.38	0.000594708
		487.41	0.00058717
		487.44	0.000579693
		487.47	0.000572276
		487.5	0.00056492
		487.53	0.000557624
		487.56	0.000550389
		487.59	0.000543214
		487.62	0.0005361
		487.65	0.000529046
		487.68	0.000522054
		487.71	0.000515121
		487.74	0.00050825
		487.77	0.000501438
		487.8	0.000494688
		487.83	0.000487997
		487.86	0.000481368
		487.89	0.000474798
		487.92	0.000468289
		487.95	0.00046184
		487.98	0.000455451
		488.01	0.000449123
		488.04	0.000442854
		488.07	0.000436645
		488.1	0.000430496
		488.13	0.000424407
		488.16	0.000418377
		488.19	0.000412407
		488.22	0.000406495
		488.25	0.000400643
		488.28	0.00039485
		488.31	0.000389116
		488.34	0.00038344
		488.37	0.000377823
		488.4	0.000372264
		488.43	0.000366763
		488.46	0.00036132
		488.49	0.000355935
		488.52	0.000350607
		488.55	0.000345336
		488.58	0.000340123
		488.61	0.000334966
		488.64	0.000329866
		488.67	0.000324823
		488.7	0.000319836
		488.73	0.000314904
		488.76	0.000310028
		488.79	0.000305208
		488.82	0.000300443
		488.85	0.000295732
		488.88	0.000291077
		488.91	0.000286475
		488.94	0.000281928
		488.97	0.000277434
		489	0.000272994
		489.03	0.000268597
		489.06	0.000264263
		489.09	0.000259982
		489.12	0.000255754
		489.15	0.000251577
		489.18	0.000247451
		489.21	0.000243377
		489.24	0.000239355
		489.27	0.000235382
		489.3	0.00023146
		489.33	0.000227588
		489.36	0.000223766
		489.39	0.000219993
		489.42	0.000216269
		489.45	0.000212593
		489.48	0.000208966
		489.51	0.000205387
		489.54	0.000201855
		489.57	0.000198371
		489.6	0.000194933
		489.63	0.000191542
		489.66	0.000188197
		489.69	0.000184898
		489.72	0.000181644
		489.75	0.000178425
		489.78	0.000175261
		489.81	0.000172142
		489.84	0.000169066
		489.87	0.000166034
		489.9	0.000163045
		489.93	0.000160099
		489.96	0.000157195
		489.99	0.000154333
		490.02	0.000151513
		490.05	0.000148734
		490.08	0.000145996
		490.11	0.000143298
		490.14	0.00014064
		490.17	0.000138022
		490.2	0.000135444
		490.23	0.000132904
		490.26	0.000130403
		490.29	0.00012794
		490.32	0.000125514
		490.35	0.000123126
		490.38	0.000120775
		490.41	0.000118461
		490.44	0.000116183
		490.47	0.00011394
		490.5	0.000111734
		490.53	0.000109562
		490.56	0.000107424
		490.59	0.000105321
		490.62	0.000103252
		490.65	0.000101207
		490.68	9.92045e-05
		490.71	9.72352e-05
		490.74	9.52982e-05
		490.77	9.33932e-05
		490.8	9.15198e-05
		490.83	8.96776e-05
		490.86	8.78662e-05
		490.89	8.60854e-05
		490.92	8.43346e-05
		490.95	8.26136e-05
		490.98	8.09219e-05
		491.01	7.92592e-05
		491.04	7.76251e-05
		491.07	7.60194e-05
		491.1	7.44415e-05
		491.13	7.28911e-05
		491.16	7.1368e-05
		491.19	6.98717e-05
		491.22	6.84018e-05
		491.25	6.69581e-05
		491.28	6.55402e-05
		491.31	6.41477e-05
		491.34	6.27803e-05
		491.37	6.14376e-05
		491.4	6.01193e-05
		491.43	5.88251e-05
		491.46	5.75546e-05
		491.49	5.63074e-05
		491.52	5.50834e-05
		491.55	5.3882e-05
		491.58	5.27031e-05
		491.61	5.15463e-05
		491.64	5.04112e-05
		491.67	4.92975e-05
		491.7	4.8205e-05
		491.73	4.71332e-05
		491.76	4.6082e-05
		491.79	4.5051e-05
		491.82	4.40398e-05
		491.85	4.30482e-05
		491.88	4.20759e-05
		491.91	4.11225e-05
		491.94	4.01879e-05
		491.97	3.92716e-05
		492	3.83735e-05
		492.03	3.74932e-05
		492.06	3.66304e-05
		492.09	3.57848e-05
		492.12	3.49562e-05
		492.15	3.41444e-05
		492.18	3.33489e-05
		492.21	3.25696e-05
		492.24	3.18062e-05
		492.27	3.10585e-05
		492.3	3.03261e-05
		492.33	2.96088e-05
		492.36	2.89064e-05
		492.39	2.82185e-05
		492.42	2.75451e-05
		492.45	2.68857e-05
		492.48	2.62402e-05
		492.51	2.56083e-05
		492.54	2.49898e-05
		492.57	2.43845e-05
		492.6	2.37921e-05
		492.63	2.32124e-05
		492.66	2.26451e-05
		492.69	2.20901e-05
		492.72	2.15471e-05
		492.75	2.10159e-05
		492.78	2.04963e-05
		492.81	1.99881e-05
		492.84	1.9491e-05
		492.87	1.9005e-05
		492.9	1.85296e-05
		492.93	1.80649e-05
		492.96	1.76105e-05
		492.99	1.71662e-05
		493.02	1.6732e-05
		493.05	1.63075e-05
		493.08	1.58926e-05
		493.11	1.54872e-05
		493.14	1.50909e-05
		493.17	1.47037e-05
		493.2	1.43254e-05
		493.23	1.39558e-05
		493.26	1.35948e-05
		493.29	1.32421e-05
		493.32	1.28976e-05
		493.35	1.25611e-05
		493.38	1.22325e-05
		493.41	1.19116e-05
		493.44	1.15983e-05
		493.47	1.12924e-05
		493.5	1.09938e-05
		493.53	1.07022e-05
		493.56	1.04176e-05
		493.59	1.01398e-05
		493.62	9.86875e-06
		493.65	9.60419e-06
		493.68	9.34603e-06
		493.71	9.09413e-06
		493.74	8.84837e-06
		493.77	8.60862e-06
		493.8	8.37473e-06
		493.83	8.1466e-06
		493.86	7.9241e-06
		493.89	7.7071e-06
		493.92	7.49548e-06
		493.95	7.28914e-06
		493.98	7.08795e-06
		494.01	6.8918e-06
		494.04	6.70058e-06
		494.07	6.51418e-06
		494.1	6.3325e-06
		494.13	6.15543e-06
		494.16	5.98286e-06
		494.19	5.8147e-06
		494.22	5.65085e-06
		494.25	5.4912e-06
		494.28	5.33567e-06
		494.31	5.18415e-06
		494.34	5.03657e-06
		494.37	4.89282e-06
		494.4	4.75282e-06
		494.43	4.61648e-06
		494.46	4.48372e-06
		494.49	4.35446e-06
		494.52	4.2286e-06
		494.55	4.10608e-06
		494.58	3.98681e-06
		494.61	3.87071e-06
		494.64	3.74723e-06
		494.67	3.63758e-06
		494.7	3.5206e-06
		494.73	3.41712e-06
		494.76	3.31644e-06
		494.79	3.21848e-06
		494.82	3.11294e-06
		494.85	3.02069e-06
		494.88	2.93096e-06
		494.91	2.84367e-06
		494.94	2.75877e-06
		494.97	2.67621e-06
[truncated: 1 more rows]

## Sheet: PlotDat9
Source sheet	data	0.556	0.07164	0.53	0.0692789	0.527276	0.0689787	0.564689	0.0722805	0.564533	0.0731401	0.576686	0.0743989	0.575234	0.0736235	0.573279	0.0733875	0.576546	0.0742099	0.581858	0.0741293	0.57677	0.0742105	0.572478	0.0738537	0.581957	0.0742545	0.575112	0.0743862	0.578222	0.0743297	0.572736	0.0744673	0.581179	0.0743784	0.583046	0.0746687	0.581901	0.0746532	0.583613	0.0745251	0.585467	0.0746669	0.583389	0.0746007	0.582558	0.0745432	0.591791	0.0750644
Plot name	Concordia6	0.5567	0.07213	0.53	0.0692789	0.534815	0.0698082	0.564493	0.0723602	0.564351	0.0731957	0.576353	0.0744568	0.575027	0.0737027	0.57307	0.0734741	0.57633	0.074248	0.581627	0.0741927	0.576524	0.0742932	0.572296	0.0738962	0.581747	0.0743248	0.57491	0.0744329	0.578032	0.0743795	0.572505	0.0745534	0.580967	0.0744715	0.582828	0.0747205	0.581688	0.0747116	0.583388	0.0745948	0.585269	0.0747316	0.583193	0.0746419	0.582327	0.0746357	0.591564	0.0751329
Plot Type	1	0.562	0.0725	0.533344	0.0696466	0.542391	0.0706383	0.563925	0.0724085	0.563836	0.0732048	0.575391	0.0744293	0.574438	0.0737325	0.572469	0.0735239	0.575706	0.0742338	0.580962	0.0742071	0.575817	0.0743237	0.571769	0.0739043	0.581152	0.0743446	0.574332	0.0744279	0.577487	0.0743847	0.571845	0.0745886	0.580364	0.0745217	0.582203	0.0747208	0.581078	0.0747197	0.582739	0.0746202	0.584705	0.0747474	0.582625	0.0746412	0.581661	0.0746864	0.59092	0.0751431
1st free col	201	0.5663	0.07257	0.536695	0.0700145	0.550005	0.071469	0.56301	0.0724232	0.563008	0.0731668	0.573845	0.0743174	0.573494	0.0737114	0.571502	0.0735346	0.574701	0.0741678	0.579893	0.0741718	0.574682	0.0743008	0.57092	0.0738777	0.580195	0.0743131	0.573403	0.0743714	0.576609	0.0743452	0.570786	0.0745715	0.579395	0.0745269	0.581197	0.0746694	0.580098	0.0746771	0.581696	0.0746001	0.5838	0.0747134	0.581712	0.0745984	0.580591	0.0746931	0.589886	0.0750947
Sigma Level	2	0.5641	0.07263	0.540054	0.0703825	0.557657	0.0723004	0.56179	0.0724036	0.561905	0.0730836	0.571781	0.0741261	0.572235	0.0736405	0.570211	0.0735058	0.57336	0.074053	0.578465	0.0740883	0.573167	0.0742253	0.569786	0.0738175	0.57892	0.0742316	0.572163	0.0742659	0.575439	0.0742626	0.569373	0.0745027	0.578103	0.0744867	0.579855	0.0745687	0.578789	0.0745857	0.580302	0.0745355	0.582594	0.0746312	0.580491	0.0745154	0.579163	0.0746556	0.588507	0.0749896
Absolute Errs	TRUE	0.567	0.07305	0.54342	0.0707507	0.565346	0.0731324	0.560316	0.0723507	0.560575	0.0729587	0.56929	0.0738637	0.570717	0.0735228	0.568654	0.0734387	0.571741	0.0738943	0.576741	0.0739603	0.571339	0.0741007	0.568416	0.0737264	0.577381	0.0741037	0.570667	0.074116	0.574027	0.0741405	0.567669	0.0743853	0.576544	0.0744029	0.578235	0.0744231	0.57721	0.0744495	0.578621	0.074429	0.581138	0.0745043	0.579018	0.074396	0.57744	0.0745754	0.586844	0.0748326
Symbol Type	1	0.5717	0.07307	0.546793	0.071119	0.573073	0.0739651	0.558654	0.0722667	0.559075	0.0727976	0.56648	0.0735417	0.569006	0.0733634	0.566897	0.0733362	0.569915	0.0736988	0.574798	0.0737934	0.569278	0.0739324	0.566871	0.0736084	0.575647	0.0739351	0.568981	0.0739283	0.572434	0.0739843	0.565747	0.0742243	0.574787	0.0742793	0.576409	0.0742388	0.57543	0.0742744	0.576724	0.0742855	0.579498	0.0743384	0.577355	0.0742453	0.575496	0.0744561	0.584969	0.0746304
Inverse Plot	FALSE	0.566	0.0731	0.550173	0.0714873	0.580838	0.0747984	0.556875	0.0721554	0.557471	0.0726073	0.563474	0.0731742	0.567176	0.0731694	0.565019	0.0732029	0.567961	0.0734748	0.572719	0.0735949	0.567073	0.0737276	0.565218	0.0734686	0.573793	0.0737329	0.567177	0.0737109	0.57073	0.0738009	0.563693	0.074027	0.572907	0.0741211	0.574455	0.074024	0.573526	0.0740681	0.574695	0.0741111	0.577744	0.0741406	0.575577	0.0740698	0.573417	0.0743028	0.582964	0.074392
Color Plot	TRUE	0.5644	0.07311	0.553561	0.0718559	0.588642	0.0756324	0.555059	0.0720215	0.555833	0.0723961	0.560403	0.0727772	0.565308	0.0729491	0.5631	0.0730446	0.565965	0.0732324	0.570595	0.0733735	0.564821	0.0734955	0.56353	0.0733131	0.5719	0.0735062	0.565335	0.0734734	0.568991	0.0735981	0.561595	0.0738018	0.570988	0.0739354	0.572459	0.0737881	0.571581	0.0738395	0.572623	0.0739135	0.575953	0.0739197	0.573761	0.0738774	0.571293	0.0741224	0.580917	0.0741276
3D plot	FALSE	0.5729	0.07317	0.556957	0.0722245	0.596484	0.076467	0.553283	0.0718709	0.554234	0.0721733	0.557403	0.0723681	0.563484	0.0727123	0.561225	0.0728681	0.564015	0.0729819	0.56852	0.0731388	0.562621	0.073246	0.561879	0.0731487	0.57005	0.0732648	0.563535	0.0732261	0.56729	0.073385	0.559545	0.0735585	0.569114	0.0737302	0.570509	0.0735413	0.569681	0.0735988	0.570597	0.0737014	0.574203	0.0736852	0.571985	0.0736763	0.569218	0.0739226	0.578918	0.073849
Linear	FALSE	0.5663	0.07325	0.56036	0.0725933	0.604365	0.0773023	0.551626	0.0717102	0.552742	0.0719486	0.554603	0.0719648	0.561783	0.0724693	0.559475	0.0726812	0.562195	0.0727344	0.566583	0.0729011	0.560569	0.0729902	0.560339	0.0729827	0.568325	0.0730193	0.561856	0.0729798	0.565704	0.0731708	0.557633	0.073308	0.567365	0.0735145	0.568689	0.0732944	0.567909	0.0733563	0.568707	0.0734839	0.572571	0.0734474	0.570328	0.0734753	0.567282	0.0737122	0.577053	0.0735682
Data Range	G2:K97	0.5699	0.07336	0.56377	0.0729622	0.612285	0.0781382	0.550161	0.0715465	0.551423	0.0717319	0.552127	0.0715849	0.560279	0.0722307	0.557928	0.0724921	0.560585	0.0725007	0.564871	0.0726707	0.558754	0.0727391	0.558976	0.0728222	0.5668	0.0727803	0.560371	0.0727454	0.564302	0.0729648	0.555943	0.073061	0.565819	0.0732977	0.56708	0.0730583	0.566342	0.0731228	0.567036	0.0732707	0.571129	0.0732168	0.568862	0.0732833	0.565569	0.0735004	0.575404	0.0732975
Filled Symbols	FALSE	0.5627	0.07339	0.567188	0.0733312	0.620244	0.0789747	0.548951	0.0713868	0.550335	0.0715325	0.550082	0.0712449	0.559038	0.0720069	0.55665	0.072309	0.559255	0.0722911	0.563456	0.0724579	0.557256	0.0725039	0.55785	0.0726743	0.565541	0.0725584	0.559145	0.072533	0.563144	0.0727761	0.554548	0.0728284	0.564543	0.0730894	0.565751	0.0728432	0.565048	0.0729084	0.565656	0.0730709	0.569939	0.0730033	0.567652	0.0731087	0.564155	0.0732964	0.574044	0.0730488
ConcAge	FALSE	0.572	0.07349	0.570613	0.0737004	0.628242	0.0798119	0.548048	0.0712383	0.549525	0.0713592	0.548558	0.0709598	0.558115	0.0718077	0.555698	0.0721399	0.558264	0.0721145	0.562402	0.0722717	0.55614	0.0722947	0.55701	0.0725454	0.564604	0.0723632	0.558232	0.0723519	0.562281	0.072613	0.553509	0.0726203	0.563593	0.0728985	0.564761	0.0726586	0.564084	0.0727224	0.564627	0.0728934	0.569052	0.0728163	0.566749	0.072959	0.563102	0.0731093	0.573031	0.072833
ConcSwap	FALSE	0.5735	0.07354	0.574046	0.0740697	IsoLine	IsoLine	0.547494	0.0711072	0.549029	0.0712197	0.547622	0.0707421	0.557549	0.0716418	0.555113	0.0719923	0.557655	0.0719789	0.561755	0.0721205	0.555454	0.0721207	0.556494	0.0724412	0.56403	0.0722032	0.557672	0.0722101	0.561751	0.0724824	0.552872	0.0724459	0.563011	0.0727335	0.564153	0.0725125	0.563492	0.072573	0.563995	0.0727459	0.568509	0.072664	0.566194	0.0728408	0.562454	0.072947	0.572411	0.0726594
1st Symbol-row	1	0.5726	0.07356	0.577486	0.0744391			0.547311	0.0709995	0.548867	0.0711199	0.547314	0.0706011	0.557366	0.0715165	0.554921	0.0718725	0.557454	0.0718901	0.561542	0.0720107	0.55523	0.0719895	0.556322	0.0723663	0.563843	0.0720855	0.557488	0.0721138	0.561578	0.0723903	0.552664	0.0723127	0.562821	0.0726016	0.563954	0.0724113	0.563299	0.0724668	0.563787	0.0726349	0.568333	0.0725531	0.566011	0.0727593	0.562242	0.0728168	0.572209	0.0725356
		0.5737	0.07358	0.580933	0.0748086			0.547507	0.0709198	0.549049	0.0710643	0.547647	0.0705432	0.557573	0.0714373	0.55513	0.0717859	0.55767	0.071852	0.561773	0.0719473	0.555476	0.0719068	0.556504	0.0723238	0.564053	0.0720152	0.55769	0.0720671	0.561768	0.0723405	0.552895	0.0722266	0.563033	0.0725085	0.564172	0.0723595	0.563512	0.0724084	0.564012	0.0725652	0.568531	0.0724884	0.566207	0.0727181	0.562473	0.0727243	0.572436	0.0724671
		0.5769	0.07361	0.584389	0.0751783			0.548075	0.0708715	0.549564	0.0710552	0.548609	0.0705707	0.558162	0.0714075	0.555731	0.0717361	0.558294	0.0718662	0.562438	0.0719329	0.556183	0.0718763	0.557031	0.0723157	0.564648	0.0719954	0.558268	0.0720721	0.562313	0.0723353	0.553555	0.0721914	0.563636	0.0724583	0.564797	0.0723592	0.564122	0.0724003	0.564661	0.0725398	0.569095	0.0724726	0.566775	0.0727188	0.563139	0.0726736	0.57308	0.0724569
		0.5747	0.07368	0.587851	0.0755481			0.54899	0.0708568	0.550392	0.0710932	0.550155	0.0706826	0.559106	0.0714286	0.556698	0.0717254	0.559299	0.0719322	0.563507	0.0719682	0.557318	0.0718992	0.55788	0.0723423	0.565605	0.0720269	0.559197	0.0721286	0.563191	0.0723748	0.554614	0.0722085	0.564605	0.0724531	0.565803	0.0724106	0.565102	0.0724429	0.565704	0.0725599	0.57	0.0725066	0.567688	0.0727616	0.564209	0.0726669	0.574114	0.0725053
		0.5724	0.07368	0.591322	0.075918			0.55021	0.0708764	0.551495	0.0711764	0.552219	0.0708739	0.560365	0.0714995	0.557989	0.0717542	0.56064	0.072047	0.564935	0.0720517	0.558833	0.0719747	0.559014	0.0724025	0.56688	0.0721084	0.560437	0.0722341	0.564361	0.0724574	0.556027	0.0722773	0.565897	0.0724933	0.567145	0.0725113	0.566411	0.0725343	0.567098	0.0726245	0.571206	0.0725888	0.568909	0.0728446	0.565637	0.0727044	0.575493	0.0726104
		0.582	0.0738	0.5948	0.076288			0.551684	0.0709293	0.552825	0.0713013	0.55471	0.0711363	0.561883	0.0716172	0.559546	0.0718213	0.562259	0.0722057	0.566659	0.0721797	0.560661	0.0720993	0.560384	0.0724936	0.568419	0.0722363	0.561933	0.072384	0.565773	0.0725795	0.557731	0.0723947	0.567456	0.0725771	0.568765	0.0726569	0.56799	0.0726705	0.568779	0.072731	0.572662	0.0727157	0.570382	0.072964	0.56736	0.0727846	0.577156	0.0727674
		0.581	0.0738	0.598285	0.0766582			0.553346	0.0710133	0.554325	0.0714624	0.55752	0.0714583	0.563594	0.0717766	0.561303	0.0719238	0.564085	0.0724012	0.568602	0.0723466	0.562722	0.0722676	0.561929	0.0726116	0.570153	0.0724049	0.563619	0.0725717	0.567366	0.0727357	0.559653	0.0725557	0.569213	0.0727007	0.570591	0.0728412	0.56977	0.0728456	0.570676	0.0728745	0.574302	0.0728816	0.572045	0.0731147	0.569304	0.0729039	0.579031	0.0729696
		0.5711	0.07383	0.601778	0.0770285			0.555125	0.0711246	0.555929	0.0716527	0.560526	0.0718258	0.565424	0.0719706	0.563181	0.0720571	0.566039	0.0726252	0.570681	0.0725451	0.564927	0.0724724	0.563582	0.0727514	0.572007	0.0726071	0.565423	0.0727891	0.56907	0.0729191	0.561707	0.072753	0.571093	0.0728589	0.572545	0.073056	0.571674	0.0730519	0.572705	0.0730489	0.576056	0.0730794	0.573823	0.0732902	0.571383	0.0730572	0.581036	0.073208
		0.5733	0.07387	0.605279	0.0773989			0.556941	0.0712585	0.557567	0.0718639	0.563597	0.0722228	0.567292	0.0721909	0.5651	0.0722154	0.568035	0.0728676	0.572805	0.0727665	0.567179	0.0727045	0.56527	0.0729069	0.5739	0.0728338	0.567265	0.0730266	0.570809	0.0731219	0.563805	0.0729782	0.573012	0.0730446	0.574541	0.0732919	0.573619	0.0732805	0.574777	0.0732465	0.577847	0.0733003	0.575639	0.0734826	0.573507	0.0732376	0.583083	0.0734724
		0.564	0.0739	0.608788	0.0777695			0.558717	0.0714091	0.559166	0.0720867	0.566597	0.0726319	0.569116	0.0724277	0.566975	0.0723919	0.569985	0.0731181	0.57488	0.0730012	0.569379	0.072954	0.566921	0.0730713	0.57575	0.0730752	0.569065	0.0732739	0.57251	0.073335	0.565855	0.0732215	0.574886	0.0732498	0.576491	0.0735387	0.575519	0.0735212	0.576803	0.0734586	0.579597	0.0735348	0.577415	0.0736837	0.575582	0.0734374	0.585082	0.073751
		0.5674	0.07391	0.612304	0.0781402			0.560374	0.0715698	0.560658	0.0723114	0.569397	0.0730352	0.570817	0.0726707	0.568725	0.0725788	0.571805	0.0733656	0.576817	0.0732389	0.571431	0.0732098	0.568461	0.0732373	0.577475	0.0733207	0.570744	0.0735202	0.574096	0.0735492	0.567767	0.073472	0.576635	0.0734655	0.578311	0.0737856	0.577291	0.0737637	0.578693	0.0736761	0.581229	0.0737726	0.579072	0.0738847	0.577518	0.0736478	0.586947	0.0740318
		0.5751	0.074	0.615828	0.078511			0.561839	0.0717335	0.561977	0.0725281	0.571873	0.0734151	0.572321	0.0729093	0.570272	0.0727679	0.573415	0.0735993	0.578529	0.0734693	0.573246	0.0734609	0.569824	0.0733978	0.579	0.0735597	0.572229	0.0737546	0.575498	0.0737552	0.569457	0.073719	0.578181	0.0736823	0.57992	0.0740217	0.578858	0.0739972	0.580364	0.0738893	0.582671	0.0740032	0.580538	0.0740767	0.579231	0.0738596	0.588596	0.0743025
		0.5726	0.074	0.619359	0.0788819			0.563049	0.0718932	0.563065	0.0727275	0.573918	0.0737551	0.573562	0.0731331	0.57155	0.072951	0.574745	0.0738089	0.579944	0.0736821	0.574744	0.0736961	0.57095	0.0735457	0.580259	0.0737816	0.573455	0.073967	0.576656	0.0739439	0.570852	0.0739516	0.579457	0.0738906	0.581249	0.0742368	0.580152	0.0742116	0.581744	0.0740891	0.583861	0.0742167	0.581748	0.0742513	0.580645	0.0740636	0.589956	0.0745512
		0.581	0.07401	0.622898	0.079253			0.563952	0.0720417	0.563875	0.0729008	0.575442	0.0740402	0.574485	0.0733323	0.572502	0.0731201	0.575736	0.0739855	0.580998	0.0738683	0.57586	0.0739053	0.57179	0.0736746	0.581196	0.0739768	0.574368	0.0741481	0.577519	0.074107	0.571891	0.0741597	0.580407	0.0740815	0.582239	0.0744214	0.581116	0.0743976	0.582773	0.0742666	0.584748	0.0744037	0.582651	0.074401	0.581698	0.0742507	0.590969	0.074767
		0.5854	0.07406	0.626445	0.0796242			0.564506	0.0721728	0.564371	0.0730403	0.576378	0.0742579	0.575051	0.0734982	0.573087	0.0732677	0.576345	0.0741211	0.581645	0.0740195	0.576546	0.0740793	0.572306	0.0737788	0.58177	0.0741368	0.574928	0.0742899	0.578049	0.0742376	0.572528	0.0743341	0.580989	0.0742465	0.582847	0.0745675	0.581708	0.074547	0.583405	0.0744141	0.585291	0.074556	0.583206	0.0745192	0.582346	0.074413	0.591589	0.0749406
		0.5767	0.07405	0.63	0.0799955			0.564689	0.0722805	0.564533	0.0731401	0.576686	0.0743989	0.575234	0.0736235	0.573279	0.0733875	0.576546	0.0742099	0.581858	0.0741293	0.57677	0.0742105	0.572478	0.0738537	0.581957	0.0742545	0.575112	0.0743862	0.578222	0.0743297	0.572736	0.0744673	0.581179	0.0743784	0.583046	0.0746687	0.581901	0.0746532	0.583613	0.0745251	0.585467	0.0746669	0.583389	0.0746007	0.582558	0.0745432	0.591791	0.0750644
		0.5788	0.07407	0.63	0.0799955
		0.5749	0.07406	IsoLine	IsoLine
		0.5748	0.07408
		0.573	0.0742
		0.5866	0.07424
		0.5785	0.07437
		0.577	0.0744
		0.5704	0.07437
		0.5773	0.07441
		0.5769	0.07445
		0.5829	0.07457
		0.583	0.07459
		0.5733	0.07458
		0.579	0.07461
		0.5772	0.07443
		0.5847	0.07466
		0.5814	0.0747
		0.5745	0.0747
		0.5791	0.0747
		0.5932	0.07472
		0.5797	0.07471
		0.5864	0.07479
		0.5791	0.0748
		0.581	0.0748
		0.5888	0.07491
		0.583	0.0749
		0.5769	0.07492
		0.5771	0.07493
		0.5837	0.07495
		0.589	0.07497
		0.5829	0.075
		0.5835	0.0751
		0.5923	0.07512
		0.587	0.0751
		0.5867	0.0751
		0.5831	0.0751
		0.584	0.0751
		0.5812	0.07516
		0.5832	0.0752
		0.5857	0.07527
		0.5895	0.0753
		0.587	0.0754
		0.584	0.0754
		0.5918	0.07541
		0.5844	0.0754
		0.5913	0.0755
		0.586	0.0755
		0.5939	0.0756
		0.5878	0.0756
		0.5837	0.07559
		0.589	0.07564
		0.5839	0.0757
		0.5903	0.07566
		0.6054	0.0759
		0.5955	0.07592
		0.5878	0.07602
		0.601	0.0761
		0.5877	0.07616
		0.6037	0.0762
		0.6005	0.07629
		0.5977	0.0763
		0.594	0.0762
		0.5971	0.07653
		0.5999	0.0772
		0.606	0.0778
		IsoLine	IsoLine
[truncated: 150 more columns]

## Sheet: PlotDat2
Source sheet	data	0.3	463.124	1	446	3.9
Plot name	Average1	96.7	463.124	2	448.9	5.3
Plot Type	15			3	450.9	9.8
1st free col	8			4	451.6	5.7
Sigma Level	2			5	452	4.5
Absolute Errs	TRUE			6	454.5	5.9
Symbol Type	1			7	454.6	5.6
Inverse Plot	FALSE			8	454.7	6
Color Plot	TRUE			9	454.9	3.9
3D plot	FALSE			10	455.2	5.7
Linear	FALSE			11	455.7	5.9
Data Range	AB2:AC97			12	456.3	5.1
Filled Symbols	FALSE			13	456.5	5.9
ConcAge	FALSE			14	457.2	5.1
ConcSwap	FALSE			15	457.4	5.8
1st Symbol-row	1			16	457.6	5.7
				17	457.7	5.1
				18	457.9	5.6
				19	458.3	4.8
				20	458.3	5
				21	458.9	6.5
				22	459	8.7
				23	459.2	4.8
				24	459.4	4.8
				25	459.6	5.8
				26	459.7	5.3
				27	460	6.2
				28	460	6.1
				29	460.2	5.6
				30	460.5	5.1
				31	460.5	4.6
				32	460.6	5.9
				33	460.6	4.9
				34	460.7	5
				35	461.4	7.3
				36	461.7	5.2
				37	462.4	4.4
				38	462.4	6.4
				39	462.4	5.8
				40	462.7	4.6
				41	462.9	5.2
				42	463.6	5.4
				43	463.7	4.9
				44	463.7	5.6
				45	463.8	5.5
				46	463.8	5.6
				47	464.1	5.9
				48	464.2	6.1
				49	464.3	6.3
				50	464.4	6.4
				51	464.5	5.2
				52	464.5	6
				53	464.9	4.7
				54	465	6.3
				55	465.2	7.6
				56	465.7	4.6
				57	465.7	8.1
				58	465.7	4.7
				59	465.8	5.2
				60	465.9	5
				61	466	5.9
				62	466.2	6.5
				63	466.8	6.4
				64	466.9	5.4
				65	466.9	7.7
				66	466.9	6
				67	466.9	7.8
				68	467	7
				69	467.1	5.7
				70	467.4	7.2
				71	467.8	5.4
				72	468	7.6
				73	468.3	7.6
				74	468.4	6.8
				75	468.6	5.5
				76	468.6	6.4
				77	469.3	6.4
				78	469.3	6.1
				79	469.7	6.5
				80	469.7	6
				81	469.7	5.9
				82	470	5.9
				83	470.1	6.2
				84	470.2	5
				85	471.7	7.5
				86	471.7	4.8
				87	472.3	5.4
				88	472.7	9.2
				89	473.1	4.9
				90	473.5	7.1
				91	473.9	5.4
				92	474.2	6.1
				93	474.8	8.3
				94	475.4	4.8
				95	479.3	6.4
				96	482.9	6.9
				IsoLine	IsoLine	IsoLine	IsoLine

## Sheet: PlotDat8
Source sheet	data	13.9587	0.05573	14.5168	0.0555148	14.1758	0.0557647	13.8499	0.0560162	13.5382	0.0562692	13.2398	0.0565238	12.9538	0.05678	12.6795	0.0570379	12.4162	0.0572973	12.2	0.057424	12.2	0.0572977	12.2	0.0575503	14.854	0.0551918	12.2	0.0573721	14.2151	0.0556245	14.1188	0.0559816	14.0477	0.0565702	14.0332	0.0561148	14.0214	0.0561237	13.9411	0.055722	13.9372	0.056301	13.9315	0.0557934	13.9293	0.0560334	13.9181	0.0562525
Plot name	Concordia3	13.8639	0.05603	14.516	0.0555436	14.175	0.0557938	13.8492	0.0560456	13.5375	0.0562989	13.2391	0.0565538	12.9531	0.0568103	12.6788	0.0570684	12.4155	0.0573281	12.2	0.057424	12.2	0.0572977	12.2	0.0575503	14.4972	0.0554397	14.6	0.0553641	14.2126	0.0558256	14.1163	0.0561779	14.0452	0.0567608	14.0307	0.0563137	14.0189	0.0563254	13.9386	0.0559137	13.9347	0.0565003	13.929	0.0559957	13.9269	0.0562291	13.9157	0.0564438
Plot Type	1	13.7931	0.05628	14.5137	0.0555641	14.1728	0.0558145	13.847	0.0560664	13.5353	0.05632	13.237	0.0565751	12.951	0.0568318	12.6768	0.0570902	12.4135	0.0573501	12.27	0.0573513	12.27	0.0572254	12.27	0.0574773	14.1566	0.0556892			14.2052	0.0560248	14.1089	0.0563714	14.0378	0.056942	14.0234	0.0565091	14.0116	0.0565251	13.9313	0.056108	13.9274	0.0566981	13.9217	0.0561987	13.9196	0.0564259	13.9084	0.0566273
1st free col	223	13.7798	0.05613	14.5101	0.0555744	14.1692	0.055825	13.8435	0.0560771	13.5319	0.0563308	13.2336	0.0565861	12.9477	0.0568429	12.6736	0.0571014	12.4103	0.0573616	12.3407	0.0572788	12.3407	0.0571531	12.3407	0.0574044	13.8312	0.0559403			14.1929	0.0562183	14.0967	0.0565581	14.0257	0.0571103	14.0113	0.0566971	13.9995	0.0567191	13.9193	0.0563013	13.9154	0.0568904	13.9097	0.0563983	13.9076	0.0566201	13.8964	0.0567997
Sigma Level	2	13.7684	0.05623	14.5054	0.0555739	14.1646	0.0558245	13.839	0.0560767	13.5275	0.0563304	13.2293	0.0565858	12.9435	0.0568427	12.6694	0.0571013	12.4063	0.0573615	12.4123	0.0572064	12.4123	0.057081	12.4123	0.0573317	13.5199	0.0561929			14.1761	0.0564023	14.08	0.0567346	14.009	0.0572625	13.9947	0.0568741	13.983	0.0569036	13.9028	0.0564896	13.8989	0.0570737	13.8933	0.0565908	13.8911	0.0568079	13.8799	0.0569575
Absolute Errs	TRUE	13.6893	0.05605	14.5	0.0555624	14.1594	0.055813	13.8338	0.0560652	13.5225	0.0563189	13.2244	0.0565742	12.9387	0.0568312	12.6647	0.0570897	12.4017	0.0573499	12.4846	0.0571341	12.4846	0.057009	12.4846	0.0572591	13.2219	0.0564472			14.1551	0.0565731	14.0591	0.0568974	13.9881	0.0573955	13.9739	0.0570366	13.9622	0.057075	13.8822	0.0566694	13.8783	0.0572441	13.8726	0.0567724	13.8705	0.0569856	13.8593	0.0570976
Symbol Type	1	13.6855	0.05642	14.4944	0.0555411	14.1539	0.0557916	13.8285	0.0560436	13.5173	0.0562972	13.2193	0.0565524	12.9337	0.0568092	12.6598	0.0570677	12.3969	0.0573277	12.5578	0.0570619	12.5578	0.0569372	12.5578	0.0571866	12.9362	0.056703			14.1303	0.0567276	14.0344	0.0570433	13.9634	0.0575069	13.9493	0.0571814	13.9377	0.05723	13.8577	0.0568371	13.8539	0.0573986	13.8482	0.0569395	13.8462	0.0571497	13.835	0.0572173
Inverse Plot	TRUE	13.6799	0.05603	14.4891	0.0555115	14.1487	0.0557618	13.8234	0.0560136	13.5123	0.0562671	13.2144	0.0565221	12.9289	0.0567787	12.6551	0.0570369	12.3923	0.0572968	12.6317	0.0569898	12.6317	0.0568655	12.6317	0.0571142	12.6623	0.0569604			14.1021	0.0568627	14.0064	0.0571695	13.9355	0.0575943	13.9215	0.0573058	13.9099	0.0573654	13.8301	0.0569895	13.8262	0.057534	13.8206	0.0570889	13.8186	0.0572971	13.8073	0.0573142
Color Plot	TRUE	13.678	0.05629	14.4844	0.0554761	14.1441	0.0557262	13.8189	0.0559777	13.5079	0.0562309	13.2101	0.0564857	12.9247	0.056742	12.651	0.057	12.3882	0.0572596	12.7066	0.0569179	12.7066	0.0567939	12.7066	0.057042	12.3993	0.0572194			14.0711	0.0569757	13.9756	0.0572735	13.9047	0.0576562	13.8909	0.0574073	13.8793	0.0574788	13.7996	0.0571236	13.7958	0.0576477	13.7902	0.0572178	13.7882	0.0574249	13.777	0.0573866
3D plot	FALSE	13.6668	0.05605	14.4807	0.0554378	14.1405	0.0556875	13.8154	0.0559388	13.5045	0.0561917	13.2067	0.0564461	12.9214	0.0567022	12.6478	0.0569598	12.3851	0.0572191	12.7823	0.0568461	12.7823	0.0567224	12.7823	0.0569699	IsoLine	IsoLine			14.0379	0.0570644	13.9426	0.0573533	13.8718	0.0576913	13.8581	0.0574839	13.8466	0.0575679	13.7671	0.0572368	13.7633	0.0577375	13.7576	0.0573235	13.7557	0.0575307	13.7445	0.057433
Linear	FALSE	13.6519	0.05613	14.4784	0.0553996	14.1382	0.055649	13.8132	0.0559	13.5023	0.0561526	13.2046	0.0564067	12.9194	0.0566624	12.6458	0.0569197	12.3831	0.0571787	12.8588	0.0567745	12.8588	0.056651	12.8588	0.0568979					14.0032	0.0571272	13.9081	0.0574073	13.8373	0.0576989	13.8238	0.0575342	13.8123	0.0576309	13.733	0.0573269	13.7292	0.0578017	13.7236	0.057404	13.7217	0.0576122	13.7104	0.0574524
Data Range	Q2:U97	13.6314	0.05666	14.4776	0.0553647	14.1375	0.0556138	13.8124	0.0558645	13.5015	0.0561167	13.2039	0.0563705	12.9187	0.0566259	12.6451	0.0568829	12.3824	0.0571415	12.9363	0.0567029	12.9363	0.0565798	12.9363	0.0568261					13.9676	0.0571628	13.8728	0.0574345	13.802	0.0576789	13.7886	0.0575572	13.7772	0.0576667	13.698	0.0573922	13.6943	0.057839	13.6887	0.0574578	13.6868	0.0576681	13.6756	0.0574446
Filled Symbols	FALSE	13.6258	0.05573	14.4784	0.0553358	14.1382	0.0555847	13.8132	0.0558351	13.5023	0.056087	13.2046	0.0563406	12.9194	0.0565957	12.6458	0.0568524	12.3831	0.0571107	13.0147	0.0566315	13.0147	0.0565087	13.0147	0.0567543					13.9319	0.0571705	13.8372	0.0574344	13.7665	0.0576316	13.7533	0.0575523	13.742	0.0576745	13.6629	0.0574313	13.6592	0.0578487	13.6536	0.0574837	13.6518	0.0576971	13.6405	0.0574096
ConcAge	FALSE	13.6073	0.05633	14.4807	0.0553154	14.1405	0.055564	13.8154	0.0558142	13.5045	0.0560659	13.2067	0.0563192	12.9214	0.0565741	12.6478	0.0568306	12.3851	0.0570887	13.0939	0.0565602	13.0939	0.0564377	13.0939	0.0566827					13.8967	0.0571502	13.8022	0.057407	13.7315	0.0575581	13.7185	0.0575198	13.7072	0.0576542	13.6283	0.0574436	13.6246	0.0578305	13.619	0.0574814	13.6172	0.0576987	13.606	0.0573481
ConcSwap	FALSE	13.598	0.05624	14.4844	0.055305	14.1441	0.0555535	13.8189	0.0558035	13.5079	0.0560551	13.2101	0.0563083	12.9247	0.056563	12.651	0.0568193	12.3882	0.0570773	13.1741	0.056489	13.1741	0.0563668	13.1741	0.0566112					13.8626	0.0571022	13.7684	0.0573527	13.6977	0.0574597	13.6849	0.0574603	13.6736	0.0576061	13.5949	0.0574287	13.5912	0.0577849	13.5856	0.0574509	13.5839	0.0576729	13.5727	0.0572614
1st Symbol-row	1	13.5943	0.05648	14.4891	0.0553056	14.1487	0.055554	13.8234	0.055804	13.5123	0.0560555	13.2144	0.0563086	12.9289	0.0565632	12.6551	0.0568195	12.3923	0.0570774	13.2553	0.056418	13.2553	0.0562961	13.2553	0.0565399					13.8305	0.0570275	13.7364	0.0572727	13.6658	0.0573383	13.6531	0.0573748	13.6419	0.0575313	13.5634	0.057387	13.5597	0.0577128	13.5541	0.0573927	13.5524	0.0576202	13.5411	0.0571511
		13.5906	0.05591	14.4944	0.055317	14.1539	0.0555654	13.8285	0.0558154	13.5173	0.056067	13.2193	0.0563201	12.9337	0.0565748	12.6598	0.0568311	12.3969	0.057089	13.3375	0.0563471	13.3375	0.0562255	13.3375	0.0564687					13.8008	0.0569276	13.7069	0.0571686	13.6364	0.0571964	13.6238	0.0572651	13.6127	0.0574311	13.5342	0.0573193	13.5306	0.0576154	13.525	0.0573079	13.5233	0.0575416	13.5121	0.0570194
		13.5851	0.05672	14.5	0.0553384	14.1594	0.0555869	13.8339	0.055837	13.5225	0.0560887	13.2244	0.0563419	12.9387	0.0565967	12.6647	0.0568531	12.4017	0.0571111	13.4206	0.0562763	13.4206	0.056155	13.4206	0.0563975					13.7742	0.0568043	13.6805	0.0570422	13.61	0.0570365	13.5975	0.0571333	13.5864	0.0573076	13.5081	0.0572269	13.5045	0.0574948	13.4989	0.0571983	13.4972	0.0574387	13.486	0.0568688
		13.5722	0.05639	14.5054	0.0553679	14.1646	0.0556167	13.839	0.055867	13.5275	0.0561188	13.2293	0.0563722	12.9435	0.0566273	12.6694	0.0568839	12.4063	0.0571421	13.5047	0.0562056	13.5047	0.0560846	13.5047	0.0563266					13.7512	0.0566602	13.6576	0.0568962	13.5872	0.056862	13.5748	0.056982	13.5638	0.0571631	13.4855	0.0571115	13.4819	0.0573533	13.4763	0.057066	13.4747	0.0573133	13.4635	0.0567022
		13.5722	0.05624	14.5101	0.0554033	14.1692	0.0556523	13.8435	0.0559029	13.5319	0.056155	13.2336	0.0564087	12.9477	0.0566639	12.6736	0.0569208	12.4103	0.0571793	13.5899	0.056135	13.5899	0.0560144	13.5899	0.0562557					13.7323	0.0564979	13.6388	0.0567333	13.5683	0.0566761	13.5561	0.0568141	13.5451	0.0570005	13.4669	0.0569755	13.4633	0.0571937	13.4577	0.0569135	13.4561	0.0571681	13.4449	0.056523
		13.5501	0.05683	14.5137	0.0554417	14.1728	0.055691	13.847	0.0559418	13.5353	0.0561942	13.237	0.0564482	12.951	0.0567038	12.6768	0.0569609	12.4135	0.0572197	13.6761	0.0560646	13.6761	0.0559442	13.6761	0.056185					13.7177	0.0563207	13.6243	0.0565567	13.5539	0.0564826	13.5417	0.0566329	13.5307	0.0568228	13.4526	0.0568215	13.449	0.0570189	13.4435	0.0567437	13.4419	0.0570058	13.4306	0.0563346
		13.5501	0.05698	14.516	0.0554799	14.175	0.0557295	13.8492	0.0559806	13.5375	0.0562333	13.2391	0.0564876	12.9531	0.0567435	12.6788	0.057001	12.4155	0.0572602	13.7634	0.0559943	13.7634	0.0558742	13.7634	0.0561143					13.7079	0.056132	13.6145	0.0563699	13.5441	0.0562851	13.532	0.0564419	13.521	0.0566336	13.4429	0.0566525	13.4394	0.0568325	13.4338	0.0565601	13.4322	0.0568295	13.421	0.0561406
		13.5446	0.0562	14.5168	0.0555148	14.1758	0.0557647	13.8499	0.0560162	13.5382	0.0562692	13.2398	0.0565238	12.9538	0.05678	12.6795	0.0570379	12.4162	0.0572973	13.8517	0.0559241	13.8517	0.0558043	13.8517	0.0560439					13.7029	0.0559355	13.6096	0.0561764	13.5392	0.0560874	13.527	0.0562448	13.5161	0.0564365	13.4381	0.0564717	13.4345	0.0566381	13.4289	0.0563662	13.4273	0.0566428	13.4161	0.0559448
		13.5373	0.05625	ConcTikEll	ConcTikEll	ConcTikEll	ConcTikEll	ConcTikEll	ConcTikEll	ConcTikEll	ConcTikEll	ConcTikEll	ConcTikEll	ConcTikEll	ConcTikEll	ConcTikEll	ConcTikEll	ConcTikEll	ConcTikEll	13.9412	0.055854	13.9412	0.0557346	13.9412	0.0559735					13.7029	0.0557349	13.6096	0.0559801	13.5392	0.0558936	13.527	0.0560455	13.5161	0.0562355	13.4381	0.0562827	13.4345	0.0564394	13.4289	0.0561658	13.4273	0.0564491	13.4161	0.0557511
		13.5318	0.05577																	14.0317	0.0557841	14.0317	0.0556649	14.0317	0.0559032					13.7079	0.0555343	13.6145	0.0557848	13.5441	0.0557072	13.532	0.0558479	13.521	0.0560343	13.4429	0.0560892	13.4393	0.0562404	13.4338	0.0559627	13.4322	0.0562524	13.421	0.0555633
		13.53	0.05584																	14.1234	0.0557143	14.1234	0.0555954	14.1234	0.0558331					13.7177	0.0553375	13.6243	0.0555942	13.5539	0.055532	13.5417	0.0556557	13.5307	0.0558369	13.4526	0.055895	13.449	0.0560448	13.4435	0.0557609	13.4419	0.0560564	13.4306	0.0553849
		13.5135	0.05622																	14.2163	0.0556445	14.2163	0.055526	14.2163	0.0557631					13.7323	0.0551483	13.6388	0.0554121	13.5683	0.0553714	13.5561	0.0554728	13.5451	0.0556472	13.4669	0.0557037	13.4633	0.0558566	13.4577	0.0555643	13.4561	0.055865	13.4449	0.0552194
		13.5135	0.05623																	14.3104	0.055575	14.3104	0.0554567	14.3104	0.0556932					13.7512	0.0549705	13.6576	0.0552421	13.5872	0.0552284	13.5748	0.0553026	13.5638	0.0554688	13.4855	0.0555192	13.4819	0.0556793	13.4763	0.0553768	13.4747	0.0556818	13.4635	0.0550701
		13.5117	0.05697																	14.4057	0.0555055	14.4057	0.0553875	14.4057	0.0556235					13.7742	0.0548074	13.6805	0.0550874	13.61	0.055106	13.5975	0.0551486	13.5864	0.0553053	13.5081	0.0553451	13.5045	0.0555164	13.4989	0.055202	13.4972	0.0555105	13.486	0.0549399
		13.5026	0.05682																	14.5022	0.0554362	14.5022	0.0553185	14.5022	0.0555538					13.8008	0.0546623	13.7069	0.054951	13.6364	0.0550063	13.6238	0.0550137	13.6127	0.0551597	13.5342	0.0551846	13.5306	0.0553711	13.525	0.0550434	13.5233	0.0553543	13.5121	0.0548313
		13.5044	0.05608																	14.6	0.0553669	14.6	0.0552496	14.6	0.0554843					13.8305	0.0545379	13.7364	0.0548356	13.6658	0.0549315	13.6531	0.0549004	13.6419	0.055035	13.5633	0.055041	13.5597	0.0552463	13.5541	0.0549039	13.5524	0.0552163	13.5411	0.0547464
		13.5007	0.05637																	14.6	0.0553669	14.6	0.0552496	14.6	0.0554843					13.8626	0.0544368	13.7684	0.0547435	13.6977	0.0548829	13.6849	0.0548112	13.6736	0.0549335	13.5949	0.054917	13.5912	0.0551443	13.5856	0.0547864	13.5839	0.0550993	13.5727	0.0546869
		13.5026	0.05623																	IsoLine	IsoLine	ConcBand	ConcBand	ConcBand	ConcBand					13.8967	0.0543608	13.8022	0.0546764	13.7315	0.0548615	13.7185	0.0547476	13.7072	0.0548573	13.6283	0.0548151	13.6246	0.0550671	13.619	0.054693	13.6172	0.0550054	13.606	0.0546539
		13.4989	0.05589																											13.9319	0.0543115	13.8372	0.0546357	13.7665	0.0548677	13.7533	0.0547109	13.742	0.0548077	13.6629	0.0547372	13.6592	0.0550162	13.6536	0.0546257	13.6517	0.0549365	13.6405	0.0546481
		13.4771	0.0558																											13.9676	0.0542898	13.8728	0.0546221	13.802	0.0549014	13.7886	0.0547018	13.7772	0.0547859	13.698	0.0546849	13.6943	0.0549927	13.6887	0.0545857	13.6868	0.054894	13.6756	0.0546696
		13.4698	0.05664																											14.0032	0.0542962	13.9081	0.0546359	13.8373	0.0549619	13.8238	0.0547205	13.8123	0.0547922	13.733	0.0546591	13.7292	0.0549969	13.7236	0.0545739	13.7217	0.0548786	13.7104	0.0547179
		13.4463	0.05658																											14.0379	0.0543304	13.9426	0.0546768	13.8718	0.0550481	13.8581	0.0547666	13.8466	0.0548264	13.7671	0.0546605	13.7633	0.0550289	13.7576	0.0545903	13.7557	0.0548908	13.7445	0.0547922
		13.4409	0.05642																											14.0711	0.0543919	13.9756	0.0547441	13.9047	0.0551583	13.8909	0.0548393	13.8793	0.054888	13.7996	0.0546888	13.7958	0.0550879	13.7902	0.0546348	13.7882	0.0549301	13.777	0.0548909
		13.4463	0.05569																											14.1021	0.0544794	14.0064	0.0548364	13.9355	0.0552902	13.9215	0.0549371	13.9099	0.0549757	13.8301	0.0547437	13.8262	0.0551729	13.8206	0.0547065	13.8185	0.0549959	13.8073	0.0550122
		13.4391	0.05607																											14.1303	0.0545913	14.0344	0.054952	13.9634	0.0554415	13.9493	0.0550582	13.9377	0.0550878	13.8577	0.0548239	13.8539	0.0552821	13.8482	0.0548039	13.8462	0.0550869	13.835	0.0551538
		13.4318	0.05635																											14.1551	0.0547253	14.0591	0.0550885	13.9881	0.0556091	13.9739	0.0552001	13.9622	0.0552222	13.8821	0.0549281	13.8783	0.0554135	13.8726	0.0549252	13.8705	0.0552013	13.8593	0.0553127
		13.4102	0.05634																											14.1761	0.0548789	14.08	0.0552433	14.009	0.0557897	13.9947	0.0553601	13.983	0.0553761	13.9028	0.0550541	13.8989	0.0555644	13.8933	0.0550679	13.8911	0.0553369	13.8799	0.055486
		13.4066	0.05645																											14.1929	0.055049	14.0967	0.0554135	14.0257	0.0559799	14.0113	0.055535	13.9995	0.0555467	13.9193	0.0551994	13.9154	0.055732	13.9097	0.0552294	13.9076	0.0554911	13.8964	0.0556703
		13.4084	0.05592																											14.2052	0.0552324	14.1089	0.0555957	14.0378	0.0561759	14.0234	0.0557216	14.0116	0.0557306	13.9313	0.0553613	13.9274	0.055913	13.9217	0.0554065	13.9196	0.0556608	13.9084	0.055862
		13.403	0.0563																											14.2126	0.0554255	14.1163	0.0557863	14.0452	0.056374	14.0307	0.0559161	14.0189	0.0559242	13.9386	0.0555367	13.9347	0.0561039	13.929	0.0555958	13.9269	0.0558428	13.9157	0.0560573
		13.4354	0.05627																											14.2151	0.0556245	14.1188	0.0559816	14.0477	0.0565702	14.0332	0.0561148	14.0214	0.0561237	13.9411	0.055722	13.9372	0.056301	13.9315	0.0557934	13.9293	0.0560334	13.9181	0.0562525
		13.3941	0.05686
		13.3869	0.05633
		13.3869	0.05607
		13.3869	0.05655
		13.3833	0.05739
		13.3851	0.05633
		13.3708	0.05651
		13.369	0.05592
		13.369	0.05617
		13.3494	0.05706
		13.3511	0.05602
		13.3476	0.05608
		13.3458	0.05595
		13.3422	0.05667
		13.3387	0.05692
		13.3333	0.05585
		13.3156	0.0561
		13.312	0.05669
		13.3156	0.05614
		13.3156	0.05629
		13.3156	0.05627
		13.3156	0.05612
		13.3049	0.05628
		13.2979	0.05605
		13.2855	0.05641
		13.2802	0.05639
		13.2626	0.0565
		13.2626	0.0563
		13.2608	0.05709
		13.2626	0.05611
		13.245	0.05618
		13.245	0.05627
		13.2275	0.05699
		13.2275	0.05632
		13.2293	0.0563
		13.2205	0.05658
		13.21	0.0561
		13.217	0.05651
		13.1752	0.0575
		13.1718	0.05631
		13.1544	0.05619
		13.1406	0.05768
		13.1303	0.05607
		13.1234	0.05772
		13.1079	0.0569
		13.1062	0.05676
		13.1234	0.05653
		13.0668	0.05644
		12.9534	0.05644
		12.8535	0.05636
		IsoLine	IsoLine
[truncated: 174 more columns]

## Sheet: data
			Measured isotopic ratios								Isotopic ages and errors (Ma)
	U (ppm)	Th (ppm)	207Pb/235U	% error (2s)	206Pb/238U	% error (2s)	Error Correlation 6/38-7/35	207Pb/206Pb	% error (2s)	Error Correlation 38/6-7/6	207Pb/235U	error	206Pb/238U	error	207Pb/206Pb	error	concordance filter	Th/U	best age (Ma)	error (Ma)		Ti (ppm)	2s	Y (ppm)	2s	Nb (ppm)	2s	La (ppm)	2s	Ce (ppm)	2s	Pr (ppm)	2s	Nd (ppm)	2s	Sm (ppm)	2s	Eu (ppm)	2s	Gd (ppm)	2s	Tb (ppm)	2s	Dy (ppm)	2s	Ho (ppm)	2s	Er (ppm)	2s
NAV15-11
nrr_nav15_11_83	201.1	231.1	0.556	0.0071	0.07164	0.00064	0.81551	0.05573	0.00038	-0.073168	448.8	5	446	3.9	441	15	0.993761	1.11111	446	3.9		11.5	2	1501	34	1.55	0.24	0.046	0.018	22.3	1.3	0.444	0.074	5.91	0.54	6.42	0.76	2.08	0.23	38.2	2.8	12	0.78	151	5.8	53.8	1.9	211.9	7.4
nrr_nav15_11_52	372	299.9	0.5692	0.0093	0.0717	0.0012	0.96035	0.05756	0.00023	0.088191	457.4	6	446.4	7.1	512.7	8.8	0.975951	0.796178	446.4	7.1		5.6	1.7	765	44	3.5	0.38	0.227	0.036	43.3	2.7	1.83	0.24	10	1.2	9.9	1.2	7.87	0.99	31.5	2.1	9.25	0.7	92.7	6.1	26.4	1.4	115.4	6.4
nrr_nav15_11_23	353	279.7	0.5746	0.0085	0.072	0.001	0.95199	0.05775	0.00026	-0.10705	460.9	5.5	448.1	6	522.1	9.2	0.972228	0.786782	448.1	6		5.8	1.5	738	28	2.58	0.3	1.1	0.21	32.8	2.4	1.97	0.29	10.3	1.5	9.2	1.1	7.8	1.3	29.8	2.9	8.09	0.82	88.9	5.8	27.5	1.6	98.9	4.1
nrr_nav15_11_77	472	379	0.5567	0.0064	0.07213	0.00088	0.93571	0.05603	0.00026	-0.034351	449.3	4.2	448.9	5.3	453	10	0.99911	0.798085	448.9	5.3		4.7	1.8	681	24	3.18	0.28	0.015	0.011	27.8	1.6	0.094	0.023	1.45	0.33	1.76	0.26	0.95	0.16	11.5	1.1	4.19	0.35	53.1	2.1	22.8	1.1	102.6	3.1
nrr_nav15_11_25	316	141	0.562	0.012	0.0725	0.0016	0.96867	0.05628	0.00028	0.20442	452.3	8	450.9	9.8	463	11	0.996905	0.422833	450.9	9.8		6.4	2.4	840	180	1.86	0.41	0.028	0.02	11	2.1	0.183	0.061	1.98	0.37	3.2	1.1	1.8	0.57	20.2	5.7	6.3	1.7	77	19	28.5	6.4	113	21
nrr_nav15_11_103	278	210.8	0.5663	0.0073	0.07257	0.00095	0.90331	0.05613	0.00032	-0.010662	455.5	4.7	451.6	5.7	457	13	0.991438	0.746269	451.6	5.7		4.5	1.6	432	14	1.62	0.21	0.0044	0.0038	20.18	0.93	0.076	0.032	0.93	0.19	1.03	0.25	0.478	0.089	7.1	1	2.39	0.17	33.9	1.5	13.71	0.6	66.9	2.7
nrr_nav15_11_43	153.6	114.4	0.5641	0.0075	0.07263	0.00074	0.83391	0.05623	0.00036	-0.073529	454.1	4.9	452	4.5	461	14	0.995375	0.734754	452	4.5		8.4	1.9	459	18	1.3	0.19	0.0064	0.0075	13.83	0.74	0.069	0.027	0.71	0.21	0.96	0.24	0.494	0.091	6.78	0.65	2.67	0.21	35.2	2.1	14.25	0.74	71.3	3.2
nrr_nav15_11_42	165	110.2	0.6189	0.0079	0.073	0.001	0.33762	0.06166	0.00086	0.43241	490	4.7	454.4	6	660	30	0.927347	0.633312	454.4	6		4.1	1.2	463	34	1.11	0.15	0.042	0.015	12.98	0.66	0.434	0.062	2.79	0.32	3.55	0.52	2.02	0.18	16.6	2.3	4.82	0.68	50.9	5	16	1.4	65.5	5.5
nrr_nav15_11_107	283.7	106	0.567	0.0078	0.07305	0.00098	0.96607	0.05605	0.0002	-0.23536	455.9	5.1	454.5	5.9	454.2	7.7	0.996929	0.378644	454.5	5.9		6.5	1.3	563	25	1.55	0.18	0.062	0.015	9.28	0.6	0.15	0.039	1.16	0.34	1.28	0.24	0.59	0.1	9.2	1.4	3.53	0.24	49.7	2.5	18.94	0.85	89.5	3.7
nrr_nav15_11_84	279	193.2	0.5717	0.0083	0.07307	0.00093	0.92907	0.05642	0.0003	-0.083307	459	5.3	454.6	5.6	469	12	0.990414	0.677507	454.6	5.6		2.9	1.2	311.6	9.1	1.25	0.16	0.015	0.011	17.6	1	0.068	0.03	1.1	0.19	1.29	0.32	0.491	0.051	6.03	0.81	2.1	0.22	26.6	2.5	10.24	0.64	46.4	2.2
nrr_nav15_11_74	120.9	61.6	0.566	0.0088	0.0731	0.001	0.90532	0.05603	0.0004	-0.16245	455.3	5.7	454.7	6	453	16	0.998682	0.513347	454.7	6		3.07	0.95	337	16	0.84	0.17	0.018	0.012	7.97	0.51	0.065	0.027	0.76	0.23	0.9	0.24	0.402	0.09	6.1	1.1	2.03	0.25	27.1	1.8	10.86	0.78	50.7	2.9
nrr_nav15_11_20	281.2	84.9	0.5644	0.0066	0.07311	0.00065	0.93374	0.05629	0.00025	-0.18178	454.3	4.3	454.9	3.9	463.4	9.9	1.00132	0.296736	454.9	3.9		4.3	1.6	514	21	1.42	0.2	0.017	0.016	7.62	0.47	0.06	0.027	0.71	0.2	1.11	0.2	0.58	0.12	8.6	1.1	3.03	0.24	45.3	1.4	17.81	0.99	80.1	3.8
nrr_nav15_11_96	356	241.4	0.5729	0.0074	0.07317	0.00096	0.9207	0.05605	0.00024	0.14433	459.8	4.7	455.2	5.7	454	9.6	0.989996	0.676133	455.2	5.7		4.3	1.3	574	16	2.93	0.23	0.007	0.007	25.7	1.4	0.079	0.032	1.07	0.29	1.44	0.38	0.751	0.087	8.96	0.82	3.41	0.28	47	3	17.5	0.64	85.2	3.7
nrr_nav15_11_102	363	246.9	0.5663	0.0072	0.07325	0.00097	0.95562	0.05613	0.00022	-0.056683	455.5	4.7	455.7	5.9	458.8	8.2	1.00044	0.660066	455.7	5.9		4.8	1.2	449	16	2.23	0.24	0.0016	0.0022	24.04	0.84	0.101	0.036	0.95	0.16	1.39	0.33	0.66	0.13	8.5	1.1	3.06	0.27	39.9	2	14.66	0.48	72.1	2.4
nrr_nav15_11_60	355	108	0.5699	0.0068	0.07336	0.00084	0.94166	0.05666	0.00022	0.2968	457.9	4.4	456.3	5.1	478.1	8.5	0.996506	0.296736	456.3	5.1		5.9	2	728	28	2.69	0.27	0.024	0.011	10.88	0.59	0.109	0.038	0.98	0.22	1.44	0.28	0.66	0.13	12.5	1.1	4.71	0.25	59.2	2.8	22	1.2	119.7	5.5
nrr_nav15_11_4	219	102.4	0.5627	0.0082	0.07339	0.00098	0.8957	0.05573	0.00038	0.064348	453.2	5.4	456.5	5.9	441	15	1.00728	0.473709	456.5	5.9		6.1	1.7	513	20	1.89	0.2	0.031	0.014	10.91	0.69	0.072	0.035	0.82	0.15	1.46	0.27	0.82	0.14	8.9	1.1	2.93	0.3	38.8	2	16.44	0.93	82.1	3.7
nrr_nav15_11_19	191	103	0.572	0.0075	0.07349	0.00085	0.85103	0.05633	0.00042	0.13037	459.2	4.8	457.2	5.1	465	17	0.995645	0.549451	457.2	5.1		6.1	2	431	21	1.37	0.2	0.029	0.021	10.99	0.8	0.069	0.032	0.67	0.15	0.87	0.24	0.48	0.12	6.24	0.88	2.22	0.22	34.8	2	14.36	0.92	63.4	3.1
nrr_nav15_11_78	461	290.3	0.5735	0.0078	0.07354	0.00097	0.9493	0.05624	0.00023	-0.057627	460.2	5	457.4	5.8	463.3	8.4	0.993916	0.614251	457.4	5.8		6.6	1.6	836	26	4.64	0.41	0.0041	0.0066	33	1.3	0.094	0.032	1.39	0.32	1.97	0.3	0.93	0.14	12.5	1.5	4.7	0.33	67.8	2.9	29.2	1.5	125.9	5.7
nrr_nav15_11_53	447	404.4	0.5726	0.0076	0.07356	0.00095	0.9385	0.05648	0.00023	0.107	459.6	4.9	457.6	5.7	471.1	9	0.995648	0.895255	457.6	5.7		3.3	1.5	492	14	2.42	0.3	0.114	0.019	31	1.1	0.602	0.065	3.49	0.49	3.53	0.48	2.04	0.25	14.9	1.4	4.26	0.23	52.4	3.3	15.94	0.99	79.3	3.2
nrr_nav15_11_88	157.2	181.7	0.5737	0.0081	0.07358	0.00085	0.90675	0.05591	0.00036	-0.256	460.3	5.2	457.7	5.1	448	14	0.994352	1.08814	457.7	5.1		13.6	2.4	1410	39	1.21	0.18	0.052	0.024	19.26	0.54	0.507	0.081	6.53	0.56	6.37	0.84	2.21	0.24	39.8	2	12.57	0.7	145.6	7.2	47.9	1.6	205.5	8.5
nrr_nav15_11_71	311	234.3	0.5769	0.007	0.07361	0.00093	0.92629	0.05672	0.0003	0.40147	462.4	4.5	457.9	5.6	480	12	0.990268	0.73692	457.9	5.6		5.4	1.5	510	15	2.6	0.28	0.0075	0.0056	32.2	1.7	0.052	0.021	1.21	0.28	1.69	0.38	0.77	0.14	11.7	1	3.87	0.34	41.7	1.8	16.81	0.82	75.1	2.9
nrr_nav15_11_17	342	192.7	0.5747	0.0071	0.07368	0.00079	0.95114	0.05639	0.00022	0.064438	461	4.6	458.3	4.8	467.6	8.5	0.994143	0.562746	458.3	4.8		5	1.5	537	16	2.96	0.32	0.0045	0.0085	23.44	0.98	0.085	0.025	0.94	0.17	1.45	0.29	0.66	0.11	8.76	0.93	2.85	0.19	43.8	2.1	18.32	0.75	81.9	3.8
nrr_nav15_11_18	163.7	48.78	0.5724	0.0083	0.07368	0.00083	0.84738	0.05624	0.00043	0.0082406	459.5	5.3	458.3	5	461	17	0.997388	0.303767	458.3	5		6.7	1.7	485	14	1.36	0.16	0.0044	0.0062	7.68	0.58	0.049	0.018	0.48	0.12	1.07	0.25	0.504	0.072	8.41	0.93	2.63	0.21	37.6	1.9	15.38	0.68	69.7	2.8
nrr_nav15_11_94	346	243	0.582	0.008	0.0738	0.0011	0.93707	0.05683	0.00031	0.081092	465.6	5.1	458.9	6.5	484	12	0.98561	0.691898	458.9	6.5		4.8	1.5	547	16	2.51	0.27	0.031	0.018	23.85	0.92	0.102	0.029	1.14	0.38	1.4	0.24	0.67	0.12	9.2	1.2	3.09	0.24	45.3	2	16.33	0.89	83.6	3.9
nrr_nav15_11_8	235	243.5	0.581	0.011	0.0738	0.0014	0.9592	0.05698	0.00032	0.26692	464.7	7.3	459	8.7	490	12	0.987734	1.02354	459	8.7		7	2.2	702	42	2.05	0.26	0.265	0.073	25	1.6	0.57	0.13	3.76	0.61	4.32	0.85	2.35	0.48	18.8	2.6	5.67	0.71	64.2	6.4	23.2	2.1	105.5	9.7
nrr_nav15_11_14	366	244.7	0.5711	0.0065	0.07383	0.0008	0.89864	0.0562	0.00023	0.099976	458.7	4.2	459.2	4.8	460.1	9.1	1.00109	0.687758	459.2	4.8		4.3	1.4	457	15	2.24	0.24	0.0017	0.0038	26.9	1.2	0.075	0.033	0.98	0.22	1.56	0.28	0.83	0.12	8.52	0.98	3.01	0.19	39.5	2	15.2	0.41	68.1	2.4
nrr_nav15_11_50	302.2	193.9	0.5733	0.0066	0.07387	0.0008	0.89621	0.05625	0.00028	0.18416	460.1	4.2	459.4	4.8	464	11	0.998479	0.630915	459.4	4.8		3.4	1.3	495	26	2.66	0.24	0.0084	0.0078	27.63	0.95	0.073	0.022	0.6	0.14	1.57	0.26	0.61	0.1	8.8	1.3	3.1	0.31	41.9	3.1	16.13	0.92	79.4	3.4
nrr_nav15_11_46	232	118.7	0.564	0.0086	0.0739	0.00096	0.92307	0.05577	0.00037	-0.11894	454	5.6	459.6	5.8	443	15	1.01233	0.484496	459.6	5.8		4.4	1.4	336	11	1.35	0.28	0.006	0.0062	10.73	0.72	0.04	0.017	0.56	0.13	0.9	0.21	0.539	0.086	6.1	0.58	2.132	0.095	27.8	1.6	11.29	0.33	55.7	2.3
nrr_nav15_11_22	181.7	58.4	0.5674	0.0067	0.07391	0.00088	0.84717	0.05584	0.00039	0.15779	456.3	4.3	459.7	5.3	448	16	1.00745	0.325945	459.7	5.3		6.8	1.3	409	14	1.41	0.24	0.0033	0.0071	7.87	0.49	0.058	0.022	0.69	0.15	1.03	0.16	0.361	0.098	5.78	0.79	2.13	0.22	34.5	1.7	13.18	0.91	61.9	3.1
nrr_nav15_11_80	350	161.5	0.5751	0.008	0.074	0.001	0.95565	0.05622	0.00023	0.088847	461.2	5.2	460	6.2	461	9.1	0.997398	0.455996	460	6.2		2.1	1.8	354	23	1.8	0.23	0.035	0.021	15.91	0.89	0.154	0.064	1.01	0.31	1.11	0.3	0.673	0.099	6.14	0.83	2.14	0.23	28.6	1.7	11.51	0.64	53.1	2.4
nrr_nav15_11_39	347	254.1	0.5726	0.0073	0.074	0.001	0.92302	0.05623	0.00029	0.16396	459.6	4.7	460	6.1	461	11	1.00087	0.733138	460	6.1		5.8	1.2	500	17	2.15	0.24	0.242	0.052	25.7	1.1	0.9	0.15	4.57	0.8	4.2	0.52	2.87	0.29	13.47	0.99	4.14	0.25	49.7	2.8	16.28	0.72	75.6	3.6
nrr_nav15_11_34	214.8	155.8	0.581	0.0075	0.07401	0.00093	0.88726	0.05697	0.00037	0.15774	465	4.8	460.2	5.6	490	14	0.989677	0.74129	460.2	5.6		13.9	5.5	543	21	0.63	0.16	0.088	0.04	12.37	0.69	0.327	0.056	2.57	0.39	2.98	0.57	1.8	0.2	15	2.2	4.4	0.32	51.6	3.7	17.57	0.69	82.2	4.1
nrr_nav15_11_90	265	266	0.5854	0.0076	0.07406	0.00084	0.91611	0.05682	0.0003	-0.096345	467.8	4.9	460.5	5.1	484	11	0.984395	1.00705	460.5	5.1		4	1.3	758	30	1.42	0.18	0.27	0.38	27.4	2	0.56	0.26	4.73	0.83	4.25	0.58	2.1	0.18	20.2	1.5	5.85	0.36	71	3.7	23.6	1.2	111.2	5.8
nrr_nav15_11_12	431	373	0.5767	0.0052	0.07405	0.00077	0.91616	0.05608	0.00025	0.34882	462.3	3.3	460.5	4.6	455	10	0.996106	0.879894	460.5	4.6		5.4	1.1	714	30	2.67	0.24	0.071	0.034	34.6	1.9	0.319	0.092	1.94	0.29	2.36	0.36	1.27	0.2	12.7	1.3	4.07	0.23	57.7	1.7	22.9	0.71	105.5	3.4
nrr_nav15_11_47	335	210	0.5788	0.0083	0.07407	0.00099	0.94237	0.05637	0.00027	0.1473	463.6	5.4	460.6	5.9	467	11	0.993529	0.626959	460.6	5.9		16	9.6	504	17	2.83	0.32	0.021	0.013	25.6	1.2	0.077	0.026	1	0.18	1.59	0.35	0.83	0.12	8.39	0.9	2.92	0.19	42	1.3	16.17	0.81	81.7	3.5
nrr_nav15_11_28	114.1	63.2	0.5749	0.0073	0.07406	0.00082	0.7625	0.05623	0.00056	0.068831	461.1	4.7	460.6	4.9	460	22	0.998916	0.565931	460.6	4.9		2.4	1.4	315	12	0.483	0.091	0.012	0.017	7.29	0.41	0.044	0.02	0.6	0.13	1.08	0.26	0.6	0.11	7.53	0.79	1.9	0.19	27.9	1.4	9.94	0.65	47.1	2.2
nrr_nav15_11_95	59.5	37.06	0.5748	0.0079	0.07408	0.00083	0.60418	0.05589	0.0006	0.21651	461	5.1	460.7	5	446	24	0.999349	0.591017	460.7	5		8.7	1.5	325	12	0.89	0.14	0.0117	0.0081	11.41	0.62	0.04	0.027	0.79	0.14	0.96	0.26	0.348	0.075	7.17	0.96	2.27	0.25	28.9	1.8	11.2	0.41	50.1	2.2
nrr_nav15_11_75	291	175.1	0.573	0.0099	0.0742	0.0012	0.96384	0.0558	0.00021	-0.032765	459.8	6.4	461.4	7.3	444.3	8.3	1.00348	0.571102	461.4	7.3		4.5	1.5	617	50	2.08	0.3	0.026	0.022	21.1	1.2	0.22	0.13	1.74	0.46	2.29	0.49	1.23	0.27	12.9	1.9	4.02	0.43	50.4	4.1	21.4	1.8	92	6
nrr_nav15_11_89	430	300.3	0.5866	0.007	0.07424	0.00087	0.93886	0.05664	0.00023	0.26382	468.6	4.5	461.7	5.2	477.3	9	0.985275	0.677966	461.7	5.2		2.7	1.2	525	42	2.8	0.29	0.144	0.035	28.4	2.2	0.657	0.098	3.9	0.48	2.81	0.37	1.93	0.2	13.7	1.4	3.93	0.24	47.2	3.4	16.7	1.4	75.4	6.6
nrr_nav15_11_31	150.9	242.3	0.5785	0.0075	0.07437	0.00073	0.7926	0.05658	0.00044	0.020314	463.4	4.8	462.4	4.4	474	17	0.997842	1.58604	462.4	4.4		15.8	1.3	1137	53	1.29	0.23	0.227	0.068	31.9	1.1	0.95	0.1	10.02	0.74	11.43	0.83	4.13	0.25	46.6	2.9	12.25	0.88	135.2	4.7	39.9	1.3	157.9	6.9
nrr_nav15_11_64	188	100.8	0.577	0.0097	0.0744	0.0011	0.94352	0.05642	0.00029	-0.24497	462.4	6.2	462.4	6.4	468	11	1	0.549149	462.4	6.4		3.07	0.95	317	13	1.45	0.19	0.013	0.0084	14.49	0.94	0.065	0.029	0.64	0.14	0.89	0.21	0.47	0.11	5.41	0.79	1.92	0.16	25	1.7	9.76	0.54	54.7	3.1
nrr_nav15_11_68	171.7	83.6	0.5704	0.0081	0.07437	0.00096	0.87827	0.05569	0.00038	0.10922	458.2	5.3	462.4	5.8	440	15	1.00917	0.473261	462.4	5.8		6.3	1.5	463	11	1.16	0.18	0.0055	0.0072	9.19	0.36	0.074	0.028	0.85	0.16	1.06	0.24	0.51	0.12	7.08	0.93	2.7	0.19	32.7	2.3	14.11	0.83	70.8	3.3
nrr_nav15_11_45	257.9	271	0.5773	0.007	0.07441	0.00076	0.87767	0.05607	0.00032	0.11489	462.6	4.5	462.7	4.6	455	13	1.00022	1.03734	462.7	4.6		4.2	1.9	1580	120	2.12	0.22	0.031	0.012	38	2	0.86	0.16	8.8	1.2	12.4	1.3	5.25	0.59	53.1	5.5	14.3	1.2	173	12	55.3	4.3	245	20
nrr_nav15_11_63	311	202	0.5769	0.0068	0.07445	0.00087	0.91041	0.05635	0.00028	0.21827	463.2	4.5	462.9	5.2	466	11	0.999352	0.635728	462.9	5.2		4.4	1.4	370	13	1.98	0.19	0.2	0.19	19.9	1.1	0.19	0.12	1.46	0.56	1.24	0.25	0.593	0.096	8.29	0.98	2.62	0.16	28.2	1.6	11.35	0.59	58.4	3.3
nrr_nav15_11_82	385	247.1	0.5829	0.0063	0.07457	0.00091	0.91748	0.05634	0.00026	0.39109	466.3	4.1	463.6	5.4	466	10	0.99421	0.637349	463.6	5.4		5.9	1.4	623	40	3	0.22	0.0058	0.0086	25.7	1.8	0.101	0.029	1.48	0.28	2.11	0.32	0.92	0.11	10.4	1.1	3.79	0.26	54.2	3.7	20.4	1.1	91.5	6.2
nrr_nav15_11_24	140.7	43.2	0.583	0.007	0.07459	0.00082	0.82199	0.05645	0.00046	-0.001995	466.3	4.5	463.7	4.9	469	18	0.994424	0.314465	463.7	4.9		5.2	2.2	341	16	0.83	0.12	0.0037	0.0079	6.32	0.49	0.06	0.026	0.58	0.16	0.78	0.2	0.404	0.077	4.95	0.55	1.8	0.25	27.3	2.1	11.11	0.63	51.7	3.9
nrr_nav15_11_73	356	320.4	0.5733	0.0071	0.07458	0.00093	0.9408	0.05592	0.00023	0.26483	460.8	4.7	463.7	5.6	449	9.1	1.00629	0.882613	463.7	5.6		3.8	1.4	803	28	1.71	0.23	1.02	0.2	27.8	1.4	0.83	0.11	5.19	0.61	4.59	0.55	1.91	0.26	19.6	1.3	6.48	0.44	73	3.3	27.5	1.2	115.9	4
nrr_nav15_11_57	253.8	165.8	0.579	0.0059	0.07461	0.00091	0.87344	0.0563	0.00038	0.41775	463.8	3.8	463.8	5.5	464	15	1	0.65703	463.8	5.5		3.7	1.5	587	23	2.32	0.2	0.006	0.0044	25.39	0.82	0.063	0.021	0.71	0.18	1.5	0.18	0.63	0.11	8.73	0.92	3.23	0.31	45.6	2.8	17.44	0.86	98.8	3.3
nrr_nav15_11_56	239	134.5	0.5772	0.0084	0.07443	0.00091	0.89985	0.05627	0.00039	-0.17468	462.5	5.4	463.8	5.6	462	15	1.00281	0.560538	463.8	5.6		3	1.5	425	17	1.8	0.22	0.0066	0.0039	18.1	1	0.114	0.035	0.84	0.19	1.42	0.19	0.77	0.13	8.24	0.83	2.65	0.25	35.6	2.5	13.37	0.53	70.7	2.7
nrr_nav15_11_66	194	177.7	0.5847	0.0057	0.07466	0.00099	0.75702	0.05686	0.00047	0.39159	467.4	3.6	464.1	5.9	485	18	0.99294	0.935366	464.1	5.9		6.6	1.1	434	18	1.19	0.17	0.055	0.017	13.2	1	0.116	0.034	1.31	0.29	1.57	0.44	0.74	0.13	8.95	0.88	2.89	0.21	35.2	1.9	13.3	0.83	65.3	3.4
nrr_nav15_11_104	193	110.9	0.5814	0.0085	0.0747	0.001	0.94024	0.05633	0.00027	-0.12454	466.4	5.2	464.2	6.1	465	10	0.995283	0.580046	464.2	6.1		4.9	1.6	222.1	8.4	1.1	0.17	0.0037	0.0037	14.82	0.65	0.056	0.026	0.39	0.13	0.61	0.22	0.3	0.082	3.85	0.75	1.4	0.17	17.8	1.1	6.96	0.44	35	2
nrr_nav15_11_29	236	58.61	0.5745	0.0079	0.0747	0.0011	0.87258	0.05607	0.00035	0.19452	460.8	5.1	464.3	6.3	454	14	1.0076	0.251256	464.3	6.3		1.4	1.3	255.3	9.7	1.12	0.16	0.012	0.017	6.66	0.48	0.019	0.018	0.137	0.084	0.34	0.14	0.219	0.067	3.04	0.53	1.22	0.16	19.4	1.2	8	0.51	40.5	1.9
nrr_nav15_11_11	95.5	47.75	0.5791	0.0089	0.0747	0.0011	0.81364	0.05655	0.00051	0.21955	463.7	5.7	464.4	6.4	473	20	1.00151	0.511771	464.4	6.4		9.5	1.8	367	15	0.82	0.17	0.0113	0.0088	9.17	0.47	0.071	0.033	0.76	0.2	1.14	0.24	0.481	0.068	6.84	0.91	2.1	0.16	29.4	1.5	12.3	0.62	56.8	2.3
nrr_nav15_11_36	446	321	0.5932	0.008	0.07472	0.00086	0.93005	0.05739	0.00028	-0.25295	472.8	5.1	464.5	5.2	506	11	0.982445	0.726216	464.5	5.2		4.8	1.2	772	53	3.29	0.29	0.5	0.16	38.3	1.9	1.05	0.24	4.9	1.2	4	0.79	2.51	0.44	17.4	2.7	6.1	0.78	75.4	7.2	24.8	1.4	116.7	6.7
nrr_nav15_11_62	220	161.1	0.5797	0.009	0.07471	0.00099	0.90257	0.05633	0.00037	-0.14799	464.1	5.8	464.5	6	465	15	1.00086	0.732601	464.5	6		4	1.2	530	23	1.06	0.15	0.017	0.011	15.5	1.1	0.243	0.031	2.53	0.38	3.03	0.48	1.22	0.18	15	1.5	4.13	0.39	45.6	2.6	15.98	0.99	78.8	4.1
nrr_nav15_11_99	206.3	80.59	0.5864	0.0071	0.07479	0.00079	0.92125	0.05651	0.0003	-7.3602e-05	468.5	4.5	464.9	4.7	472	12	0.992316	0.39984	464.9	4.7		5.5	1.6	892	33	2.22	0.29	0.0116	0.0063	10.69	0.52	0.095	0.031	0.78	0.2	1.77	0.26	0.84	0.13	13	1.1	5.02	0.45	75.4	3.5	29.3	1.1	138.6	5.6
nrr_nav15_11_106	218.4	126.3	0.5791	0.0089	0.0748	0.001	0.91899	0.05592	0.00036	0.10341	463.7	5.7	465	6.3	449	14	1.0028	0.597372	465	6.3		6.5	1.4	412.6	9.6	1.48	0.26	0.018	0.012	11.46	0.55	0.079	0.03	0.58	0.15	0.84	0.16	0.418	0.083	6.39	0.64	2.26	0.15	31.7	1.4	12.87	0.67	61.5	2.9
nrr_nav15_11_48	129	82.5	0.581	0.011	0.0748	0.0013	0.92382	0.05617	0.0004	-0.039415	464.8	7	465.2	7.6	458	16	1.00086	0.613874	465.2	7.6		6.4	1.9	406	50	0.76	0.15	0.0109	0.0065	10.32	0.93	0.151	0.074	1.38	0.43	1.91	0.56	0.63	0.16	7.7	1.6	2.47	0.41	31.7	4.5	12.2	1.5	64.7	7.5
nrr_nav15_11_1	265	150.2	0.5888	0.0065	0.07491	0.00077	0.87967	0.05706	0.00033	0.12353	470	4.2	465.7	4.6	493	13	0.990851	0.563698	465.7	4.6		3.6	1.4	590	17	2.15	0.2	0.027	0.014	19.6	0.98	0.239	0.051	1.94	0.24	2.73	0.32	1.71	0.1	15.6	1.5	4.46	0.36	50.1	2.5	18.18	0.91	85.5	3.3
nrr_nav15_11_85	137	75	0.583	0.011	0.0749	0.0014	0.92007	0.05602	0.00038	0.087915	466.1	7	465.7	8.1	452	15	0.999142	0.541419	465.7	8.1		4.4	1.7	313	18	0.81	0.12	0.0063	0.008	9.84	0.81	0.055	0.027	1.16	0.22	1	0.23	0.54	0.11	6.55	0.95	2.13	0.23	27.2	1.8	9.87	0.55	46.2	3.5
nrr_nav15_11_10	196.2	287.1	0.5769	0.007	0.07492	0.00078	0.85133	0.05608	0.0004	0.03114	462.4	4.5	465.7	4.7	455	16	1.00714	1.4892	465.7	4.7		11	2.1	1244	44	1.69	0.17	0.033	0.017	51.9	2.1	0.78	0.11	9.43	0.79	11.12	0.75	4.33	0.45	49.9	2.3	12.83	0.7	140.3	5.9	45.1	1.9	169.8	5.5
nrr_nav15_11_72	281	142.1	0.5771	0.0065	0.07493	0.00086	0.91881	0.05595	0.00028	0.26476	462.5	4.2	465.8	5.2	450	11	1.00714	0.510986	465.8	5.2		5.6	1.3	697	29	2.54	0.29	0.014	0.011	15.03	0.86	0.067	0.023	0.82	0.24	1.4	0.3	0.73	0.12	10.38	0.91	4.11	0.4	53.8	3.5	21.97	0.87	109.6	4.6
nrr_nav15_11_21	259	203.7	0.5837	0.0087	0.07495	0.00083	0.90836	0.05667	0.00034	-0.17514	466.7	5.5	465.9	5	481	14	0.998286	0.794281	465.9	5		7.3	2.7	478	28	1.7	0.25	0.12	0.085	14.1	1.1	0.076	0.022	0.76	0.21	1.09	0.28	0.556	0.085	7.46	0.83	2.42	0.24	41	3.2	14.9	1.1	68.6	6.9
nrr_nav15_11_2	246	181	0.589	0.0083	0.07497	0.00099	0.91702	0.05692	0.00032	0.096017	470.1	5.3	466	5.9	488	13	0.991278	0.697837	466	5.9		3.9	1.9	541	38	1.34	0.23	0.28	0.2	19.1	1.3	0.32	0.13	2.45	0.38	2.77	0.41	1.21	0.15	12.9	2	3.76	0.38	45	4.2	17.1	1.5	82	6.1
nrr_nav15_11_87	108.5	50.03	0.5829	0.0086	0.075	0.0011	0.82485	0.05585	0.00044	0.30596	466.2	5.5	466.2	6.5	446	17	1	0.455789	466.2	6.5		5.9	1.4	310	16	0.77	0.17	0.0104	0.008	7.68	0.58	0.106	0.042	1.15	0.27	1.02	0.23	0.45	0.12	5.81	0.92	1.98	0.2	27.1	2.8	9.71	0.75	46.1	2.6
nrr_nav15_11_13	569	326.1	0.5835	0.007	0.0751	0.0011	0.96852	0.0561	0.00021	0.45516	466.6	4.5	466.8	6.4	456	8.2	1.00043	0.575374	466.8	6.4		12.4	1.8	2381	88	3.18	0.25	0.021	0.014	29.2	1.4	0.172	0.042	2.24	0.31	6.22	0.66	4.54	0.34	56.5	3.1	17.2	0.85	219.9	5.8	81.9	2.4	328	15
nrr_nav15_11_98	411	326.5	0.5923	0.0086	0.07512	0.0009	0.93231	0.05669	0.00028	0.043887	472.2	5.5	466.9	5.4	481	11	0.988776	0.801282	466.9	5.4		3.7	1.5	404	11	1.96	0.16	0.0076	0.0072	24.2	1.2	0.128	0.039	1.13	0.28	1.34	0.23	0.599	0.079	8.35	0.69	2.92	0.33	33.7	2.6	12.59	0.6	58.3	1.7
nrr_nav15_11_93	181	105.5	0.587	0.009	0.0751	0.0013	0.92652	0.05614	0.00035	0.35172	468.8	5.7	466.9	7.7	460	13	0.995947	0.586166	466.9	7.7		6.4	1.7	307.6	9.2	1.39	0.18	0.0086	0.0049	16.7	1.1	0.058	0.024	0.93	0.28	1.03	0.19	0.5	0.1	6.15	0.8	1.88	0.13	28.1	2.1	9.65	0.39	47.1	2.2
nrr_nav15_11_37	251	72.11	0.5867	0.0076	0.0751	0.001	0.86756	0.05629	0.00039	0.17369	468.7	4.8	466.9	6	463	15	0.99616	0.2936	466.9	6		4.48	0.92	584	14	1.31	0.16	0.0043	0.0086	7.56	0.45	0.08	0.04	0.61	0.16	1.28	0.2	0.65	0.14	11.2	1.1	3.55	0.41	48.6	2.1	19.3	1.1	90.8	3.8
nrr_nav15_11_81	190	110.2	0.5831	0.0097	0.0751	0.0013	0.9318	0.05627	0.00034	0.23258	466.3	6.2	466.9	7.8	462	14	1.00129	0.558971	466.9	7.8		4.2	1.7	364	36	1.4	0.29	-0.0002	0.0032	10.3	1.5	0.039	0.017	0.69	0.22	1.04	0.27	0.61	0.11	6.31	0.99	2.5	0.4	33.2	4.4	12.7	1.6	52.2	5.3
nrr_nav15_11_44	298	231.5	0.584	0.0091	0.0751	0.0012	0.95139	0.05612	0.00028	0.06475	466.9	5.9	467	7	457	11	1.00021	0.749625	467	7		2.1	1	384	27	1.83	0.2	0.0123	0.0084	26.3	1.7	0.069	0.025	1.07	0.27	1.33	0.23	0.62	0.12	7.62	0.87	2.58	0.29	33.9	2.6	11.79	0.56	55.6	3
nrr_nav15_11_32	246	128.2	0.5812	0.0081	0.07516	0.00095	0.86637	0.05628	0.00043	0.018782	465.1	5.2	467.1	5.7	463	17	1.0043	0.518135	467.1	5.7		3.2	0.83	300	26	0.9	0.12	0.03	0.024	12.92	0.75	0.053	0.027	0.46	0.13	0.83	0.2	0.371	0.093	5.19	0.87	1.77	0.22	26.3	2.5	9.59	0.72	47.5	2.9
nrr_nav15_11_76	260	151.5	0.5832	0.0099	0.0752	0.0012	0.95442	0.05605	0.00029	0.040963	466.3	6.4	467.4	7.2	454	11	1.00236	0.56243	467.4	7.2		3	1.3	547	32	1.4	0.15	0.018	0.011	17.3	1.3	0.126	0.045	1.31	0.29	2.27	0.59	1.26	0.24	12.2	1.7	3.77	0.39	45.6	3.1	19.6	1.2	82	5.4
nrr_nav15_11_27	364	299.5	0.5857	0.0079	0.07527	0.0009	0.93543	0.05641	0.00025	-0.024678	468	5	467.8	5.4	468.4	9.7	0.999573	0.823045	467.8	5.4		2.3	1.5	654	21	2.23	0.22	0.137	0.073	30.5	1.4	0.155	0.043	1.76	0.33	3.01	0.31	1.28	0.21	12.9	1.5	4.26	0.33	61.5	3.4	21.81	0.86	97.4	5
nrr_nav15_11_100	185.6	116.5	0.5895	0.0092	0.0753	0.0013	0.87934	0.05639	0.0005	0.30224	470.4	5.9	468	7.6	467	20	0.994898	0.630915	468	7.6		2.8	1.5	368	15	1.01	0.16	0.0126	0.0087	12.74	0.56	0.116	0.035	1.29	0.27	1.3	0.3	0.65	0.11	8.3	1.1	2.34	0.19	30.5	1.6	11.76	0.73	58.4	3.1
nrr_nav15_11_70	306	184.2	0.587	0.011	0.0754	0.0013	0.95352	0.0565	0.0003	-0.0066622	468.8	7.1	468.3	7.6	472	12	0.998933	0.598086	468.3	7.6		5.4	1.5	584	33	2.84	0.25	0.035	0.024	22.79	0.91	0.111	0.037	1.24	0.27	1.57	0.28	0.764	0.09	10	1.2	3.73	0.36	43.7	2.4	18.5	1.1	90	4.9
nrr_nav15_11_30	313	187.1	0.584	0.0084	0.0754	0.0011	0.94094	0.0563	0.00028	0.37438	466.9	5.4	468.4	6.8	464	11	1.00321	0.589275	468.4	6.8		5.1	2.5	640	42	1.63	0.2	0.085	0.041	13.5	1.2	0.114	0.036	1.4	0.32	2.25	0.36	1	0.19	12.7	1.3	4.26	0.45	57.9	4	21.6	1.2	96	6.9
nrr_nav15_11_35	244.9	144.3	0.5918	0.0078	0.07541	0.00092	0.83778	0.05709	0.00036	0.39448	472.7	5.1	468.6	5.5	494	14	0.991326	0.584795	468.6	5.5		3.2	1.3	265	8.4	1.23	0.15	32	12	72	22	6.6	2.4	19.4	7.8	2.77	0.84	0.81	0.18	7.7	1.4	1.93	0.19	23.8	1.7	8.67	0.49	42.3	2.4
nrr_nav15_11_33	205	128.6	0.5844	0.0087	0.0754	0.0011	0.91479	0.05611	0.00035	0.19129	467.2	5.6	468.6	6.4	456	14	1.003	0.625	468.6	6.4		3.1	1.1	276	11	1.29	0.2	0.34	0.44	17.12	0.94	0.2	0.15	0.84	0.28	0.89	0.21	0.498	0.076	5.33	0.67	1.75	0.19	23.2	1.2	8.47	0.39	42	3.2
nrr_nav15_11_91	98.2	25.78	0.5913	0.0098	0.0755	0.0011	0.84034	0.05618	0.00048	0.054006	471.5	6.3	469.3	6.4	459	19	0.995334	0.269614	469.3	6.4		3.26	0.96	119.7	3.5	0.527	0.096	0.0024	0.0042	4.61	0.35	0.0091	0.0081	0.184	0.097	0.25	0.11	0.132	0.042	1.7	0.45	0.697	0.078	9.7	1	3.78	0.31	18.7	1.4
nrr_nav15_11_86	340	208.3	0.586	0.009	0.0755	0.001	0.93853	0.05627	0.00028	0.15853	469.2	6	469.3	6.1	465	12	1.00021	0.622665	469.3	6.1		3.4	1.2	533	17	2.73	0.26	0.036	0.016	23.2	1	0.271	0.047	1.49	0.38	2.07	0.4	1.11	0.18	10.1	1.1	3.73	0.28	46	1.8	16.82	0.67	82.1	2.7
nrr_nav15_11_6	371	412.4	0.5939	0.0076	0.0756	0.0011	0.9581	0.05699	0.00023	0.23339	473.3	4.8	469.7	6.5	490.9	8.9	0.992394	1.07296	469.7	6.5		5	1.2	470	23	2.91	0.3	0.0052	0.004	34.9	1.9	0.087	0.031	1.4	0.27	2.07	0.38	0.82	0.16	11.5	1	3.42	0.23	39.2	2.8	15.02	0.88	66.5	3.8
nrr_nav15_11_40	313	167.7	0.5878	0.0088	0.0756	0.001	0.93035	0.05632	0.00032	0.12304	469.3	5.6	469.7	6	467	13	1.00085	0.534188	469.7	6		3.9	1.1	571	19	3.17	0.28	0.0144	0.0094	22.3	1.1	0.091	0.034	0.84	0.21	1.54	0.35	0.85	0.14	9.5	1.1	3.37	0.23	45.7	2.3	18.64	0.98	86.2	3.6
nrr_nav15_11_59	222.9	129.5	0.5837	0.0078	0.07559	0.00099	0.9343	0.0563	0.00025	0.26634	466.7	5	469.7	5.9	464	9.7	1.00643	0.586166	469.7	5.9		3	1.2	364	15	1.49	0.17	0.0041	0.0035	19.48	0.94	0.074	0.032	0.77	0.18	1.09	0.2	0.53	0.1	7.49	0.97	2.44	0.26	32.1	2.5	11.21	0.77	63.7	2.8
nrr_nav15_11_79	116	59.5	0.589	0.01	0.07564	0.00098	0.89655	0.05658	0.00048	-0.21038	470.2	6.4	470	5.9	474	19	0.999575	0.505306	470	5.9		5.3	1.4	308	23	0.89	0.17	0.0042	0.0068	8.24	0.79	0.054	0.025	0.48	0.15	0.71	0.24	0.47	0.12	4.54	0.69	1.77	0.19	26.1	2.3	10.32	0.94	44.1	3.1
nrr_nav15_11_54	225.3	109.5	0.5839	0.0083	0.0757	0.001	0.92063	0.0561	0.0003	0.28159	466.8	5.3	470.1	6.2	456	12	1.00707	0.478011	470.1	6.2		7	1.7	492	23	1.49	0.21	0.0106	0.0056	10.91	0.47	0.064	0.03	0.69	0.16	1.13	0.26	0.65	0.14	8.5	0.82	2.67	0.24	38	1.8	14.97	0.95	80.4	5.6
nrr_nav15_11_9	318	251	0.5903	0.0078	0.07566	0.00083	0.95059	0.05651	0.00026	-0.16551	470.9	5	470.2	5	472	10	0.998513	0.784314	470.2	5		3.6	1.6	370	26	1.56	0.13	2.48	0.76	31.9	3.6	1.44	0.43	4.3	1.1	2.47	0.63	1.76	0.51	10.4	1.6	2.96	0.52	34	2.2	12.06	0.66	51.7	3.4
nrr_nav15_11_49	261	116	0.6054	0.0093	0.0759	0.0012	0.97288	0.0575	0.00023	0.4783	480.5	5.9	471.7	7.5	510.7	8.8	0.981686	0.442478	471.7	7.5		4.1	1.4	441	13	1.61	0.17	0.0061	0.005	15.6	0.78	0.086	0.031	0.84	0.23	1.37	0.18	0.85	0.14	9.11	0.89	2.87	0.19	42.6	1.9	14.12	0.71	70.8	3.7
nrr_nav15_11_92	283	244	0.5955	0.0067	0.07592	0.0008	0.87957	0.05631	0.00028	0.25378	474.3	4.3	471.7	4.8	464	11	0.994518	0.85034	471.7	4.8		5.7	1.6	461	56	1.36	0.25	0.0103	0.0092	20.1	1.1	0.125	0.042	1.29	0.25	1.35	0.28	0.71	0.12	8.4	1.2	2.87	0.33	38.6	4.7	14.8	1.8	72.9	9.7
nrr_nav15_11_5	276	158.7	0.5878	0.0063	0.07602	0.00091	0.91972	0.05619	0.00029	0.4799	469.4	4	472.3	5.4	459	11	1.00618	0.587544	472.3	5.4		4.9	1.3	442	11	1.88	0.2	0.0024	0.0044	17.34	0.83	0.078	0.041	0.75	0.19	1.24	0.29	0.66	0.14	8	1	2.83	0.27	35.2	1.6	13.97	0.73	69.3	2.8
nrr_nav15_11_61	427	317	0.601	0.011	0.0761	0.0015	0.97623	0.05768	0.00025	0.3026	479	7.4	472.7	9.2	517.5	9.5	0.986848	0.734754	472.7	9.2		6.7	1.7	705	89	3.28	0.29	0.104	0.072	32.2	4.1	0.87	0.5	4.8	2.5	5	2.2	5	2.8	22.8	7	6.2	1.6	65	12	21.5	2.5	105	7.8
nrr_nav15_11_69	295	165.1	0.5877	0.0067	0.07616	0.00082	0.95121	0.05607	0.00022	0.13008	469.3	4.3	473.1	4.9	456.5	8.3	1.0081	0.57241	473.1	4.9		3.3	1.1	357	16	1.89	0.22	0.0085	0.0075	19.7	1.1	0.07	0.028	0.79	0.23	1.11	0.21	0.57	0.096	6.57	0.79	2.12	0.18	26.3	1.9	11.12	0.88	53.2	3.1
nrr_nav15_11_26	332	183.1	0.6037	0.0096	0.0762	0.0012	0.93118	0.05772	0.00034	0.26526	479.4	6.1	473.5	7.1	521	12	0.987693	0.58072	473.5	7.1		3.3	1.4	462	21	2.18	0.26	0.061	0.029	22.5	1.2	0.151	0.046	1.26	0.24	2.05	0.36	1.06	0.13	8.98	0.95	3.18	0.34	43.6	3	15.88	0.86	67.7	4.3
nrr_nav15_11_38	85.6	34.25	0.6005	0.0095	0.07629	0.0009	0.88124	0.0569	0.0005	-0.34077	477.4	6.1	473.9	5.4	487	19	0.992669	0.40032	473.9	5.4		5.5	1.4	164.3	6.4	0.59	0.15	0.012	0.011	5.13	0.35	0.028	0.014	0.25	0.14	0.41	0.12	0.224	0.052	3.08	0.54	0.91	0.14	12.4	1.3	4.83	0.41	26.8	1.3
nrr_nav15_11_105	274.7	222.9	0.5977	0.0097	0.0763	0.001	0.94307	0.05676	0.00026	-0.22797	475.6	6.2	474.2	6.1	482	10	0.997056	0.819672	474.2	6.1		4.8	1.2	663	22	1.24	0.2	4.8	1.8	54	14	4.8	1.8	15.6	5	4.67	0.8	1.49	0.15	17.5	1.8	5.3	0.35	65.2	2.3	22.27	0.8	98.2	3.8
nrr_nav15_11_16	305	175	0.594	0.01	0.0762	0.0013	0.96641	0.05653	0.00022	0.25246	473.2	6.5	474.8	8.3	473	8.5	1.00338	0.584795	474.8	8.3		3.7	1.4	543	41	2.71	0.29	0.043	0.028	22.6	2.4	0.29	0.2	1.84	0.79	2.02	0.68	0.96	0.28	11	1.8	3.46	0.63	44.8	6.5	18.8	1.9	83.3	5.1
nrr_nav15_11_15	288	179.6	0.5971	0.006	0.07653	0.0008	0.91442	0.05644	0.00028	0.086001	475.3	3.8	475.4	4.8	469	11	1.00021	0.62461	475.4	4.8		5.2	1.4	414	26	1.87	0.22	0.059	0.024	19	1.4	0.06	0.029	0.87	0.16	1.49	0.32	0.58	0.13	7.01	0.86	2.47	0.21	33.9	1.9	13.6	0.65	60.2	3.2
nrr_nav15_11_3	132.8	93.1	0.5999	0.0089	0.0772	0.0011	0.85514	0.05644	0.00042	0.17961	477	5.7	479.3	6.4	469	16	1.00482	0.669344	479.3	6.4		7.3	1.5	444	21	1.12	0.14	0.0174	0.0078	10.07	0.48	0.089	0.029	1.02	0.18	1.38	0.21	0.79	0.15	8.5	1.1	2.65	0.24	36.1	2.1	14.3	1.1	69.1	3.1
nrr_nav15_11_51	217	118.5	0.606	0.01	0.0778	0.0012	0.95577	0.05636	0.00027	-0.13889	481	6.3	482.9	6.9	466	11	1.00395	0.551268	482.9	6.9		680	170	222.6	7.1	1.53	0.24	2.1	1.4	28.2	8.4	1.37	0.97	4.1	2.6	1.13	0.41	0.494	0.092	5.27	0.89	1.35	0.19	19.9	2	6.88	0.48	34.9	2.6
nrr_nav15_11_101	386	172.7	1.363	0.018	0.144	0.0018	0.94894	0.06849	0.00026	0.14843	874.2	7.7	867	10	883.3	7.7	0.991764	0.425351	867	10		3	1.1	1029	34	6.33	0.42	2.65	0.56	38.5	4.6	3.6	0.85	12.7	2.7	3.33	0.54	0.475	0.068	14.8	1.7	6.19	0.54	87.6	4.4	34.7	1.7	170.5	6.1
lead loss likely
nrr_nav15_11_41	448	498	0.523	0.014	0.0644	0.0017	0.98572	0.05865	0.00027	0.1435	426.9	9.1	402	10	554	10	0.941673	1.10193	402			9.3	1.6	1550	200	2.29	0.31	1.75	0.29	65.9	9.5	7.8	1.4	39.8	6.9	33	5.7	27.8	5.2	101	19	25.2	4.3	212	33	53.9	7.7	191	24
nrr_nav15_11_58	384	368	0.548	0.01	0.068	0.0014	0.95655	0.05814	0.00041	0.64278	443.7	6.7	423.9	8.5	534	16	0.955375	0.961538	423.9			9.1	1.4	1023	65	1.81	0.21	0.345	0.073	35.3	3	3.88	0.7	20.6	3.5	15.3	2.8	11.2	2	46	6.5	12.9	1.8	125	15	34.8	3.2	150	11
nrr_nav15_11_7	281	190	0.548	0.014	0.0682	0.0017	0.96104	0.05777	0.00043	0.073546	443	9.3	425	10	523	16	0.959368	0.631712	425			8.1	1.8	1080	160	2.13	0.37	0.74	0.2	20.6	3	2.23	0.61	12.8	3.3	11.4	2.6	6.6	1.9	41.5	9.2	11.5	2.3	117	21	37.4	6.6	154	23
nrr_nav15_11_65	480	447.8	0.572	0.012	0.0705	0.001	0.90872	0.05924	0.00053	-0.32103	459.1	7.8	439	6.2	575	19	0.956219	0.902527	439			5.7	1.3	914	31	3.76	0.38	0.287	0.054	42.4	2.5	1.69	0.3	10	1.7	8.7	1.2	6.18	0.66	32.5	3.3	9.58	0.71	90.2	4.3	28.6	1.2	131.4	5.3
discordant
nrr_nav15_11_67	872	863	0.484	0.011	0.056	0.0013	0.99159	0.06279	0.00016	-0.024305	402	8	351.5	7.9	700.9	5.3	0.874378	0.967773	351.5			13.5	2.3	2273	97	7.58	0.54	1.73	0.14	93.1	5.9	10.3	0.76	55.7	3.5	52.7	4.4	55.9	5	166	13	41.2	2.3	312	18	75.1	4.3	287	20
nrr_nav15_11_55	233	145	0.754	0.03	0.0822	0.0022	0.67224	0.068	0.0021	0.30872	569	17	509	13	856	65	0.894552	0.631313	509			8.7	2.3	640	160	1.71	0.36	0.133	0.065	18.4	3.8	1.22	0.59	7	3.1	7	3	4.4	2.1	23.6	7.6	7.5	2.6	63	11	18.3	3.7	80	10
nrr_nav15_11_97	240	147.3	1.93	0.28	0.0823	0.0022	0.90531	0.165	0.021	-0.86597	1050	100	510	13	2370	250	0.485714	0.605694	510			3.9	1.5	413	54	1.47	0.22	0.23	0.092	23.8	2.5	1.44	0.5	7.5	2.6	4.9	1.6	4.2	1.4	20.4	6.4	5.1	1.3	52	11	14.2	2.7	55.1	6.5
NAV15-12
nrr_NAV15_12_141	226	100	0.5561	0.0069	0.07203	0.00068	0.84925	0.0559	0.00041	-0.071888	448.9	4.5	448.4	4.1	448	16	0.998886	0.442478	448.4	4.1		4.4	1.3	480	77	1.35	0.29	0.0122	0.0066	13.8	2.1	0.04	0.027	0.86	0.27	1.51	0.39	0.65	0.18	7.7	1.7	2.85	0.58	33.8	5.7	14.2	2.4	76	13
nrr_NAV15_12_148	363	244.3	0.5585	0.0049	0.07233	0.00057	0.8596	0.05604	0.00029	-0.027661	450.5	3.2	450.2	3.4	454	11	0.999334	0.673003	450.2	3.4		4.4	1.5	499	17	2.32	0.3	0.0054	0.0054	24.2	1.3	0.051	0.02	0.9	0.23	2.02	0.47	0.74	0.11	9	1.2	3.48	0.27	38.4	2.5	15.3	1	74.9	4
nrr_NAV15_12_50	708	426.6	0.566	0.0069	0.07257	0.00098	0.95813	0.05652	0.00023	0.084632	455.3	4.5	451.6	5.9	472.6	8.9	0.991873	0.602542	451.6	5.9		8.2	1.5	1338	61	5.58	0.39	0.88	0.13	69.5	4.8	4.26	0.56	39.1	5.1	21	2.6	9.21	0.84	37.8	3.8	12.8	1.2	135.6	6.9	44.9	2.5	200.6	9.5
nrr_NAV15_12_23	202	78.7	0.5613	0.0052	0.07258	0.0006	0.81784	0.05596	0.00027	-0.033855	452.3	3.4	451.7	3.6	452.8	9.8	0.998673	0.389604	451.7	3.6		3.5	1.1	459	26	1.39	0.18	0.0032	0.0037	13.9	1.3	0.038	0.012	0.61	0.23	1.72	0.39	0.51	0.13	7.9	1.2	2.75	0.32	34	3.3	15	1.5	71.8	5
nrr_NAV15_12_24	264	165.8	0.5659	0.0065	0.07281	0.00073	0.9495	0.05647	0.00024	-0.26552	455.3	4.2	453	4.4	470.7	9.3	0.994948	0.62803	453	4.4		5	1.3	605	44	1.31	0.2	0.039	0.01	15.8	1.1	0.111	0.023	2.45	0.47	3.74	0.51	1.56	0.21	15.3	1.8	4.81	0.58	51.6	5	19.3	1.6	89.3	6
nrr_NAV15_12_83	195	105.3	0.5672	0.006	0.07282	0.00067	0.76398	0.05663	0.00033	0.17999	456.1	3.9	453.1	4	477	13	0.993422	0.54	453.1	4		3.1	1	449	49	0.84	0.16	0.0094	0.0061	12.37	0.83	0.066	0.035	1.01	0.23	1.78	0.42	0.87	0.21	9.6	1.7	2.81	0.53	34.6	4.6	13.3	1.4	63.8	6.1
nrr_NAV15_12_124	461	270.7	0.5633	0.0056	0.07298	0.00073	0.93219	0.05608	0.0002	0.24253	453.6	3.7	454	4.4	456.9	7.3	1.00088	0.587202	454	4.4		3.4	1.5	524	30	2.86	0.31	0.001	0.0029	28.7	1.8	0.055	0.022	0.93	0.18	1.88	0.45	0.92	0.14	9.4	1.4	3.37	0.23	40.3	3.2	15.92	0.98	76.6	3.6
nrr_NAV15_12_145	265	187	0.5636	0.009	0.0728	0.0012	0.9509	0.0564	0.00025	-0.030422	453.7	5.8	454.4	7.3	468	10	1.00154	0.70566	454.4	7.3		4.4	1.8	747	86	1.19	0.19	0.0118	0.0062	19.9	2.8	0.208	0.062	3.91	0.52	5.35	0.92	1.96	0.29	21	2.5	6.04	0.74	64.6	8.6	22.1	2.6	103	13
nrr_NAV15_12_29	323	206	0.565	0.0041	0.07308	0.0005	0.83355	0.05608	0.00023	0.036055	454.8	2.6	454.7	3	455.2	9.1	0.99978	0.637771	454.7	3		2.2	1.1	338	7.4	1.57	0.16	0.004	0.0038	23.63	0.81	0.035	0.018	0.65	0.13	1.31	0.26	0.499	0.096	6.9	1	2.34	0.17	29.2	2.2	10.5	0.56	52.1	2.1
nrr_NAV15_12_149	836	464	0.5723	0.0053	0.07311	0.00062	0.91417	0.05653	0.0002	0.17523	459.5	3.4	454.9	3.7	473.2	7.7	0.989989	0.555024	454.9	3.7		4.3	1.3	1315	70	8.12	0.69	0.01	0.0074	58.4	3.7	0.063	0.02	1.55	0.28	3.34	0.46	1.46	0.26	22.1	2	8.44	0.68	97.7	5.7	40.9	2.6	205	13
nrr_NAV15_12_11	194	88.6	0.5669	0.0058	0.07315	0.00047	0.71143	0.05627	0.00044	-0.13281	456	3.7	455.1	2.8	462	17	0.998026	0.456701	455.1	2.8		5.3	1.8	532	28	1.64	0.17	0.0045	0.0038	16.69	0.86	0.052	0.019	0.94	0.29	1.91	0.32	0.586	0.076	9.19	0.97	3.28	0.3	40.4	3.3	16.4	1.4	80.9	5.8
nrr_NAV15_12_111	661	578	0.5833	0.0066	0.07322	0.0008	0.95158	0.05766	0.00022	-0.011663	466.5	4.3	455.5	4.8	516.7	8.3	0.97642	0.874433	455.5	4.8		8	1.8	2070	240	3.64	0.49	0.39	0.14	55.6	6.8	2.83	0.77	23	5.3	21.5	3.7	10.4	2.5	65.3	9.5	20.3	2.5	209	28	70.1	8.5	295	28
nrr_NAV15_12_3	326	194.8	0.571	0.0049	0.07324	0.00058	0.87455	0.05652	0.00024	0.090939	459.2	3.3	455.6	3.5	472.7	9.3	0.99216	0.597546	455.6	3.5		1.5	1	536	30	1.25	0.2	0.004	0.0043	20.88	0.77	0.052	0.019	1.04	0.22	1.5	0.33	0.72	0.12	10.2	1.2	3.46	0.34	39.5	3.1	17	1.1	86.4	3.7
nrr_NAV15_12_28	434	217.2	0.5661	0.0049	0.07325	0.00072	0.87982	0.05631	0.00022	0.29858	455.4	3.2	455.7	4.3	464.4	8.9	1.00066	0.500461	455.7	4.3		5.1	1.3	719	30	3.41	0.38	0.0104	0.0055	26.7	1.1	0.072	0.019	1.34	0.25	2.39	0.28	1.11	0.14	13.5	1.2	4.12	0.44	55.5	2.6	22.3	1.2	107.4	5
nrr_NAV15_12_172	578	265	0.5691	0.0061	0.0733	0.00078	0.91808	0.05647	0.00024	0.096337	457.3	4	456	4.7	470.7	9.5	0.997157	0.458478	456	4.7		2.9	1.3	855	30	5.35	0.33	0.288	0.086	39.2	2.4	0.296	0.051	2.54	0.46	3.04	0.51	1.32	0.14	14.9	1.1	5.61	0.3	69.5	2.4	27.46	0.9	132.1	5.5
nrr_NAV15_12_86	699	812	0.619	0.014	0.07332	0.00061	0.26184	0.0615	0.0014	0.12738	488.9	8.6	456.1	3.6	651	48	0.932911	1.16166	456.1	3.6		7.3	1.6	2720	100	4.29	0.33	0.179	0.075	53.4	3.3	1.3	0.34	16	2.9	19.5	2	7.8	0.89	82.6	4.5	24	1.2	257	13	90	4.5	388	20
nrr_NAV15_12_21	192	96	0.5726	0.0061	0.07333	0.00076	0.84525	0.05644	0.00029	0.21562	459.6	4	456.2	4.5	469	11	0.992602	0.5	456.2	4.5		2.6	1.6	374	50	0.84	0.14	0.0051	0.0038	12.1	1.5	0.036	0.016	1.37	0.4	1.44	0.46	0.7	0.2	8.8	1.8	2.84	0.51	29.8	4.4	12.3	1.9	54.1	7.5
nrr_NAV15_12_134	299	198.9	0.5696	0.0065	0.07336	0.00081	0.88751	0.05616	0.00032	0.0512	457.7	4.2	456.4	4.9	458	13	0.99716	0.665217	456.4	4.9		5.1	1.2	657	21	1.9	0.22	0.021	0.011	20	1.4	0.135	0.038	2	0.28	3.25	0.48	1.3	0.22	15.2	1.1	4.53	0.29	52.8	3.5	19.87	0.96	95.3	5.3
nrr_NAV15_12_49	313	151.7	0.6032	0.0083	0.07339	0.00074	0.80752	0.05969	0.0005	-0.24923	479.1	5.3	456.5	4.5	591	18	0.952828	0.484665	456.5	4.5		2.5	1	567	20	2.37	0.2	0.022	0.012	21.14	0.86	0.127	0.035	1.48	0.32	2.76	0.51	1.12	0.13	11.6	1	3.92	0.33	44.6	2.1	17.26	0.76	83.2	3.3
nrr_NAV15_12_14	655	386	0.5708	0.0056	0.07343	0.00066	0.90714	0.05638	0.0002	0.22475	458.4	3.6	456.8	4	467.2	8	0.99651	0.589313	456.8	4		4.5	1.6	1210	110	4.52	0.57	0.67	0.12	56.8	4.5	2.43	0.38	22.3	3.2	13	1.7	7.4	1.1	32.5	3.9	10.1	1	104	11	38.4	3.2	161	11
nrr_NAV15_12_147	245	113.5	0.5664	0.0091	0.07344	0.00096	0.73889	0.05612	0.0003	-0.37185	455.5	6	456.8	5.8	457	12	1.00285	0.463265	456.8	5.8		4.7	1.4	927	31	4.92	0.4	0.0079	0.0063	19.23	0.86	0.057	0.02	0.94	0.26	2.5	0.54	0.7	0.1	14.3	1	5.9	0.4	71.7	2.9	30.5	1.9	153.4	5.3
nrr_NAV15_12_155	329	198	0.5684	0.0075	0.07353	0.00084	0.90506	0.05613	0.0003	0.12842	456.9	4.8	457.4	5.1	457	12	1.00109	0.601824	457.4	5.1		3.4	1	727	62	1.46	0.22	0.0084	0.0051	21.2	1.7	0.138	0.036	2.22	0.54	3.71	0.77	1.48	0.22	17.2	2.5	5.71	0.66	61.7	6.7	23.4	2.3	106	11
nrr_NAV15_12_19	261	104.1	0.5676	0.0069	0.07353	0.00056	0.85369	0.05593	0.00037	-0.26305	456.4	4.5	457.4	3.4	449	15	1.00219	0.398851	457.4	3.4		2.9	1.4	477	26	2.08	0.24	0.0021	0.0024	16.4	1.1	0.061	0.017	0.82	0.26	1.52	0.33	0.62	0.13	7.9	1.3	2.51	0.21	33.7	1.6	13.91	0.87	74.6	4
nrr_NAV15_12_96	378	198	0.5665	0.0058	0.07367	0.00068	0.88764	0.05592	0.00029	-0.080489	455.7	3.8	458.2	4.1	449	11	1.00549	0.52381	458.2	4.1		3.5	1.2	642	15	2.97	0.3	0.023	0.011	21.49	0.9	0.185	0.057	1.74	0.34	2.21	0.38	1.3	0.23	11	1.4	3.91	0.23	46.7	2.1	19.2	0.84	96.4	3.6
nrr_NAV15_12_168	209.2	107.28	0.5753	0.0081	0.07374	0.00088	0.91792	0.05683	0.00027	-0.19215	461.3	5.2	458.6	5.3	485	11	0.994147	0.512811	458.6	5.3		10.1	1.8	1159	26	3.92	0.39	0.0043	0.0043	11.95	0.48	0.06	0.018	1.34	0.2	3.23	0.43	0.98	0.17	19	1.3	7.66	0.48	95	5	38.4	1.3	179.5	4.3
nrr_NAV15_12_135	317	257.9	0.5702	0.0057	0.07363	0.00063	0.86717	0.05604	0.00025	-0.048088	458.1	3.7	458.7	3.6	453.6	9.9	1.00131	0.813565	458.7	3.6		7.6	1.6	670	27	3.05	0.39	0.0112	0.0082	42.9	2.5	0.121	0.032	1.99	0.36	4.14	0.63	0.99	0.14	20.6	1.9	5.93	0.4	62.3	4.2	21.92	0.89	99.8	4.8
nrr_NAV15_12_153	417	225	0.5805	0.0065	0.07378	0.00083	0.91157	0.05723	0.00025	0.31102	464.7	4.2	458.9	5	500.2	9.4	0.987519	0.539568	458.9	5		3.8	1.2	686	55	3.44	0.41	0.0161	0.0075	28.1	2.2	0.116	0.021	1.59	0.21	2.81	0.4	1.3	0.2	11.3	1.5	4.34	0.28	53.3	4	21.3	1.6	108.3	8.1
nrr_NAV15_12_152	344	166.8	0.5808	0.0053	0.07381	0.00061	0.65601	0.05667	0.00041	0.23794	464.9	3.4	459	3.7	478	16	0.987309	0.484884	459	3.7		4.38	0.87	725	40	3.1	0.3	0.28	0.15	27.8	2.1	0.15	0.06	1.65	0.47	2.8	0.5	0.93	0.13	13.7	1.6	4.49	0.36	57.3	6.1	22.5	1.7	111.7	6.7
nrr_NAV15_12_151	287.3	174.6	0.5781	0.0053	0.07382	0.00074	0.84152	0.05635	0.00032	0.14431	463.2	3.4	459.1	4.4	466	12	0.991149	0.607727	459.1	4.4		5.6	2.1	1087	87	2.03	0.28	0.0175	0.0093	24.4	1.7	0.183	0.039	3.33	0.48	5.7	0.53	2.03	0.17	24.7	1.6	8.52	0.79	92.8	5.7	35.7	2.3	161	11
nrr_NAV15_12_128	156.5	88.3	0.597	0.012	0.07385	0.00055	0.70105	0.05845	0.00089	-0.37045	475	7.7	459.3	3.3	543	33	0.966947	0.564217	459.3	3.3		12	2.9	730	41	4.28	0.44	0.129	0.042	18.3	1.2	0.11	0.034	1.16	0.25	1.78	0.37	0.51	0.1	11.5	1.1	4.3	0.28	52.4	4	22.5	1.5	113	4.4
nrr_NAV15_12_12	279	172.3	0.5711	0.0039	0.07386	0.00056	0.7528	0.05612	0.00029	0.32572	458.7	2.5	459.4	3.3	457	12	1.00153	0.617563	459.4	3.3		2.6	1.6	622	21	1.63	0.17	0.0113	0.0075	17.59	0.91	0.101	0.025	1.89	0.3	3.28	0.53	1.3	0.12	14.7	1.3	4.37	0.31	50.2	2.5	18.9	1.1	92.9	4.8
nrr_NAV15_12_38	654	423.3	0.5736	0.0049	0.0739	0.00053	0.75821	0.05635	0.00027	0.045458	461	3.3	459.6	3.2	466	11	0.996963	0.647248	459.6	3.2		3.68	0.97	1136	67	5.66	0.55	0.093	0.034	43.4	2.8	0.111	0.04	1.81	0.34	3.58	0.52	1.65	0.23	21.6	1.4	6.93	0.46	84.2	5.2	35.1	1.7	170.8	9.1
nrr_NAV15_12_171	337	207.4	0.5718	0.0068	0.07391	0.00084	0.88439	0.05621	0.00031	0.15377	459.1	4.4	459.7	5.1	460	12	1.00131	0.61543	459.7	5.1		5.1	1.8	613	24	4.63	0.86	0.014	0.011	30	3.3	0.103	0.03	1.35	0.23	3.55	0.51	1.52	0.23	14.7	1.2	4.58	0.42	51.6	2.7	19.27	0.86	93.5	6
nrr_NAV15_12_169	476	294	0.61	0.015	0.074	0.0014	0.97771	0.05958	0.00031	-0.5811	483.1	9.2	459.9	8.7	588	11	0.951977	0.617647	459.9	8.7		6.3	2.5	870	180	4.12	0.92	26	11	176	44	12.9	3.5	62	11	18	2.2	6.1	1.6	26.2	4.6	8.2	1.8	81	19	27	5.8	122	26
nrr_NAV15_12_158	375.3	230.1	0.5903	0.0049	0.07396	0.00045	0.85376	0.0576	0.00027	-0.065234	471	3.1	460	2.7	514	10	0.976645	0.61311	460	2.7		6.6	1.4	735	24	2.29	0.21	0.0089	0.0069	23.14	0.91	0.124	0.033	1.61	0.31	2.72	0.53	1.26	0.14	13.98	0.87	4.49	0.32	54.7	2.5	22.87	0.71	111.2	4.6
nrr_NAV15_12_132	445	272.9	0.5727	0.0048	0.07401	0.00057	0.90405	0.05604	0.00023	0.13203	459.7	3.1	460.3	3.4	453.8	9	1.00131	0.613258	460.3	3.4		4.8	1.4	973	45	3.03	0.29	0.0102	0.0063	28.5	1.5	0.198	0.045	2.99	0.39	4.91	0.81	1.69	0.19	21.3	1.7	6.99	0.38	79	4.4	30.6	1.9	140.6	9.5
nrr_NAV15_12_161	451	171.6	0.5744	0.007	0.07403	0.0008	0.90779	0.0562	0.00028	0.034094	460.8	4.5	460.4	4.8	460	11	0.999132	0.380488	460.4	4.8		2.7	1.1	725	24	4.43	0.32	0.0012	0.0025	28.8	1.1	0.025	0.01	0.91	0.23	1.9	0.42	0.85	0.15	11.3	1.3	4.24	0.29	53.2	2.8	21.86	0.79	115.1	3.2
nrr_NAV15_12_97	418	223.4	0.598	0.0077	0.07405	0.00064	0.74071	0.05875	0.00053	-0.046954	475.8	4.9	460.5	3.8	560	19	0.967844	0.53445	460.5	3.8		4	1.5	781	49	4.1	0.37	0.034	0.021	27.9	2.2	0.114	0.032	1.36	0.31	2.34	0.48	1	0.21	12.5	1.4	4.18	0.4	54.3	4.8	23.4	1.8	125.2	9.7
nrr_NAV15_12_165	107.9	38.12	0.5709	0.0074	0.07408	0.00083	0.79328	0.05609	0.00043	0.089283	458.5	4.8	460.7	5	455	17	1.0048	0.35329	460.7	5		3.9	1.5	167.4	6.1	0.71	0.11	0.0102	0.0077	8.34	0.44	0.018	0.011	0.242	0.096	0.6	0.19	0.249	0.091	3.24	0.56	0.99	0.13	12.2	1.4	4.87	0.31	26	1.5
nrr_NAV15_12_4	309	152.8	0.5772	0.0052	0.0741	0.0005	0.72163	0.05664	0.00033	0.015229	462.6	3.3	460.8	3	480	12	0.996109	0.494498	460.8	3		4.5	1.6	782	37	2.79	0.36	0.0093	0.0057	24.9	1.5	0.048	0.018	1.11	0.32	2.26	0.43	0.92	0.15	13.64	0.94	4.87	0.42	56.3	3.1	23.9	1.5	123	8
nrr_NAV15_12_75	589	399.7	0.5744	0.0051	0.07409	0.0006	0.89215	0.05624	0.00023	0.040327	460.8	3.3	460.8	3.6	461.7	9	1	0.678608	460.8	3.6		3.15	0.68	922	39	4.84	0.34	0.0057	0.0047	43.6	2.4	0.068	0.023	1	0.3	2.21	0.46	1.04	0.11	13.9	1.1	4.94	0.46	62.1	3.6	27.2	1.3	146.6	6.8
nrr_NAV15_12_74	261	148	0.5721	0.0047	0.07411	0.00065	0.77629	0.05602	0.00031	0.24242	459.4	3.1	460.8	3.9	453	12	1.00305	0.56705	460.8	3.9		3.54	0.87	498	30	2.21	0.22	0.0031	0.0029	18.6	1.5	0.055	0.017	0.93	0.23	1.73	0.42	0.62	0.12	8.3	1.2	2.83	0.31	34.7	3.1	14.8	1.1	71.8	5.4
nrr_NAV15_12_26	216.5	126.7	0.5725	0.0055	0.07412	0.00057	0.55713	0.05583	0.00036	0.18775	459.5	3.5	460.9	3.4	445	14	1.00305	0.585219	460.9	3.4		4.6	1.3	335.1	9	1.14	0.12	0.0065	0.0057	16.11	0.9	0.041	0.018	0.65	0.15	1.36	0.2	0.55	0.12	5.53	0.77	2.16	0.22	26	1.5	10.5	0.41	52.8	1.8
nrr_NAV15_12_138	61.2	20.55	0.5716	0.0081	0.07413	0.00073	0.46747	0.05631	0.00067	0.34119	458.9	5.2	461	4.4	463	26	1.00458	0.335784	461	4.4		6.4	1.3	265.6	6.2	0.46	0.11	0.0108	0.0064	4.73	0.49	0.024	0.012	0.28	0.11	0.98	0.19	0.5	0.12	4.04	0.72	1.56	0.15	18.66	0.68	8.09	0.51	42.1	2
nrr_NAV15_12_70	425	320	0.585	0.0051	0.07416	0.00057	0.80467	0.05724	0.00033	0.15572	468.3	3.5	461.2	3.4	500	13	0.984839	0.752941	461.2	3.4		3	1.2	704	55	2.01	0.2	0.48	0.38	36.6	4.1	0.37	0.21	3.1	1.3	3.96	0.68	1.48	0.23	16	1.8	5.29	0.5	56.8	5.8	21.6	1.7	98.8	6.7
nrr_NAV15_12_10	288	165.3	0.5757	0.0064	0.07418	0.00066	0.80802	0.05623	0.00031	0.086527	461.6	4.1	461.3	3.9	461	12	0.99935	0.573958	461.3	3.9		4.4	1.6	591	28	1.99	0.25	0.159	0.031	24.1	1.4	0.118	0.032	1.79	0.36	2.53	0.35	0.87	0.11	13.3	1.7	4.25	0.37	47.5	3.2	18.2	1.4	89.2	4.3
nrr_NAV15_12_164	114.5	93	0.5714	0.0072	0.07418	0.00082	0.75552	0.05596	0.00052	0.3083	458.8	4.7	461.3	4.9	450	21	1.00545	0.812227	461.3	4.9		9.9	1.6	465	12	1.53	0.17	0.0126	0.0069	31.1	1.3	0.063	0.017	1.54	0.33	3.2	0.42	1.28	0.11	12.82	0.98	4.37	0.38	43.5	2.3	15.26	0.42	67.9	3
nrr_NAV15_12_114	51.4	54.72	0.5771	0.0087	0.07426	0.00047	0.50285	0.05601	0.00065	-0.074397	462.5	5.6	461.8	2.8	451	26	0.998486	1.06459	461.8	2.8		11.4	1.6	445	17	0.66	0.15	0.0088	0.0068	30.1	1.3	0.181	0.038	2.44	0.42	3.68	0.6	2.6	0.26	15.7	1.4	4.23	0.35	42	2.6	15.04	0.73	61.9	2.9
nrr_NAV15_12_8	350	203.9	0.5779	0.0053	0.07433	0.00062	0.85446	0.05648	0.00024	0.099689	463.7	3.3	462.2	3.7	471.1	9.4	0.996765	0.582571	462.2	3.7		4.7	1.4	460	23	2.24	0.26	0.002	0.0023	21.2	1.4	0.036	0.013	0.73	0.16	1.52	0.39	0.63	0.13	8.74	0.92	2.91	0.22	34.9	3.2	14.4	0.8	70.6	3.8
nrr_NAV15_12_31	395	298.1	0.5721	0.0055	0.07434	0.00059	0.84025	0.05595	0.0003	-0.0030319	459.3	3.5	462.2	3.5	450	12	1.00631	0.754684	462.2	3.5		4.5	1.6	1814	73	2.13	0.26	0.0287	0.0099	34.4	1.7	0.299	0.049	6.98	0.76	10.98	0.99	3.75	0.33	49.5	4.1	15.17	0.76	166.6	7.8	60.4	1.9	263.1	9.8
nrr_NAV15_12_17	276	141.8	0.5757	0.0051	0.07438	0.00065	0.75847	0.05619	0.00034	0.27644	461.6	3.3	462.5	3.9	459	13	1.00195	0.513768	462.5	3.9		4.3	1.2	566	44	2.37	0.27	-0.00060223	1.6e-07	20.5	1.5	0.048	0.018	0.91	0.24	1.84	0.44	0.65	0.13	8.3	1.1	3.12	0.34	40.5	2.7	16.8	1.3	83	5.5
nrr_NAV15_12_120	345	210.3	0.5743	0.0065	0.07438	0.00072	0.91257	0.05606	0.00024	-0.015898	460.7	4.2	462.5	4.3	454.5	9.4	1.00391	0.609565	462.5	4.3		4.8	1.5	861	59	1.81	0.28	0.0065	0.0059	22.9	2	0.144	0.04	2.7	0.49	4.07	0.6	1.61	0.21	18.1	2.3	6.11	0.59	66.9	5	26.6	2.1	129.3	8.6
nrr_NAV15_12_159	352	148	0.5727	0.0056	0.07441	0.00067	0.93104	0.05589	0.00023	-0.041796	459.7	3.6	462.7	4	447.8	9.3	1.00653	0.420455	462.7	4		4.5	1.5	650	19	3.38	0.39	0.0078	0.0052	23.4	1.2	0.042	0.017	0.78	0.23	1.79	0.32	0.79	0.19	10.3	1.2	3.73	0.28	46.3	3.2	20.4	1	102.8	5.4
nrr_NAV15_12_82	289	170.3	0.5794	0.0049	0.07445	0.0006	0.8497	0.05607	0.00027	0.10993	464.6	3.3	462.9	3.6	455	11	0.996341	0.589273	462.9	3.6		2.98	0.97	455	20	1.76	0.26	0.007	0.005	18.57	0.68	0.067	0.032	0.71	0.14	1.6	0.38	0.63	0.12	8.4	0.8	2.71	0.24	31.8	1.9	13.74	0.75	69.7	4.5
nrr_NAV15_12_173	478	192.1	0.5745	0.0054	0.07446	0.00059	0.93075	0.05611	0.00024	-0.011486	460.9	3.5	463	3.6	456.5	9.5	1.00456	0.401883	463	3.6		2.9	1.2	523	25	2.63	0.34	0.0062	0.0054	23.2	1.1	0.043	0.015	0.81	0.23	1.52	0.34	0.86	0.15	8.5	1.1	3.12	0.22	41.3	2.7	16.07	0.87	80.6	4
nrr_NAV15_12_30	397	228.5	0.573	0.0063	0.07447	0.00058	0.80095	0.05589	0.00034	-0.038639	459.9	4.1	463	3.5	448	13	1.00674	0.575567	463	3.5		4	1.3	397	13	1.74	0.19	0.0047	0.0043	23.15	0.75	0.036	0.013	0.84	0.26	1.78	0.31	0.65	0.12	8.7	1	2.7	0.2	31.5	1.5	12.2	0.56	59.5	2.8
nrr_NAV15_12_88	304	202.4	0.635	0.0071	0.07449	0.00072	0.87462	0.0617	0.00035	0.048015	499.1	4.4	463.2	4.3	665	12	0.928071	0.665789	463.2	4.3		2.59	0.93	697	33	1.29	0.23	0.024	0.01	19.8	1.6	0.25	0.047	3.47	0.5	4.43	0.56	1.95	0.27	18.7	1.7	5.35	0.48	58.8	4.4	22.4	1.4	105.4	7.4
nrr_NAV15_12_99	199.8	137.4	0.5766	0.0059	0.07452	0.00051	0.83682	0.05596	0.00027	-0.0726	462.2	3.8	463.3	3.1	453	11	1.00238	0.687688	463.3	3.1		10.7	1.5	1273	38	3.47	0.31	0.0065	0.0058	15.2	1.1	0.081	0.023	1.89	0.31	3.65	0.62	1.08	0.15	21.3	1.6	7.47	0.32	97.8	3.4	40.4	1.2	196.7	7.2
nrr_NAV15_12_117	90.9	89	0.5727	0.0079	0.07453	0.00068	0.7981	0.05557	0.00044	-0.031488	459.6	5.1	463.4	4.1	434	18	1.00827	0.979098	463.4	4.1		12.7	2.1	628	35	1.41	0.23	0.0133	0.0086	32	1.3	0.146	0.035	2.03	0.33	4.13	0.56	1.59	0.25	18.3	2	5.49	0.47	59.5	3.6	20.8	1.7	89.3	6.3
nrr_NAV15_12_92	472	139.73	0.5767	0.0056	0.07457	0.00067	0.88929	0.0562	0.00022	0.077041	462.3	3.6	463.6	4	460	8.6	1.00281	0.296038	463.6	4		2.6	1	375	22	1.86	0.16	0.0026	0.0035	20.45	0.78	0.073	0.024	1.01	0.25	1.77	0.43	0.45	0.11	7.48	0.93	2.69	0.27	30.4	2.5	11.49	0.86	57.5	3.4
nrr_NAV15_12_37	393	232.7	0.5783	0.0061	0.07459	0.00064	0.88108	0.05624	0.00029	-0.13305	464	4.1	463.7	3.8	462	11	0.999353	0.592112	463.7	3.8		3.1	1.2	366	12	1.95	0.28	0.0069	0.0047	25.3	1.1	0.027	0.01	0.69	0.23	1.3	0.32	0.67	0.12	7.55	0.86	2.59	0.33	28.8	1.7	11.2	0.76	55.1	3.1
nrr_NAV15_12_162	350	202.4	0.5781	0.0067	0.07459	0.00075	0.78452	0.05607	0.00033	0.053316	463.1	4.3	463.7	4.5	455	13	1.0013	0.578286	463.7	4.5		3.4	1.7	398.1	9.4	2.05	0.25	-0.0006791	1.1e-06	21.6	0.8	0.052	0.021	0.97	0.2	1.65	0.34	0.7	0.11	9.4	1.2	2.92	0.22	31.7	1.8	12.13	0.58	60.2	2.5
nrr_NAV15_12_2	265	129.8	0.5892	0.0066	0.07463	0.00059	0.768	0.05718	0.00038	-0.10947	471	4.4	464	3.6	498	15	0.985138	0.489811	464	3.6		3.8	1.3	368	15	1.51	0.18	0.98	0.55	25.6	4.4	0.55	0.31	3.1	1.3	1.61	0.41	0.52	0.09	7.6	1.1	2.42	0.25	27.9	2	11.7	0.71	58.5	2.5
nrr_NAV15_12_48	393	171.4	0.5772	0.0061	0.07463	0.00065	0.91952	0.05596	0.0002	-0.082537	462.6	3.9	464	3.9	452.3	8.3	1.00303	0.436132	464	3.9		3	1.1	683	26	3.57	0.36	0.0086	0.005	25.7	1.3	0.031	0.01	0.96	0.22	1.98	0.5	0.74	0.11	12.4	1.2	3.87	0.33	48.3	2.3	21.24	0.79	105.8	4.6
nrr_NAV15_12_73	113.4	88.31	0.5763	0.0074	0.07465	0.00074	0.73875	0.05618	0.00054	0.14213	462	4.8	464.1	4.4	462	21	1.00455	0.778748	464.1	4.4		8.6	1.1	450	13	0.92	0.21	0.0089	0.007	18.41	0.92	0.093	0.021	2.06	0.37	3.57	0.53	1.28	0.16	13.05	0.9	3.98	0.25	39.7	2.2	14.47	0.93	60	2.5
nrr_NAV15_12_125	212	115	0.58	0.01	0.0747	0.0012	0.94127	0.05627	0.00034	-0.090422	464.4	6.7	464.2	7.1	462	13	0.999569	0.542453	464.2	7.1		3.6	1.3	326	60	1.38	0.31	0.006	0.0068	15.1	2.4	0.058	0.025	0.32	0.15	1.29	0.44	0.45	0.14	6.1	1.1	1.83	0.43	23.8	4.6	9.3	1.7	44.8	8.4
nrr_NAV15_12_18	456	278.8	0.5785	0.0049	0.07466	0.00048	0.81594	0.05615	0.00027	0.13559	463.4	3.1	464.2	2.9	458	10	1.00173	0.611404	464.2	2.9		4.8	0.94	986	32	2.33	0.29	0.0107	0.007	26.5	1.4	0.126	0.02	2.94	0.45	4.3	0.45	2.04	0.2	23.5	2.2	7.6	0.66	81.2	3.4	32.5	1.6	146.2	5.4
nrr_NAV15_12_142	254.5	159.9	0.5996	0.008	0.07469	0.00075	0.71172	0.05784	0.00052	0.080867	476.9	5.1	464.4	4.5	526	20	0.973789	0.628291	464.4	4.5		5.2	1.2	368	19	1.38	0.21	0.0231	0.0085	18.7	1.3	0.12	0.054	1.01	0.24	1.37	0.37	0.62	0.15	6.17	0.77	2.29	0.26	27.5	1.3	10.93	0.75	55.2	4.7
nrr_NAV15_12_16	278	144.7	0.5801	0.0086	0.07471	0.00081	0.87815	0.05627	0.00041	-0.23673	464.4	5.5	464.4	4.9	465	16	1	0.520504	464.4	4.9		4.8	1.3	566	31	1.82	0.25	0.0138	0.0059	19.4	1.3	0.123	0.029	1.78	0.31	2.78	0.44	1.35	0.16	12.7	1.6	3.93	0.44	43.9	3.6	19.1	1.5	82.2	4.4
nrr_NAV15_12_160	418	213	0.5723	0.0053	0.07471	0.00087	0.92215	0.0561	0.00023	0.30839	460.1	3.2	464.5	5.2	455.9	9.2	1.00956	0.509569	464.5	5.2		4.4	1.1	633	21	3.25	0.32	0.014	0.009	25.36	0.97	0.069	0.02	1.43	0.3	1.94	0.45	0.95	0.14	10.8	1.1	4.02	0.26	50.8	2.7	20.9	0.95	97.4	4.7
nrr_NAV15_12_116	291	183	0.5719	0.0066	0.07472	0.00066	0.85767	0.05573	0.00033	-0.12442	459.2	4.3	464.5	3.9	441	13	1.01154	0.628866	464.5	3.9		4.5	1.2	657	27	2.44	0.27	0.0065	0.0063	27	1.1	0.05	0.02	0.93	0.23	1.87	0.44	0.69	0.15	11	1	3.9	0.32	46.5	2.8	19.91	0.89	105.2	4.3
nrr_NAV15_12_95	537	363.3	0.5921	0.0053	0.07467	0.00066	0.88679	0.05735	0.00025	0.19605	472.2	3.4	464.9	3.8	504.6	9.8	0.98454	0.676536	464.9	3.8		3.6	1.3	498	20	2.94	0.39	0.032	0.013	31.3	2	0.089	0.026	1.39	0.28	2.22	0.43	0.99	0.22	9.7	1.2	3.44	0.29	37.6	2.1	15.32	0.74	74.2	4.1
nrr_NAV15_12_127	352	207	0.577	0.013	0.0748	0.0016	0.97498	0.05603	0.00023	0.0094681	462.4	8.4	465	9.9	453.3	9.2	1.00562	0.588068	465	9.9		5.4	1.5	770	110	2.63	0.63	0.0071	0.0072	25.8	4.7	0.148	0.032	2.1	0.52	3.23	0.63	1.42	0.2	14.6	1.4	5.25	0.62	60.2	8.6	22.2	3.1	116	15
nrr_NAV15_12_115	124.3	111.21	0.576	0.0059	0.0748	0.00055	0.8309	0.05591	0.00034	-0.043435	461.8	3.8	465	3.3	448	14	1.00693	0.89469	465	3.3		11.3	2	591	18	2.04	0.21	0.0027	0.0045	41.8	2	0.108	0.027	2.2	0.32	3.47	0.59	1.1	0.11	16.8	1.8	5.05	0.32	55.5	2.9	18.55	0.53	85.3	2.9
nrr_NAV15_12_94	387	193.5	0.5797	0.0051	0.07486	0.00063	0.86775	0.05605	0.00027	0.16764	464.2	3.3	465.4	3.8	454	11	1.00259	0.5	465.4	3.8		3.07	0.8	663	42	3.02	0.43	0.0096	0.0059	25.6	1.6	0.05	0.015	0.86	0.22	1.77	0.32	0.91	0.17	11.9	1.1	4.01	0.36	46.9	3.5	20	1.6	99.1	8
nrr_NAV15_12_170	345	215.7	0.5854	0.0093	0.0749	0.0012	0.93959	0.05687	0.00033	0.058377	467.8	5.9	465.6	7	486	13	0.995297	0.625217	465.6	7		4.5	1.4	553	29	2.57	0.3	0.0144	0.008	24.9	1.5	0.069	0.019	1.18	0.37	2.32	0.33	1.19	0.22	12	1.3	4.01	0.43	46	3.6	16.6	1.2	82.9	4.8
nrr_NAV15_12_35	493	241	0.5811	0.0055	0.07491	0.0007	0.85142	0.05605	0.00026	0.19926	465.7	3.6	465.7	4.2	454	10	1	0.488844	465.7	4.2		3.3	1.6	795	56	3.61	0.53	0.012	0.006	27.4	3	0.042	0.017	1.07	0.2	2.29	0.39	1.09	0.19	12.7	1.7	4.88	0.52	58.8	5.8	24.8	1.8	126	12
nrr_NAV15_12_34	231	141.6	0.5736	0.0068	0.07492	0.00064	0.8225	0.05576	0.00033	-0.101	460.3	4.4	465.7	3.8	443	13	1.01173	0.612987	465.7	3.8		4.8	1.5	439	28	1.4	0.19	0.0052	0.0041	17.3	1.2	0.037	0.013	0.7	0.2	1.45	0.32	0.539	0.095	7	1	2.47	0.22	31.4	2.8	13.3	0.91	67.3	5.2
nrr_NAV15_12_27	335	161.6	0.5788	0.0053	0.07493	0.00076	0.83398	0.05603	0.00033	0.27492	463.7	3.4	465.8	4.5	453	13	1.00453	0.482388	465.8	4.5		3.4	1.2	540	28	2.83	0.3	0.0091	0.0068	24.2	1.9	0.041	0.02	0.81	0.2	1.62	0.22	0.69	0.11	9.3	1	3.08	0.22	38.4	2.5	15.71	0.94	80.3	4.1
nrr_NAV15_12_42	274.2	140.5	0.578	0.007	0.07495	0.0006	0.85154	0.05604	0.00029	-0.18777	463.1	4.5	465.9	3.6	453	11	1.00605	0.5124	465.9	3.6		2.5	1.1	273.8	7.5	1.31	0.16	0.0044	0.0046	15.6	0.81	0.0153	0.0084	0.59	0.22	1.17	0.26	0.414	0.096	5.71	0.99	1.89	0.24	21.5	1.5	8.35	0.36	40.2	1.5
nrr_NAV15_12_69	238	187.9	0.5803	0.004	0.07499	0.00051	0.77728	0.05607	0.00026	0.31448	464.6	2.6	466.1	3.1	455	10	1.00323	0.789496	466.1	3.1		3.01	0.81	686	27	1.74	0.26	0.0083	0.0053	24.1	1.1	0.228	0.032	3.88	0.51	5.49	0.56	2.38	0.25	22	2	6.46	0.38	63	3.4	21.4	1.2	96.6	5.8
nrr_NAV15_12_84	271.7	189.9	0.5799	0.0048	0.07498	0.00057	0.74763	0.05581	0.00032	0.23707	464.4	3	466.1	3.4	444	13	1.00366	0.698933	466.1	3.4		3.7	1.2	463	18	1.64	0.18	0.0066	0.006	20.71	0.93	0.069	0.024	0.72	0.16	1.44	0.31	0.623	0.086	7.4	1.2	2.61	0.22	34	1.8	14.4	0.64	72.7	3.2
nrr_NAV15_12_25	336	152.7	0.5789	0.0055	0.075	0.0007	0.85759	0.05582	0.00023	0.2194	463.7	3.5	466.2	4.2	444.9	9.2	1.00539	0.454464	466.2	4.2		3.8	1.2	474	20	2.01	0.26	0.0089	0.0046	18.92	0.81	0.035	0.017	0.88	0.23	1.84	0.35	0.69	0.12	8.4	1.1	3.05	0.28	35.6	2.5	15.08	0.71	74.4	3.1
nrr_NAV15_12_44	393	206.3	0.5823	0.0063	0.07502	0.00073	0.87427	0.05624	0.00027	0.07349	465.8	4	466.3	4.4	462	11	1.00107	0.524936	466.3	4.4		4.6	1.5	675	30	3.57	0.32	0.01	0.0048	27.5	1.6	0.053	0.012	1.33	0.28	2.48	0.38	0.98	0.13	11.7	1.3	4.18	0.27	47.1	2.8	20.3	1.2	99.4	6.5
nrr_NAV15_12_119	298	209.2	0.5753	0.0059	0.07505	0.0006	0.88869	0.0555	0.00025	-0.020214	461.4	3.8	466.5	3.6	432	10	1.01105	0.702013	466.5	3.6		3.2	1.6	666	27	1.4	0.15	0.0064	0.0067	21.5	1.1	0.097	0.033	1.51	0.21	2.54	0.41	1.17	0.17	13	1.2	4.3	0.36	48.2	3.2	19.6	1.1	102	4.2
nrr_NAV15_12_103	358	194.8	0.5842	0.0052	0.07507	0.00066	0.88968	0.05596	0.00024	0.21896	467.1	3.4	466.6	4	450.5	9.5	0.99893	0.544134	466.6	4		5.3	1.2	431	13	2.01	0.26	0.0082	0.0064	25.3	1	0.05	0.021	0.83	0.27	1.93	0.36	0.768	0.098	8	1	2.85	0.25	32.4	1.4	13.39	0.61	64	3.4
nrr_NAV15_12_163	329	166.5	0.5788	0.008	0.0751	0.001	0.93222	0.05605	0.00028	0.086659	463.5	5.2	466.6	6	454	11	1.00669	0.506079	466.6	6		2.91	0.85	535	23	1.73	0.27	0.011	0.0083	21.3	1.1	0.069	0.021	1.52	0.44	2.69	0.48	0.95	0.2	12	1.5	4.05	0.38	43.5	2.5	17.6	0.99	77.7	5.2
nrr_NAV15_12_118	261	173.9	0.5815	0.007	0.07514	0.00067	0.89045	0.05624	0.00032	-0.28225	466.1	4.7	467	4	461	13	1.00193	0.666284	467	4		3.4	1.3	547	24	1.45	0.27	-0.0001	0.0037	19.75	0.77	0.096	0.036	1.67	0.36	2.63	0.48	1.13	0.17	11.9	1.4	3.93	0.23	44.2	3.4	16.21	0.9	83.5	4.5
nrr_NAV15_12_136	248	145.9	0.5819	0.0086	0.07516	0.00092	0.9186	0.05617	0.00033	-0.24484	465.6	5.5	467.2	5.5	458	13	1.00344	0.588306	467.2	5.5		2.8	1.2	332	17	1.75	0.26	0.0005	0.0017	17.6	1	0.034	0.02	0.71	0.2	1.52	0.39	0.51	0.11	6.34	0.9	2.41	0.24	26.3	1	10.2	0.78	52.9	2.4
nrr_NAV15_12_98	362	248.2	0.5817	0.0052	0.07517	0.0006	0.91212	0.0562	0.00024	-0.070589	465.5	3.3	467.2	3.6	460.2	9.3	1.00365	0.685635	467.2	3.6		2.62	0.99	420	13	2.04	0.22	0.0031	0.0037	29.3	1.7	0.054	0.026	0.83	0.21	1.85	0.44	0.72	0.14	7.55	0.99	2.84	0.26	31	2	12.53	0.57	63.2	2.5
nrr_NAV15_12_154	242.6	113.6	0.583	0.0076	0.07523	0.00083	0.89589	0.05625	0.00029	-0.044021	466.3	4.9	467.5	5	462	11	1.00257	0.468261	467.5	5		3	1	447	19	1.83	0.32	0.0087	0.0068	18	1	0.035	0.016	0.67	0.19	1.44	0.4	0.62	0.14	8.1	0.79	2.67	0.24	32.8	2.1	14.44	0.69	69.6	3.5
nrr_NAV15_12_91	230	140.5	0.5996	0.007	0.07523	0.00067	0.76883	0.0577	0.00035	0.072373	476.9	4.4	467.6	4	518	13	0.980499	0.61087	467.6	4		2.3	1.2	522	23	1.12	0.18	0.0096	0.0069	16.39	0.95	0.11	0.028	1.67	0.36	2.58	0.49	1.01	0.14	11.8	1.3	3.74	0.25	41.2	2.6	15.97	0.79	75.2	3.3
nrr_NAV15_12_55	219.2	117.3	0.5867	0.0066	0.07523	0.00056	0.70664	0.05648	0.00046	0.013214	468.6	4.2	467.6	3.4	470	18	0.997866	0.535128	467.6	3.4		3.4	1.1	388	13	1.27	0.18	0.0053	0.003	16.7	0.95	0.047	0.019	0.74	0.22	1.16	0.27	0.519	0.092	6.63	0.91	2.25	0.25	29.1	1.5	11.64	0.55	59.8	3.4
nrr_NAV15_12_71	253.5	137.9	0.5809	0.0052	0.07523	0.00042	0.40734	0.05583	0.00039	0.097648	465	3.3	467.6	2.5	445	16	1.00559	0.543984	467.6	2.5		2.5	1.1	321	16	1.28	0.2	0.0104	0.0073	15.2	0.55	0.045	0.016	0.77	0.2	1.28	0.31	0.523	0.097	5.99	0.85	2.17	0.16	24.8	1.6	10.07	0.58	48.1	2.6
nrr_NAV15_12_139	291	104	0.6021	0.006	0.07527	0.00073	0.85896	0.05805	0.00037	0.24674	479.4	4.1	467.8	4.4	531	14	0.975803	0.357388	467.8	4.4		2.8	1.4	511	43	2.44	0.27	0.024	0.012	17.7	1.4	0.084	0.032	0.85	0.24	1.78	0.46	0.66	0.11	7.49	0.92	3.16	0.38	37.9	3.7	15.9	1.5	80.3	7.9
nrr_NAV15_12_157	571	302	0.5965	0.0087	0.0753	0.001	0.96421	0.05757	0.00022	0.12123	474.8	5.6	468	6.2	515.1	8	0.985678	0.528897	468	6.2		3.2	1.4	1080	84	2.86	0.44	0.055	0.019	31.9	2.2	0.37	0.063	4.89	0.83	6.09	0.72	2.5	0.24	22.8	2.2	7.8	0.69	88.7	5.6	34.4	3.4	156	10
nrr_NAV15_12_130	325	200.7	0.5881	0.0075	0.07531	0.00085	0.91442	0.05632	0.00023	0.016409	469.5	4.8	468	5.1	464.9	8.9	0.996805	0.617538	468	5.1		3	1.5	413	15	2.08	0.18	0.0106	0.0062	26.8	1.6	0.084	0.051	1.1	0.3	1.94	0.25	0.8	0.15	8.1	1.1	2.86	0.26	32.7	1.7	12.43	0.47	61.1	3.1
nrr_NAV15_12_93	196	167.7	0.5829	0.0072	0.07532	0.00065	0.86183	0.05623	0.00036	0.015056	466.2	4.6	468.1	3.9	461	14	1.00408	0.855612	468.1	3.9		7.5	1.4	1542	47	1.76	0.3	0.0175	0.0086	13.44	0.87	0.326	0.065	4.59	0.46	8.11	0.89	2.31	0.22	38.2	2.3	13.22	0.87	140.9	6.4	52.5	2.4	227.4	6
nrr_NAV15_12_40	447	294.8	0.5811	0.005	0.07532	0.00065	0.87038	0.0559	0.00023	0.29828	465.1	3.2	468.1	3.9	448.2	9.3	1.00645	0.659508	468.1	3.9		3.6	1	621	19	2.97	0.34	0.0134	0.0073	30	1.2	0.055	0.019	1.17	0.17	2.22	0.43	0.81	0.12	11	1.4	3.84	0.28	47	2.2	19.71	0.73	89.5	3.6
nrr_NAV15_12_54	394	212	0.5805	0.0058	0.07541	0.00079	0.93375	0.05571	0.00022	0.083667	464.7	3.7	468.7	4.7	440.6	8.7	1.00861	0.538071	468.7	4.7		2.59	0.97	529	43	2.47	0.38	0.031	0.046	27.1	1.2	0.066	0.029	0.95	0.23	1.65	0.3	0.77	0.16	10	1.4	3.19	0.34	39.3	4.6	15	1.1	76	6.7
nrr_NAV15_12_41	555	299.2	0.5847	0.0052	0.07544	0.00072	0.90855	0.05606	0.00022	0.1091	467.4	3.3	468.8	4.3	454.6	8.6	1.003	0.539099	468.8	4.3		5.14	0.96	1020	32	6.17	0.45	0.0028	0.0026	39	1.1	0.031	0.013	1.4	0.32	2.33	0.48	1.11	0.18	15.4	1.3	5.87	0.35	75.6	3.9	31.2	1.3	160.9	5.5
nrr_NAV15_12_123	261	174	0.5849	0.0053	0.07552	0.00066	0.85318	0.05647	0.00032	0.14006	467.5	3.4	469.3	4	470	12	1.00385	0.666667	469.3	4		3	1.2	594	23	1.45	0.21	0.0115	0.0085	20.29	0.9	0.158	0.041	1.98	0.29	3.41	0.53	1.24	0.14	13.29	0.94	4.42	0.32	47.3	2	18.3	0.73	85.9	4
nrr_NAV15_12_102	285	145.1	0.5946	0.0062	0.07553	0.0007	0.89425	0.05704	0.00028	-0.0077042	473.7	3.9	469.4	4.2	494	11	0.990923	0.509123	469.4	4.2		3.7	1.1	437	15	2.01	0.28	13.2	1.3	91.3	8.4	7.48	0.73	26.2	2.7	5.24	0.68	1.39	0.19	9.6	1.2	2.96	0.31	32.5	1.9	12.69	0.6	63.9	2.8
nrr_NAV15_12_59	618	254.4	0.5873	0.0051	0.07555	0.00061	0.89204	0.0561	0.00018	0.18038	469.7	3.1	469.5	3.7	456.1	7.2	0.999574	0.41165	469.5	3.7		3.3	1.2	850	47	5.21	0.52	0.0114	0.0049	33.8	1.3	0.053	0.026	0.82	0.22	2.25	0.58	0.97	0.11	14.5	1.5	4.91	0.5	61.8	3.2	24.8	1.4	125	5.5
nrr_NAV15_12_167	448	222.3	0.5912	0.0082	0.0756	0.0011	0.95174	0.05703	0.00026	0.20433	471.5	5.3	469.6	6.7	492.2	9.9	0.99597	0.496205	469.6	6.7		4.4	1.5	657	31	3.02	0.34	0.131	0.029	28.8	1.4	0.444	0.065	4.31	0.67	3.97	0.69	2.19	0.23	13.9	1.7	5.07	0.33	58	5.7	20.6	1.4	95.2	5.4
nrr_NAV15_12_122	405	247.1	0.5863	0.0075	0.07561	0.0009	0.93222	0.05598	0.00023	0.016908	468.4	4.8	469.9	5.4	453	9.5	1.0032	0.610123	469.9	5.4		2.9	1.1	515	24	1.98	0.26	0	0.0026	24	0.91	0.043	0.016	0.98	0.24	1.73	0.37	0.84	0.11	8.84	0.96	3.11	0.28	37.8	3	15.55	0.68	77.9	3.4
nrr_NAV15_12_108	494	338.6	0.633	0.01	0.07563	0.00052	0.66847	0.06021	0.00058	-0.30266	497.9	6.4	470	3.1	616	23	0.943965	0.685425	470	3.1		4.7	1.5	707	37	2.85	0.23	0.116	0.035	32.7	1.3	0.86	0.26	5.9	1.3	4.9	1.1	2.34	0.44	15.6	1.6	5.24	0.34	59.5	3.7	21.7	1.1	100.3	4.3
nrr_NAV15_12_65	312	233.1	0.5805	0.0054	0.07566	0.00066	0.88095	0.05561	0.00026	0.15486	464.8	3.5	470.2	4	437	11	1.01162	0.747115	470.2	4		3.9	1.1	982	37	1.97	0.21	0.0167	0.0076	28.7	1.4	0.099	0.028	2.64	0.29	3.66	0.54	1.43	0.17	20.2	2	6.36	0.4	76.3	4.4	30	1.2	150.4	4.7
nrr_NAV15_12_133	230	155	0.5891	0.0098	0.0757	0.0013	0.96194	0.05596	0.00026	0.11674	470.1	6.3	470.3	7.6	452	11	1.00043	0.673913	470.3	7.6		5	1.3	1380	120	1.29	0.28	0.028	0.013	25.1	3.9	0.389	0.077	5.66	0.66	9.4	1	3.52	0.3	40.7	4.4	11.8	1.4	125	12	47.6	4.6	210	19
nrr_NAV15_12_68	393	241.9	0.5859	0.0062	0.0757	0.00064	0.87517	0.05601	0.00031	-0.050529	468.2	4	470.4	3.9	454	12	1.0047	0.615522	470.4	3.9		5	1.4	1421	61	3.65	0.44	0.003	0.0035	35.4	1.7	0.084	0.028	1.57	0.29	4.17	0.47	1.54	0.21	24.4	1.9	8.83	0.53	110.2	4.4	44.1	2.2	208.2	8
nrr_NAV15_12_87	213	116.1	0.5866	0.007	0.07576	0.00077	0.85154	0.05607	0.00026	0.093074	468.6	4.5	470.7	4.6	455	10	1.00448	0.54507	470.7	4.6		2.7	1.1	382	31	1.32	0.15	0.0052	0.0043	14.8	1.2	0.043	0.013	0.78	0.25	1.34	0.41	0.62	0.11	7.31	0.95	2.46	0.33	28	2.7	11.65	0.92	59	5.6
nrr_NAV15_12_64	89.2	33.8	0.5869	0.0086	0.07581	0.00069	0.61212	0.05579	0.00063	0.1031	468.7	5.5	471	4.1	447	24	1.00491	0.378924	471	4.1		5.15	0.96	372	16	0.68	0.12	0.0034	0.004	6.47	0.43	0.034	0.016	0.52	0.19	1	0.22	0.52	0.11	6.16	0.69	2.06	0.22	27.1	2	11.5	0.72	58	2.8
nrr_NAV15_12_110	498	371	0.5949	0.0091	0.0758	0.001	0.93908	0.05671	0.0003	-0.14435	473.9	5.8	471.1	6.1	480	12	0.994092	0.74498	471.1	6.1		25	5.7	538	35	2.59	0.33	1.4	0.32	35.5	4.4	1.26	0.54	6.2	2.1	4.6	1.8	1.54	0.41	12	1.7	3.91	0.54	45.7	5.3	16.8	1.9	80	4.2
nrr_NAV15_12_100	385	247.6	0.588	0.005	0.07593	0.00063	0.86075	0.05614	0.00024	0.34254	469.5	3.2	471.7	3.8	457.8	9.3	1.00469	0.643117	471.7	3.8		3.8	1.2	455	18	2.2	0.29	0.0064	0.0049	29.2	1.6	0.064	0.02	0.96	0.19	1.73	0.29	0.82	0.15	9.1	1.3	3.11	0.3	36.1	2.1	13.87	0.9	67.7	4.4
nrr_NAV15_12_80	232	116.3	0.5851	0.0049	0.07592	0.00055	0.77645	0.05597	0.00027	0.29742	467.7	3.2	471.7	3.3	451	11	1.00855	0.501293	471.7	3.3		1.48	0.7	276	12	1.27	0.23	0.0037	0.0036	15.78	0.63	0.022	0.011	0.337	0.095	0.86	0.23	0.308	0.089	4.71	0.56	1.63	0.19	20.2	1.2	8.23	0.56	40.5	1.7
nrr_NAV15_12_106	399	221.8	0.5883	0.0088	0.0759	0.001	0.58683	0.05643	0.00034	-0.12012	469.6	5.7	471.8	6.2	469	13	1.00468	0.55589	471.8	6.2		4.9	1.4	497	45	1.79	0.22	0.138	0.047	24	1.8	0.73	0.19	5.3	1.1	3.78	0.74	2.21	0.47	10.9	1.8	3.9	0.46	41.3	4.9	14.4	1	69.7	6.1
nrr_NAV15_12_53	302.3	165.7	0.5876	0.0059	0.07599	0.00067	0.89869	0.05625	0.00025	0.16405	470	3.6	472.1	4	461.8	9.8	1.00447	0.548131	472.1	4		3.2	1.2	325	12	1.68	0.18	0.0099	0.0059	24.07	0.91	0.028	0.015	0.56	0.19	1.08	0.29	0.46	0.1	6.9	1	2.24	0.23	26.9	1.9	9.92	0.6	48.8	2.2
nrr_NAV15_12_67	491	277.5	0.6204	0.0061	0.07609	0.00069	0.94525	0.05904	0.00021	-0.10485	490.1	3.8	472.7	4.1	568.4	7.7	0.964497	0.565173	472.7	4.1		3.14	0.84	954	24	4.32	0.28	0.033	0.011	32.9	1.4	0.196	0.043	2.38	0.44	3.46	0.54	1.56	0.23	15.8	1.4	5.75	0.4	70.3	4.9	28.8	1.3	141.2	4.5
nrr_NAV15_12_90	474	341	0.624	0.0081	0.07614	0.00091	-0.13976	0.0598	0.0012	0.71819	492.2	5.1	473	5.4	591	44	0.960991	0.719409	473	5.4		4.3	1.3	795	65	3.78	0.51	0.099	0.07	37.4	4.3	0.63	0.37	5.3	2.8	3.7	1.2	2.04	0.81	17.2	3.1	5.22	0.78	61.5	7.1	23.2	2.3	119.2	8.2
nrr_NAV15_12_146	218	84.5	0.605	0.016	0.0762	0.0019	0.96128	0.05744	0.00039	0.022064	480.1	9.8	473	11	511	14	0.985211	0.387615	473	11		5.5	1.6	454	46	1.24	0.21	0.0087	0.0053	13.5	1.6	0.045	0.019	0.87	0.2	1.47	0.44	0.74	0.1	7.7	1.5	3.05	0.43	36.3	3.9	14	1.5	71.5	8.6
nrr_NAV15_12_33	391	248.3	0.5902	0.0055	0.07613	0.00057	0.84357	0.05628	0.00024	0.13324	470.9	3.5	473	3.4	463.1	9.5	1.00446	0.635038	473	3.4		6.7	1.7	753	27	2.98	0.42	0.0062	0.0031	24.95	0.75	0.081	0.024	1.56	0.32	2.74	0.34	1.16	0.14	15.3	1.5	4.98	0.34	56	3.1	23.9	1.3	117.3	4.9
nrr_NAV15_12_77	249	322.1	0.591	0.0053	0.07617	0.00053	0.77077	0.05631	0.00035	0.0049511	471.5	3.4	473.2	3.2	464	14	1.00361	1.29357	473.2	3.2		9.3	1.8	1460	49	2.14	0.24	0.0057	0.0046	50.9	2.6	0.492	0.058	9.59	0.97	14	1.1	3.38	0.32	51.2	3.6	14.68	0.83	148.1	6.9	48.9	2.6	197	10
nrr_NAV15_12_61	332	168	0.5869	0.007	0.07626	0.00084	0.90858	0.05581	0.00027	-0.061754	468.8	4.5	473.7	5	444	11	1.01045	0.506024	473.7	5		2.6	1.3	631	64	1.79	0.23	0.002	0.0025	21.5	2	0.049	0.014	1.15	0.28	2.48	0.25	1.13	0.19	13.7	2.4	4.07	0.46	49.4	5.4	19.8	2.1	95	8.5
nrr_NAV15_12_20	307	198.6	0.5978	0.0057	0.07627	0.00067	0.88975	0.0568	0.00025	0.021433	475.7	3.7	473.8	4	483.5	9.8	0.996006	0.646906	473.8	4		3.4	1.2	523	35	1.7	0.24	0.151	0.092	21.9	1.4	0.168	0.035	1.95	0.25	3.53	0.41	1.11	0.17	12.2	1.1	3.75	0.36	42	2.5	16.2	1.7	73.9	6.1
nrr_NAV15_12_58	460	334.1	0.5974	0.0065	0.07627	0.00077	0.92368	0.05661	0.00025	0.15999	475.5	4.1	473.8	4.6	478	10	0.996425	0.726304	473.8	4.6		4.72	0.96	573	23	2.79	0.25	3.5	0.36	49.7	2.8	1.59	0.15	9.1	1.2	3.12	0.51	0.95	0.16	12.9	1	4.02	0.37	44.6	2.4	18	0.81	82.8	4
nrr_NAV15_12_51	456	272.9	0.5913	0.0058	0.0763	0.00066	0.88249	0.05594	0.00024	0.079366	471.6	3.7	474	4	449.7	9.4	1.00509	0.598465	474	4		2.35	0.87	635	19	3.45	0.27	0.0053	0.0045	39.2	1.8	0.039	0.013	1.17	0.2	2.23	0.35	0.74	0.14	12.2	1.2	3.98	0.34	47.1	2.1	19.13	0.75	95.9	3.7
nrr_NAV15_12_60	348	212.2	0.6324	0.0068	0.07638	0.00059	0.78728	0.05989	0.00037	0.082527	497.5	4.2	474.4	3.5	599	13	0.953568	0.60977	474.4	3.5		5	1.7	656	25	2	0.18	0.109	0.022	28.6	1.1	0.347	0.059	3.66	0.45	3.31	0.56	1.3	0.16	11.3	1.2	4.05	0.28	50.1	3.7	19.08	0.84	100.5	5.7
nrr_NAV15_12_6	533	251.7	0.5984	0.0041	0.07636	0.00041	0.36359	0.05663	0.00035	0.43088	476.2	2.6	474.4	2.5	480	13	0.99622	0.472233	474.4	2.5		3.6	1.3	778	52	4.08	0.49	0.0069	0.006	34.7	1.9	0.046	0.022	0.88	0.24	2.09	0.44	0.9	0.14	13	1.1	4.73	0.38	59	4.2	24.3	1.4	120.6	7.9
nrr_NAV15_12_47	383	187.2	0.5927	0.0057	0.07637	0.00062	0.90047	0.05625	0.00027	-0.039335	472.6	3.6	474.4	3.7	464	11	1.00381	0.488773	474.4	3.7		3.7	1.2	614	23	2.87	0.3	0.0091	0.0052	22.7	1.1	0.053	0.024	1.07	0.19	1.98	0.33	0.74	0.15	10.1	1	3.68	0.24	43.5	2.1	17.74	0.89	92.3	4.2
nrr_NAV15_12_46	279	136.9	0.5984	0.0056	0.07638	0.00066	0.91369	0.05669	0.00027	-0.27562	477	3.8	474.5	4	479	11	0.994759	0.490681	474.5	4		4.2	1.4	489	16	1.95	0.22	6.4	5.5	54	31	2.7	2.2	14	11	3.7	1.5	1	0.22	11.2	1.5	3.3	0.28	37.1	2.3	15.25	0.63	73.6	3.2
nrr_NAV15_12_156	542	375	0.5911	0.0074	0.07623	0.0009	0.92364	0.05608	0.00025	0.16484	471.5	4.7	474.5	5.6	459	11	1.00636	0.691882	474.5	5.6		4.7	1.7	593	22	3.39	0.35	0.0113	0.0081	31.4	1.5	0.047	0.013	1.03	0.26	2.34	0.35	0.88	0.13	13.1	1.5	4.57	0.43	48.9	1.9	19.2	0.73	88.5	4
nrr_NAV15_12_109	219	104.59	0.5923	0.0062	0.07641	0.00088	0.8236	0.05606	0.00034	0.41964	472.3	4	474.6	5.3	457	13	1.00487	0.47758	474.6	5.3		2.29	0.95	333	14	1.59	0.23	0.0005	0.0024	14.82	0.68	0.053	0.02	0.68	0.18	0.73	0.19	0.53	0.11	6.1	1	2.16	0.28	25.2	1.8	9.77	0.67	51	3
nrr_NAV15_12_105	417	211.8	0.5968	0.0058	0.07646	0.00079	0.90765	0.05644	0.00027	0.24104	475.1	3.7	474.9	4.7	469	10	0.999579	0.507914	474.9	4.7		3.7	1.5	689	26	3.5	0.35	5.5	2.3	54	13	2.8	1.2	11	4.2	3.58	0.83	1.3	0.26	12.5	1.3	3.9	0.3	49.9	3.2	21.5	1.1	105.2	5.5
nrr_NAV15_12_62	447	305.3	0.6088	0.0079	0.0765	0.001	0.90362	0.05732	0.0003	0.28694	482.7	5	475	6.2	503	11	0.984048	0.682998	475	6.2		4.04	0.83	721	38	3.25	0.52	0.031	0.012	34.4	2.6	0.19	0.032	2.19	0.37	3.38	0.47	2.05	0.27	14.5	1.5	4.44	0.4	57.2	4.6	22.3	1.1	107.8	6.8
nrr_NAV15_12_56	349	151.8	0.5912	0.0066	0.0765	0.00069	0.89952	0.05614	0.00026	-0.048699	471.5	4.2	475.2	4.1	458	10	1.00785	0.434957	475.2	4.1		3.1	1.4	357	21	1.74	0.23	0.0099	0.0063	20.2	1.7	0.0128	0.008	0.56	0.22	1.15	0.29	0.54	0.1	6.5	1.3	2.15	0.27	26.2	2.2	11.25	0.92	53.6	3
nrr_NAV15_12_66	250	145	0.5897	0.0092	0.0766	0.0012	0.916	0.05607	0.00036	0.22873	470.5	5.9	475.6	7.1	454	14	1.01084	0.58	475.6	7.1		2.93	0.76	517	83	1.52	0.2	0.03	0.026	19.2	3.5	0.2	0.16	2.3	1.1	2.92	0.95	1.53	0.8	13	2.8	3.89	0.84	40.5	7.5	15.5	3	74	11
nrr_NAV15_12_107	299	135.39	0.6047	0.0079	0.07658	0.00079	0.83125	0.05729	0.00045	-0.0028856	480.1	5	475.7	4.7	502	17	0.990835	0.452809	475.7	4.7		3.7	1.2	584	17	2.51	0.19	0.0088	0.0071	20.1	1	0.079	0.03	1.24	0.17	1.81	0.36	0.81	0.13	10.01	0.88	3.35	0.2	41.5	1.9	16.54	0.81	84.5	3.5
nrr_NAV15_12_104	465	288.2	0.6135	0.0058	0.07661	0.00069	0.7111	0.05789	0.00047	0.14488	485.7	3.7	475.8	4.1	528	17	0.979617	0.619785	475.8	4.1		4.7	1.7	639	27	3.36	0.29	0.0106	0.0065	33.1	1.6	0.082	0.031	1.2	0.23	2.64	0.42	1.08	0.18	12.7	1.8	3.81	0.24	44.9	2.1	18.18	0.96	91.6	3.5
nrr_NAV15_12_79	355	143.5	0.5937	0.0075	0.07664	0.00074	0.91764	0.05617	0.00028	-0.28767	473.1	4.8	476	4.4	459	11	1.00613	0.404225	476	4.4		2.4	1.1	598	33	2.01	0.31	0.0031	0.0036	18.79	0.87	0.038	0.018	0.6	0.15	1.73	0.39	0.75	0.11	10.2	1	3.41	0.27	43.2	2.6	18.9	1.2	93.5	5.4
nrr_NAV15_12_101	367	181.1	0.6145	0.0066	0.07666	0.0007	0.82805	0.05851	0.0004	0.038493	486.3	4.2	476.2	4.2	548	15	0.979231	0.49346	476.2	4.2		3.1	1.1	629	17	2.61	0.21	0.0122	0.0054	23.2	0.83	0.141	0.039	1.64	0.28	2.04	0.38	0.95	0.16	11.4	1	3.78	0.24	46.5	2.4	19.31	0.67	97.4	2.2
nrr_NAV15_12_43	301	156.1	0.5946	0.0055	0.07668	0.00069	0.84817	0.05614	0.0003	0.020638	473.7	3.5	476.3	4.1	457	12	1.00549	0.518605	476.3	4.1		3.4	1.5	307	11	1.28	0.17	0.0015	0.0021	16.83	0.74	0.034	0.011	0.6	0.16	1.13	0.27	0.51	0.14	5.43	0.77	2.01	0.2	23.5	1.3	9.59	0.44	45.4	2.4
nrr_NAV15_12_85	369	214	0.5938	0.0063	0.07673	0.00071	0.89782	0.05613	0.00027	-0.083638	473.2	4	476.6	4.2	457	11	1.00719	0.579946	476.6	4.2		2.3	0.93	709	59	1.58	0.2	0.0078	0.0049	22.2	1.7	0.192	0.046	2.79	0.59	3.51	0.51	1.72	0.16	17.5	2.1	5.58	0.33	59	6.7	23.2	1.7	107.7	7
nrr_NAV15_12_113	314	187	0.6063	0.0097	0.0768	0.0011	0.93871	0.0571	0.00029	-0.06289	481	6.1	477.2	6.7	495	11	0.9921	0.595541	477.2	6.7		4.7	1.3	712	49	1.63	0.16	0.0276	0.0095	20.1	1.8	0.252	0.058	2.96	0.39	3.99	0.53	1.92	0.2	17.5	1.6	5.88	0.38	58.4	4.5	21.6	1.7	101.5	6.4
nrr_NAV15_12_78	980	542	0.598	0.017	0.077	0.002	0.99476	0.05627	0.00017	-0.19738	475	11	478	12	463.1	6.7	1.00632	0.553061	478	12		2.7	1.1	1114	44	7.11	0.7	0.186	0.095	49.2	3.9	0.97	0.48	6.9	3.2	5.5	1.4	2.67	0.89	21.5	3.6	7.77	0.79	89.5	7.1	35.4	2.6	171	10
nrr_NAV15_12_15	128.8	51.56	0.5951	0.0067	0.0771	0.00058	0.76373	0.0559	0.00039	-0.076855	474	4.3	478.8	3.5	448	16	1.01013	0.400311	478.8	3.5		2.4	1.2	188.7	4.7	0.96	0.13	0.0025	0.0025	10.04	0.6	0.019	0.013	0.35	0.1	0.38	0.15	0.224	0.071	2.79	0.45	1.33	0.11	14	1.1	6.24	0.4	29.9	1.2
nrr_NAV15_12_76	251	147.8	0.5964	0.0066	0.07721	0.00071	0.83808	0.05605	0.0003	0.11007	474.9	4.2	479.4	4.3	454	12	1.00948	0.588845	479.4	4.3		4	1.4	532	33	1.5	0.2	0.0071	0.0058	16	1.1	0.07	0.026	1.48	0.37	2.56	0.49	0.9	0.13	10.4	1	3.72	0.45	41.7	4.2	16.7	1.3	79.7	6.7
nrr_NAV15_12_39	348.1	200.4	0.5963	0.0066	0.07726	0.00067	0.88228	0.05599	0.00029	-0.0083984	474.8	4.2	479.7	4	452	12	1.01032	0.575697	479.7	4		3.8	1.5	498	17	2.22	0.26	0.0025	0.0032	20.67	0.86	0.046	0.018	0.96	0.2	1.95	0.41	0.815	0.096	9.25	0.96	2.99	0.27	36.2	1.2	15.52	0.93	73.8	1.5
nrr_NAV15_12_72	384	252.9	0.6044	0.0044	0.0773	0.00065	0.67111	0.05674	0.00036	0.47273	480	2.8	480	3.9	481	14	1	0.658594	480	3.9		3.6	1.2	528	18	2.55	0.28	0.0097	0.0055	24	1.3	0.099	0.035	1.34	0.31	2.06	0.42	0.89	0.1	10.8	1.1	3.29	0.3	40.8	2.4	16.32	0.69	76.9	2.9
nrr_NAV15_12_63	403	220	0.6021	0.0069	0.07757	0.00074	0.8874	0.05626	0.00028	0.016029	478.5	4.4	481.6	4.4	462	11	1.00648	0.545906	481.6	4.4		4	1.7	558	19	2.66	0.31	0.0137	0.0069	23.5	1.3	0.043	0.018	0.96	0.23	1.87	0.41	0.85	0.16	9.18	0.85	3.42	0.23	42.7	2.6	16.35	0.73	80.8	3.3
nrr_NAV15_12_52	407	210.8	0.5991	0.0059	0.07777	0.00079	0.88844	0.05599	0.00029	0.3753	476.6	3.7	482.8	4.7	451	12	1.01301	0.517936	482.8	4.7		4	1.1	752	38	3.37	0.36	0.0049	0.0037	25.7	1.4	0.054	0.015	1.25	0.39	2.29	0.45	1.15	0.24	13.02	0.84	4.56	0.33	57	2.9	23.2	1.2	112.4	5
nrr_NAV15_12_166	283.4	116.8	0.6033	0.0074	0.07808	0.00094	0.84299	0.05601	0.00032	0.23527	479.2	4.7	484.6	5.6	453	13	1.01127	0.412138	484.6	5.6		3.1	1.3	416	15	2.21	0.22	0.0069	0.0051	16.7	1.1	0.031	0.014	0.69	0.24	1.06	0.31	0.62	0.12	6.45	0.86	2.6	0.22	30.4	1.3	13.5	0.8	62.3	3.4
nrr_NAV15_12_81	490	193	0.622	0.039	0.0812	0.0052	0.9955	0.05608	0.0003	0.30365	496	24	503	31	455	12	1.01411	0.393878	503	31		3.2	1.5	820	270	5.1	2.1	0.0214	0.0082	39	15	0.134	0.043	1.47	0.53	2.1	0.7	1.14	0.3	12.8	4	4.3	1.4	57	19	24.7	7.9	125	43
nrr_NAV15_12_126	96	28	1.718	0.018	0.1716	0.0016	0.79834	0.07305	0.0004	0.19761	1016.4	6.9	1021.1	9.1	1015	11	1.00601	0.291667	1015	11		9.1	2	550	20	4.41	0.34	0.0037	0.0048	9.29	0.64	0.096	0.031	1.25	0.21	2.8	0.4	0.194	0.076	15.21	0.72	4.82	0.42	52.2	3.2	18.74	0.73	80.6	3.7
nrr_NAV15_12_45	72.8	26.17	1.823	0.017	0.1791	0.0013	0.67691	0.07383	0.00042	0.14974	1053.7	6	1061.9	7.2	1036	12	1.025	0.359478	1036	12		21.2	2.6	517	22	1.24	0.19	0.0099	0.0048	6.8	0.49	0.072	0.02	2.04	0.33	3.05	0.52	0.41	0.11	14	1.1	4.65	0.39	49.4	1.7	17.28	0.68	71.5	2.9
nrr_NAV15_12_7	60.1	12.48	1.714	0.018	0.1686	0.0013	0.74496	0.07395	0.00052	0.067732	1014.6	6.9	1004.3	7.2	1040	14	0.965673	0.207654	1040	14		10.9	1.8	321.3	8.2	0.88	0.13	0.0074	0.0042	3.04	0.35	0.043	0.015	0.7	0.2	1.41	0.23	0.285	0.072	6.9	1.1	2.54	0.27	28.7	1.6	10.56	0.7	49.9	3.2
nrr_NAV15_12_143	498	25.6	1.814	0.019	0.177	0.0018	0.97491	0.0744	0.00016	-0.11543	1051.6	7.1	1050.3	9.8	1052.4	4.3	0.998005	0.0514056	1052.4	4.3		4.5	1.3	2466	75	14.72	0.48	0.0075	0.0054	5.48	0.32	0.04	0.013	0.56	0.19	2.14	0.33	0.125	0.063	22.3	1.9	12.11	0.33	184.4	6.6	78.3	2.1	373	12
nrr_NAV15_12_13	199.6	116.6	1.851	0.019	0.1776	0.0015	0.90947	0.07561	0.00031	-0.031362	1063.5	6.6	1054	8.3	1084.6	8.3	0.971787	0.584168	1084.6	8.3		9	1.9	858	33	5.56	0.52	0.0021	0.0031	40.9	1.8	0.03	0.013	0.88	0.2	2.23	0.46	0.42	0.12	13.5	1	5.35	0.32	68.3	2.7	27.6	1.1	143.9	5.9
nrr_NAV15_12_5	42.2	25.7	1.875	0.021	0.1796	0.0012	0.81089	0.07563	0.00055	-0.030754	1071.9	7.4	1065	6.6	1087	14	0.979761	0.609005	1087	14		14.3	2	488	22	1.77	0.19	0.059	0.025	13.27	0.97	0.069	0.019	1.05	0.32	1.91	0.37	0.69	0.13	10.8	1.3	3.91	0.28	47.6	3	16.44	0.92	75.9	3.6
nrr_NAV15_12_144	105.7	26.86	2.151	0.019	0.197	0.0016	0.83204	0.07882	0.00033	0.12757	1165.2	6.3	1159.4	8.5	1167.5	8.2	0.993062	0.254115	1167.5	8.2		4.6	1.4	1358	30	1.99	0.27	0.053	0.039	6.88	0.51	0.124	0.032	2.9	0.36	5.53	0.62	0.399	0.085	35.1	2.3	11.25	0.64	127	4.7	46.5	1.3	201.4	6.3
nrr_NAV15_12_89	191.9	116.6	2.243	0.02	0.2043	0.0015	0.92621	0.07958	0.00029	-0.17891	1194.4	6.2	1198.5	7.8	1186.5	7.1	1.01011	0.607608	1186.5	7.1		11	1.9	1486	32	2.24	0.25	0.0096	0.0062	9.04	0.64	0.149	0.027	3.21	0.39	6.48	0.78	0.53	0.11	35.6	2.5	12.88	0.77	141	6.2	51	1.8	218.8	8
lead loss likely
nrr_NAV15_12_9	730	514	0.508	0.011	0.0623	0.0016	0.97865	0.05915	0.00037	0.59701	416.8	7.2	389.6	9.6	572	14	0.934741	0.70411	389.6	9.6		13.1	2.9	1850	310	4.66	0.91	1.22	0.39	63	12	3.44	0.96	29	7.5	22.4	5.7	12.4	2.9	56	12	18.8	4.1	187	36	61	11	256	48
nrr_NAV15_12_131	554	313	0.5985	0.0061	0.06958	0.00071	0.7248	0.06221	0.00055	0.31118	476.2	3.9	433.6	4.3	683	20	0.910542	0.564982	433.6	4.3		6.4	1.8	861	37	3.47	0.36	1.04	0.15	49.6	2.4	2.81	0.4	19.4	2.5	11.2	1.4	4.93	0.47	23	2.1	7.17	0.54	78	5.2	26.9	1.2	119.6	5.2
nrr_NAV15_12_57	380	255.5	0.5474	0.0049	0.06973	0.00058	0.81377	0.05687	0.00028	0.24287	443.2	3.2	434.5	3.5	486	11	0.98037	0.672368	434.5	3.5		7.8	1.3	874	40	3.08	0.34	0.66	0.11	42.9	2.9	2.96	0.46	26.3	3.3	16.2	2.1	7	0.83	26.8	3.6	8.66	0.81	87.7	5.5	29	1.6	123.9	4.5
discordant
nrr_NAV15_12_32	268	169	1.977	0.027	0.0868	0.001	0.85112	0.1643	0.0018	-0.26157	1107.3	9.3	536.4	6.1	2499	18	0.484422	0.630597	536.4	6.1		4.4	1.1	616	48	1.45	0.19	0.063	0.025	18.5	1.7	0.193	0.051	3.62	0.93	4.75	0.79	1.87	0.32	17.2	2.1	5.2	0.58	52.7	4.7	20.6	1.5	92.9	6.8
nrr_NAV15_12_137	394	177	1.35	0.26	0.0791	0.003	0.97525	0.123	0.019	-0.94134	850	110	495	20	1910	280	0.582353	0.449239	495	20		12100	3400	811	52	36	8.7	0.038	0.012	23.9	2.2	0.22	0.036	2.7	0.34	3.68	0.4	1.95	0.24	16.8	1.8	5.41	0.37	66.9	3.4	25.6	1.7	124	8.6
nrr_NAV15_12_36	456	310	1.011	0.066	0.07395	0.00087	-0.040331	0.0986	0.0065	0.19755	704	32	459.9	5.2	1590	120	0.653267	0.679825	459.9	5.2		9.1	2	1390	140	2.78	0.32	0.92	0.22	55.2	7.7	4.9	1.3	42.9	9.6	24.1	4.3	10.8	2.4	43.8	5.9	13.7	1.9	143	20	45.4	4.8	184	15
nrr_NAV15_12_150	666	390	0.894	0.028	0.0737	0.0012	0.60515	0.0875	0.0022	-0.11566	647	15	458.3	7.1	1365	47	0.708346	0.585586	458.3	7.1		8.1	1.5	1018	82	7.08	0.94	0.29	0.1	51.4	5.7	1.22	0.38	9.3	2.6	7.9	1.6	3.94	0.62	26	3	8.32	0.81	94.1	7.5	33.8	2.6	158	14
nrr_NAV15_12_1	653	565	0.734	0.017	0.06832	0.00045	0.63242	0.078	0.0014	-0.34375	558.7	9.7	426	2.7	1144	36	0.762484	0.865237	426	2.7		11.2	2	1169	32	3.88	0.45	0.361	0.035	47.5	1.9	1.8	0.15	16.4	1.1	14	1.2	8.8	0.81	36.3	2.8	12.1	0.37	121.5	5.2	37.2	1.3	158.3	5
nrr_NAV15_12_22	169	66.8	0.83	0.13	0.0752	0.0015	0.92688	0.079	0.01	-0.87928	597	59	467.1	8.9	1050	190	0.782412	0.395266	467.1	8.9		2.4	1.1	355	25	0.95	0.15	10.6	5	89	37	5.1	2.4	27	12	4.6	1.6	1.14	0.23	8.9	1.1	2.38	0.25	25.9	2.1	10.5	0.71	53.3	5.2
nrr_NAV15_12_129	164.6	108.2	0.715	0.038	0.07472	0.00069	0.72704	0.0689	0.0031	-0.59703	545	22	464.5	4.1	869	94	0.852294	0.657351	464.5	4.1		42	13	795	34	5.41	0.49	0.74	0.28	27.7	1	0.39	0.12	2.42	0.43	3.12	0.56	0.85	0.15	14.2	1.6	5.31	0.41	63.1	3.1	24.8	1.3	126.4	7.3
nrr_NAV15_12_112	623	513.6	0.697	0.011	0.07601	0.00069	-0.049659	0.0667	0.0014	0.48041	536.7	6.4	472.2	4.2	825	42	0.879821	0.824398	472.2	4.2		6.3	1.5	832	25	3.64	0.27	1.3	1	54	5.1	1.86	0.63	11	2.4	7.93	0.97	3.53	0.32	21.5	1.8	6.74	0.46	73.1	3	25.8	1.2	120.8	6.5
nrr_NAV15_12_140	312	170.1	0.6511	0.009	0.07313	0.00067	0.80551	0.06454	0.0005	-0.21075	509	5.5	455	4	759	16	0.89391	0.545192	455	4		6.3	1.8	925	49	1.89	0.22	15.2	4.3	102	21	7.1	1.9	33.8	8.5	9.6	1.4	2.76	0.35	24.2	1.8	7.13	0.5	78	3.6	28.3	1.5	135.9	7.7
NAV15-13
nrr_nav15_13_13	309	215	0.621	0.012	0.07145	0.00088	0.37842	0.06234	0.00092	0.28968	490.3	7.2	444.9	5.3	683	31	0.907404	0.695793	444.9	5.3		3.3	1.5	654	44	1.78	0.18	0.0053	0.0041	21.4	1.7	0.246	0.079	1.4	0.31	2.95	0.4	2.02	0.31	14.9	1.6	5.06	0.57	60.7	4.8	21.5	1.8	97.6	6.7
nrr_nav15_13_48	403	333.3	0.6104	0.0081	0.0716	0.0011	0.93727	0.0616	0.00035	0.49965	483.7	5.1	445.6	6.8	660	12	0.921232	0.827047	445.6	6.8		7.5	2.1	797	44	2.74	0.33	0.028	0.01	32.2	1.7	0.298	0.043	2.5	0.43	3.54	0.38	3.4	0.63	14.3	1.8	5.28	0.48	65	4.5	23.6	1.7	113.9	6
nrr_nav15_13_33	300	167.5	0.563	0.005	0.07179	0.00064	0.80268	0.05688	0.00033	0.077285	453.4	3.3	446.9	3.9	486	13	0.985664	0.558333	446.9	3.9		3.6	1.5	641	32	2.94	0.38	0.014	0.01	24.2	1.9	0.115	0.038	1.13	0.31	1.9	0.32	1.13	0.13	11.7	1	4.03	0.37	50.9	3.5	18.97	0.9	97.2	5.4
nrr_nav15_13_19	161	120.7	0.5778	0.0078	0.0718	0.001	0.84848	0.05826	0.0004	0.39469	463	5	447.1	6	539	15	0.965659	0.749689	447.1	6		3	1.3	404	40	0.96	0.12	0.0078	0.0053	13.1	1.2	0.124	0.044	0.99	0.3	1.79	0.4	0.9	0.17	8.8	1.2	2.95	0.44	30.7	3.5	12.7	1.5	57.7	5.3
nav15_13_19	173	144	0.581	0.013	0.07197	0.0005	0.56928	0.0585	0.0011	-0.28736	465.1	8.1	448	3	544	40	0.963234	0.83237	448	3		28.1	8.3	1000	100	3.2	0.46	0.048	0.051	11.2	1.2	0.103	0.048	2.9	1.3	2.51	0.55	0.97	0.23	16	3.4	5.64	0.86	86	12	30	3.1	142	15
nrr_nav15_13_57	536	363	0.5934	0.0055	0.072	0.0011	0.36438	0.05917	0.00078	0.75513	473	3.5	448	6.8	571	28	0.947146	0.677239	448	6.8		9.5	2.3	1522	74	5.73	0.45	0.0424	0.0096	45.3	2.3	0.433	0.094	3.05	0.45	4.9	0.43	3.83	0.55	28.2	1.9	9.63	0.56	134.4	6.8	47.8	2.5	221.9	8.7
nrr_nav15_13_26	215	120.1	0.557	0.007	0.07207	0.00071	0.82584	0.05608	0.00035	-0.023684	449.5	4.5	448.6	4.3	458	14	0.997998	0.558605	448.6	4.3		4	1.2	421	17	1.57	0.23	0.0101	0.0078	15.3	1.2	0.033	0.018	0.66	0.24	1	0.33	0.615	0.091	6.79	0.91	2.55	0.24	30.1	2.6	12.64	0.73	64.1	4.5
nav15_13_14	165.3	140.2	0.5563	0.0045	0.07208	0.00037	0.56327	0.05583	0.00047	-0.064651	449.1	3	448.7	2.2	448	18	0.999109	0.848155	448.7	2.2		7.7	2.8	923	34	4.16	0.68	0.024	0.041	25.6	1.6	0.072	0.026	2.7	1.1	2.28	0.52	0.94	0.21	15.5	1.8	5.8	0.59	83.3	4.9	30.9	1.5	144.1	5.6
nav15_13_16	481	306.1	0.5632	0.0051	0.07213	0.00039	0.77788	0.05629	0.00032	-0.16082	453.6	3.3	449	2.4	464	13	0.989859	0.636383	449	2.4		4.8	2.3	848	44	4.19	0.59	-0.002	0.027	30.5	2.1	0.052	0.039	2.91	0.59	2.73	0.78	0.96	0.27	10.6	1.4	4.89	0.6	70.7	6.3	25.8	2.2	125	7.4
nav15_13_25	259.1	232.4	0.5585	0.0041	0.07217	0.00037	0.4267	0.05587	0.00038	0.3978	451	2.8	449.2	2.3	450	14	0.996009	0.896951	449.2	2.3		6.5	1.8	1111	32	3.67	0.39	0.2	0.1	14.47	0.81	0.112	0.04	4	1.1	2.11	0.51	1.03	0.18	16.7	2.1	6.74	0.55	99.9	5.6	37.6	1.9	177.9	9.6
nrr_nav15_13_7	238	223.9	0.5589	0.0078	0.07219	0.00079	0.85329	0.05637	0.00037	-0.13323	450.7	5	449.3	4.8	466	14	0.996894	0.940756	449.3	4.8		6.2	1.8	1062	37	7.74	0.56	0.0079	0.0059	38.1	1.2	0.144	0.038	1.33	0.29	2.86	0.48	0.94	0.14	16.6	1.3	6.52	0.37	90.7	4.5	35.6	1.1	166.2	5.9
nav15_13_3	318	194	0.5642	0.0058	0.07225	0.00058	0.84204	0.05627	0.00032	0.096317	454.2	3.8	449.7	3.5	463	13	0.990092	0.610063	449.7	3.5		3.6	2.8	624	69	1.83	0.52	0.015	0.026	18.9	2.7	0.042	0.032	1.88	0.77	1.16	0.28	0.92	0.23	11.6	2	3.38	0.56	50.1	7.2	18.8	2.4	92	12
nrr_nav15_13_34	312.3	202	0.5809	0.0057	0.07234	0.00076	0.8317	0.05802	0.00037	0.42707	465	3.7	450.2	4.6	530	14	0.968172	0.646814	450.2	4.6		4.4	1.5	517	19	2.63	0.23	0.0094	0.0082	23.7	1.2	0.08	0.042	1	0.2	1.79	0.3	0.98	0.14	9.89	0.84	3.2	0.25	42	2.1	15.37	0.95	80.2	4.6
nrr_nav15_13_42	343	240.8	0.573	0.0075	0.07239	0.00083	0.88337	0.05703	0.00033	0.074815	459.9	4.9	450.5	5	492	13	0.979561	0.702041	450.5	5		5.2	1.9	528	25	2.1	0.22	0.0117	0.0066	28.7	1.5	0.126	0.035	1.02	0.29	1.48	0.34	0.86	0.15	8.71	0.92	2.93	0.22	39.4	2.4	15.56	0.72	82.9	3.2
nrr_nav15_13_3	264	109.7	0.5909	0.0063	0.0724	0.00065	0.80663	0.05911	0.0004	0.21516	471.4	4	450.6	3.9	570	15	0.955876	0.41553	450.6	3.9		4.4	1.5	440	13	1.83	0.15	0.0072	0.0042	14.77	0.62	0.106	0.036	0.54	0.16	1.83	0.48	1.09	0.15	7.78	0.83	2.86	0.21	36.2	2	13.05	0.66	65.7	2.4
nrr_nav15_13_37	237.3	146.4	0.5647	0.0065	0.07242	0.00066	0.85214	0.05643	0.00036	-0.10364	454.5	4.2	450.7	4	469	14	0.991639	0.616941	450.7	4		4.9	1.4	506	17	2.02	0.23	0.0101	0.0075	18.39	0.76	0.114	0.047	1.11	0.15	1.73	0.35	0.73	0.12	9.1	1.2	3	0.22	38.1	2.2	15.73	0.81	77.8	3.5
nrr_nav15_13_28	190	187.8	0.5598	0.0067	0.07243	0.00069	0.82355	0.05615	0.00036	-0.02707	451.3	4.4	450.7	4.2	458	14	0.998671	0.988421	450.7	4.2		8.4	1.8	808	26	3.79	0.36	0.0017	0.0027	28.38	0.95	0.151	0.036	1.41	0.25	2.29	0.41	0.79	0.1	14	1.4	5.48	0.46	65.4	3	26.2	1.1	124.1	5.3
nav15_13_20	460	429	0.5606	0.0052	0.07251	0.00065	0.86539	0.05564	0.00028	0.22677	451.9	3.4	451.2	3.9	438	11	0.998451	0.932609	451.2	3.9		3.2	1.5	1042	92	2.48	0.4	0.066	0.044	30.3	3.4	0.182	0.068	6.4	1.5	5.66	0.88	1.73	0.36	19.7	2.8	6.9	0.9	96	11	31.5	3.3	147	14
nrr_nav15_13_21	241.6	138.6	0.5652	0.006	0.07249	0.00064	0.84007	0.05651	0.00034	0.086642	454.8	3.9	452	4.1	475	13	0.993843	0.573675	452	4.1		3.4	1.3	374	15	2.06	0.2	0.014	0.0079	18.15	0.85	0.058	0.027	0.42	0.15	0.94	0.23	0.48	0.074	7.61	0.75	2.3	0.28	25.9	2	11.73	0.59	57.6	3.3
nrr_nav15_13_41	64.3	28.93	0.5743	0.0082	0.07269	0.00071	0.48686	0.05686	0.00078	0.17506	461.6	5.5	452.3	4.3	483	30	0.979853	0.449922	452.3	4.3		5.7	1.4	252.5	8.7	0.51	0.11	0.002	0.0025	6.27	0.46	0.052	0.022	0.44	0.13	0.72	0.21	0.37	0.11	4.37	0.6	1.5	0.16	19.3	1.1	7.81	0.34	39.8	2.3
nav15_13_29	284	173.6	0.5643	0.0059	0.07268	0.00057	0.65767	0.05624	0.00046	0.40406	454.3	3.8	452.3	3.4	464	19	0.995598	0.611268	452.3	3.4		3.3	2.1	383	21	2.13	0.5	0.014	0.08	21.23	0.96	0.026	0.025	0.44	0.42	0.96	0.31	0.41	0.15	5.39	0.99	2.03	0.3	28.1	3.2	11.7	1.2	58.3	4.8
nrr_nav15_13_35	229	146.4	0.5716	0.0056	0.07275	0.00076	0.82846	0.05706	0.00034	0.12252	459	3.6	452.7	4.6	493	13	0.986275	0.639301	452.7	4.6		4.6	1.6	468	19	1.83	0.21	0.0072	0.0056	19.6	1.1	0.081	0.034	1.18	0.27	1.48	0.29	0.84	0.12	9.9	1.1	3.1	0.34	39.7	3.4	14.7	0.86	73.7	4.1
nav15_13_23	386	305	0.5681	0.0081	0.07277	0.00077	0.91256	0.05629	0.00031	-0.17755	456.6	5.3	452.8	4.6	466	13	0.991678	0.790155	452.8	4.6		5.6	2.5	940	100	1.47	0.46	0.047	0.045	25.2	2.4	0.153	0.059	6.1	2	4.09	0.88	1.8	0.46	21.3	3.7	6.2	1	91	10	29.7	3.9	137	15
nrr_nav15_13_62	110.3	81.9	0.5614	0.0075	0.07281	0.00075	0.62589	0.05595	0.00059	0.25501	452.3	4.9	453	4.5	449	23	1.00155	0.74252	453	4.5		6.9	1.5	548	19	0.48	0.11	0.0017	0.003	8.88	0.52	0.216	0.049	2.26	0.36	2.5	0.33	1.33	0.14	13	1.4	3.71	0.37	50.4	2.1	17.73	0.98	80.2	2.3
nav15_13_6	380.4	284	0.5718	0.0047	0.07284	0.00032	0.56872	0.05697	0.00035	-0.075827	459.1	3	453.2	1.9	490	13	0.987149	0.746583	453.2	1.9		3.4	2.3	430	17	2.22	0.43	5	4.3	52	20	1.8	1.4	16	12	1.78	0.72	0.82	0.16	9.8	1.8	2.56	0.31	33.9	2.2	13.04	0.68	63.9	2.9
nrr_nav15_13_8	144.4	85.5	0.5727	0.0062	0.07285	0.00063	0.78399	0.05719	0.0004	-0.077853	459.7	4	453.3	3.8	498	15	0.986078	0.592105	453.3	3.8		3.4	1.6	318	12	1.07	0.15	0.49	0.33	15.9	1.9	0.57	0.34	1.82	0.94	1.21	0.28	0.56	0.11	6.18	0.98	2.03	0.19	26.2	1.6	10.11	0.45	47.5	2.6
nrr_nav15_13_12	103.3	42.73	0.5658	0.0067	0.07291	0.00068	0.53254	0.05653	0.0006	0.24178	455.2	4.3	453.6	4.1	476	22	0.996485	0.41365	453.6	4.1		2	1.7	177	4.8	0.75	0.12	0.0132	0.0081	9.66	0.59	0.019	0.014	0.235	0.092	0.46	0.14	0.216	0.049	2.81	0.5	1.09	0.16	13.7	1.2	5.83	0.19	27.5	1.6
nrr_nav15_13_25	178	104.9	0.5658	0.0087	0.07293	0.00093	0.8691	0.05604	0.0004	0.083179	455.1	5.6	453.7	5.6	453	16	0.996924	0.589326	453.7	5.6		3.5	1.3	353	18	1.49	0.17	0.0104	0.0074	14.93	0.99	0.068	0.027	0.66	0.18	1.42	0.26	0.52	0.11	6.44	0.78	2.01	0.19	25.5	1.6	10.48	0.49	53.3	4.4
nav15_13_8	311	214.4	0.5693	0.0057	0.07294	0.00046	0.79235	0.0565	0.00032	-0.057068	457.5	3.7	453.9	2.8	474	13	0.992131	0.689389	453.9	2.8		0.9	1.9	530	26	1.89	0.33	0.027	0.029	21.3	1.8	0.037	0.041	0.64	0.41	0.93	0.33	0.55	0.15	6.5	1.2	2.79	0.28	42.8	4	16	1.1	81.6	5.1
nrr_nav15_13_36	247.9	149	0.5891	0.0045	0.07296	0.00067	0.64135	0.05837	0.00049	0.48677	470.3	2.8	454	4	543	18	0.965341	0.601049	454	4		6.9	1.6	418	16	1.87	0.19	12.07	0.72	77.4	3.8	8.42	0.7	21.3	1.4	3.19	0.53	1.09	0.17	9.7	1.2	2.82	0.14	36	1.9	12.7	0.74	63.8	2.9
nrr_nav15_13_61	324	286.8	0.5707	0.0064	0.07297	0.00081	0.90341	0.05663	0.00029	0.015121	458.4	4.1	454	4.8	477	11	0.990401	0.885185	454	4.8		2.7	1.5	346	11	1.74	0.18	0.0048	0.0034	24.9	1.3	0.073	0.025	0.86	0.23	1.27	0.27	0.69	0.12	7.5	1	2.14	0.19	30.2	1.6	10.98	0.86	53.8	2.7
nav15_13_26	490	327	0.5663	0.0093	0.073	0.0013	0.96998	0.05591	0.00023	0.3826	455.5	6	454.1	7.5	448.6	9.1	0.996926	0.667347	454.1	7.5		3.2	2.2	920	140	5.5	1.3	0.031	0.06	33.2	6.6	0.077	0.039	2.46	0.96	1.91	0.62	1.17	0.39	12	2.6	4.64	0.97	72	17	28.4	5.4	145	25
nav15_13_22	503	241	0.5643	0.0039	0.07302	0.00038	0.69459	0.05575	0.00027	0.066717	454.3	2.5	454.3	2.3	442	11	1	0.479125	454.3	2.3		3.6	2.2	803	74	2.77	0.45	0.046	0.052	24.1	3	0.024	0.029	1.53	0.79	2.13	0.46	0.79	0.2	10.1	1.7	4.25	0.54	63.3	6.1	25.3	2.2	126	12
nrr_nav15_13_51	377	528	0.5644	0.0054	0.07303	0.00083	0.90656	0.05596	0.00025	0.45295	454.4	3.5	454.4	5	450.5	9.8	1	1.40053	454.4	5		16.9	2.5	2014	67	4.58	0.4	0.0163	0.0081	20	1.3	0.258	0.057	3.32	0.31	5.34	0.94	2.25	0.22	39.4	2.9	13.67	0.7	185.3	7.7	67.3	2.5	315	12
nrr_nav15_13_29	270	201	0.5687	0.0059	0.07307	0.00064	0.86412	0.05625	0.00034	0.009433	457.1	3.8	454.6	3.8	462	13	0.994531	0.744444	454.6	3.8		3.4	1.5	417	13	1.46	0.16	0.0081	0.0055	20.05	0.89	0.088	0.036	0.71	0.19	1.03	0.3	0.63	0.11	7.4	0.96	2.4	0.23	32	1.8	12.89	0.49	67.4	2.8
nav15_13_27	372	260.9	0.5659	0.0047	0.07306	0.00033	0.59483	0.05574	0.00042	-0.040195	455.3	3.1	454.6	2	444	16	0.998463	0.701344	454.6	2		4.6	2.2	695	32	3.08	0.54	0.062	0.092	25.7	1.6	0.083	0.035	3.04	0.69	1.8	0.32	0.82	0.19	9.6	1.9	3.78	0.58	56.9	4.1	20.8	1.5	107.2	5.9
nrr_nav15_13_67	291	217.9	0.5703	0.0052	0.0731	0.00068	0.87647	0.05664	0.00031	0.20401	458.2	3.4	454.8	4.1	477	12	0.99258	0.748797	454.8	4.1		2.6	1.4	709	33	1.49	0.27	0.0056	0.005	23.2	1.2	0.228	0.056	3	0.49	3.29	0.47	1.66	0.25	18.4	1.5	5.32	0.29	65.6	4.2	21.4	1.2	106.2	4.3
nrr_nav15_13_23	298	195.5	0.5673	0.0052	0.07312	0.00062	0.80469	0.05651	0.00031	0.048004	456.2	3.4	454.9	3.7	472	12	0.99715	0.65604	454.9	3.7		2.6	1.5	358.1	6.9	1.84	0.23	0.0077	0.0059	22.17	0.79	0.089	0.032	0.64	0.13	0.95	0.22	0.56	0.14	6.59	0.67	2.44	0.22	26.2	1.4	11.08	0.56	52.2	2.1
nrr_nav15_13_22	218	115.7	0.5725	0.0063	0.07316	0.00078	0.80485	0.05688	0.00034	0.41553	459.6	4	455.1	4.7	486	13	0.990209	0.530734	455.1	4.7		1.8	1.2	412	18	1.68	0.28	0.004	0.0042	17.5	1.1	0.071	0.032	0.69	0.15	1.24	0.23	0.665	0.096	7.4	1	2.4	0.2	29.9	2.2	13.31	0.74	66.2	4
nav15_13_17	629	566	0.5653	0.0052	0.0732	0.00051	0.90403	0.05595	0.0003	-0.19827	454.9	3.4	455.4	3	452	12	1.0011	0.899841	455.4	3		6.2	2.3	1720	100	2.55	0.35	0.071	0.046	39.8	3.5	0.376	0.084	9.8	1.8	10.2	1.2	3.34	0.86	38	3.4	13	0.95	169	15	54.3	3.6	242	12
nrr_nav15_13_55	364	201.5	0.5757	0.0052	0.07321	0.00069	0.88213	0.0566	0.00027	0.18255	461.6	3.4	455.4	4.2	476	10	0.986568	0.553571	455.4	4.2		4.5	1.3	721	22	3.49	0.3	0.0071	0.0051	25.4	1.3	0.101	0.03	1.38	0.28	1.76	0.26	1.11	0.14	12.3	1.1	4.27	0.3	60.7	2.9	22.34	0.74	105.6	4.8
nrr_nav15_13_27	305	193.6	0.5894	0.0079	0.07325	0.00076	0.92442	0.05817	0.00029	-0.45013	470.4	5	455.7	4.6	536	11	0.96875	0.634754	455.7	4.6		5.3	1.6	563	20	3.25	0.35	0.176	0.032	24.5	1.1	0.092	0.033	1.11	0.22	1.64	0.27	0.78	0.12	8.92	0.94	3.12	0.27	41.4	2.7	17.6	1.1	88.2	4.5
nav15_13_33	182.4	92	0.5766	0.0055	0.07327	0.00039	0.61613	0.05639	0.00045	-0.077432	462.2	3.5	455.8	2.3	467	18	0.986153	0.504386	455.8	2.3		2.4	1.8	338	11	1.12	0.27	0.025	0.061	12.6	1	0.047	0.029	1.02	0.63	0.55	0.23	0.39	0.13	4.9	1.1	1.8	0.15	26.3	2.9	9.58	0.8	57.3	2
nrr_nav15_13_11	172	169	0.5726	0.0077	0.0733	0.00073	0.71675	0.05671	0.00052	0.10369	459.6	5	456	4.4	479	20	0.992167	0.982558	456	4.4		8.4	2.4	953	95	3.65	0.92	1.3	1.3	29	11	1.6	1.4	5.3	3.7	3.78	0.74	1.3	0.17	17.5	1.6	6.52	0.75	89.1	8	33.3	3	147	15
nrr_nav15_13_58	371	228	0.5701	0.0068	0.07333	0.00077	0.9116	0.05641	0.00025	0.046108	458	4.4	456.2	4.6	468.4	9.9	0.99607	0.614555	456.2	4.6		2.1	1	440	18	2.61	0.23	0.0021	0.0023	24.2	1.3	0.049	0.026	0.84	0.25	1.41	0.24	0.74	0.12	8.1	1.1	2.8	0.3	40.4	2.4	14.22	0.79	68.5	1.8
nrr_nav15_13_64	259	294.8	0.5656	0.0079	0.07335	0.00082	0.92822	0.05611	0.0003	-0.15437	455	5.1	456.3	4.9	456	12	1.00286	1.13822	456.3	4.9		4.3	1.4	1520	50	3.31	0.25	0.0094	0.0071	36	1.7	0.179	0.055	2.61	0.46	5.09	0.57	1.43	0.2	30.3	3.3	10.4	0.58	141.9	6.1	49.1	2.6	232.9	9.7
nrr_nav15_13_30	272	171.7	0.5702	0.0086	0.07335	0.00097	0.92438	0.05622	0.0003	-0.081135	458	5.6	456.3	5.8	460	12	0.996288	0.63125	456.3	5.8		3.4	1.3	473	19	2.05	0.2	0.0136	0.0084	23.6	1.5	0.073	0.026	0.49	0.14	1.16	0.31	0.582	0.099	7.52	0.89	2.64	0.25	36.6	2.3	14.67	0.64	77.5	2.6
nrr_nav15_13_63	258	339	0.5675	0.0065	0.07337	0.00084	0.87682	0.05629	0.00028	0.33375	456.3	4.2	456.4	5	463	11	1.00022	1.31395	456.4	5		10.9	2.4	1430	130	2.94	0.38	0.038	0.022	50.6	3.5	0.73	0.15	8.4	1.2	12	1.7	2.85	0.41	52.3	5.6	13.9	1.4	163	16	48.5	4.8	189	14
nrr_nav15_13_50	287	169.3	0.5712	0.0068	0.07339	0.00072	0.87289	0.05667	0.00026	-0.015554	458.7	4.4	456.5	4.3	479	10	0.995204	0.589895	456.5	4.3		4.4	1.3	537	14	2.96	0.25	0.0094	0.0063	24.1	1.2	0.087	0.032	0.78	0.21	1.48	0.34	1.24	0.18	8.6	1.3	3.01	0.3	42.2	1.8	15.35	0.71	82.2	4.1
nrr_nav15_13_43	376	312.7	0.5748	0.0076	0.07342	0.00095	0.93532	0.05655	0.00027	0.093632	461	4.9	456.7	5.7	474	10	0.990672	0.831649	456.7	5.7		3.4	1.2	397.1	8.3	1.8	0.18	0.0034	0.0036	29.48	0.97	0.085	0.045	1.07	0.25	1.36	0.37	0.67	0.13	8.4	1	2.57	0.24	31.2	2	11.89	0.45	59.2	2.4
nrr_nav15_13_47	458	387.7	0.5702	0.0061	0.07342	0.00078	0.94444	0.05626	0.00024	0.15701	458.1	4	456.7	4.7	462.4	9.4	0.996944	0.846507	456.7	4.7		5.9	1.3	505	14	2.36	0.26	0.0111	0.0067	27.95	0.92	0.099	0.034	1.35	0.3	1.32	0.28	0.88	0.15	11.2	1.4	3.49	0.34	41.2	2.5	15.38	0.86	76.2	2.6
nav15_13_18	418	229.2	0.5713	0.0063	0.07345	0.00068	0.88791	0.05627	0.00032	0.068659	458.8	4	456.9	4.1	463	13	0.995859	0.548325	456.9	4.1		0.8	1.9	746	31	2.52	0.47	0.03	0.045	21.9	2.5	0.049	0.033	2.43	0.66	2.66	0.73	0.99	0.21	11.6	1.5	4.05	0.39	63.2	3.9	23	1.5	115.3	8.6
nrr_nav15_13_20	331	292	0.5797	0.0058	0.07353	0.00083	0.76945	0.05755	0.00046	0.62208	464.9	3.9	457.4	5	512	18	0.983867	0.882175	457.4	5		3.5	1.6	924	72	1.77	0.25	0.034	0.015	26.9	2.5	0.398	0.063	4.2	0.57	5.3	0.83	2.74	0.49	25.9	3.1	7.69	0.95	83.8	6	29.8	2.2	132	10
nav15_13_28	190	76.6	0.5839	0.0057	0.07358	0.00035	0.78695	0.05734	0.00038	-0.22514	466.9	3.7	457.7	2.1	504	15	0.980296	0.403158	457.7	2.1		4.5	1.7	251	15	1.3	0.36	0.049	0.061	12.43	0.8	0.018	0.021	0.42	0.47	0.63	0.21	0.42	0.11	3.38	0.96	1.39	0.3	19.6	1.9	7.32	0.8	37.9	2.7
nrr_nav15_13_53	181.9	104	0.5727	0.007	0.07362	0.00073	0.90656	0.05633	0.00035	-0.32334	459.7	4.5	457.9	4.4	468	13	0.996084	0.571743	457.9	4.4		6.7	1.5	508	19	1.18	0.17	0.0028	0.0031	10.47	0.62	0.081	0.033	0.8	0.21	1.23	0.25	0.66	0.13	8.15	0.67	2.75	0.28	39	2	15.63	0.84	76.8	3.5
nrr_nav15_13_1	387	188.1	0.5705	0.0054	0.07361	0.00062	0.87392	0.05621	0.00029	0.029533	458.3	3.5	457.9	3.7	462	11	0.999127	0.486047	457.9	3.7		2.3	1.3	651	42	2.23	0.24	0.0061	0.0034	21.8	1.7	0.089	0.038	0.65	0.16	1.75	0.29	0.68	0.12	11.8	2	3.75	0.32	50.7	3.9	19.3	1.2	94	6.3
nav15_13_30	188	101.6	0.5646	0.0066	0.07367	0.00047	0.62917	0.05542	0.0005	0.06848	455.2	4.1	458.2	2.8	428	20	1.00659	0.540426	458.2	2.8		1.6	2.4	211	12	0.99	0.31	0.049	0.058	12.5	1.1	0.015	0.026	1.16	0.6	0.59	0.2	0.38	0.14	3.1	1	1.43	0.19	17.4	1.9	6.93	0.55	34.7	3.2
nrr_nav15_13_38	176.9	145.2	0.602	0.014	0.0738	0.001	0.94373	0.05908	0.0006	-0.66445	478	8.7	458.8	6.2	568	22	0.959833	0.820803	458.8	6.2		2.7	1.4	415	15	0.95	0.11	3.2	2.5	33	11	2.1	1.5	7	4.6	2.15	0.52	0.87	0.19	10.3	1.2	3.04	0.26	36.9	2.8	13.36	0.8	62.7	3.7
nrr_nav15_13_45	419	247	0.5892	0.0079	0.07377	0.00095	0.9444	0.05742	0.00026	-0.15136	470.2	5.1	458.8	5.7	509.3	9.3	0.975755	0.589499	458.8	5.7		5.1	1.2	889	57	4.68	0.55	0.0112	0.0069	33.1	2.8	0.14	0.036	1.48	0.26	2.81	0.63	1.61	0.19	15.9	1.4	5.25	0.51	66.5	4.9	25	1.4	136	10
nrr_nav15_13_5	308	274.9	0.632	0.02	0.0738	0.001	0.69164	0.0623	0.0014	-0.50349	497	12	458.9	6.1	680	44	0.92334	0.892532	458.9	6.1		27.6	3.4	1072	41	5.6	0.49	0.53	0.067	59	2.7	0.512	0.081	2.64	0.31	3.47	0.42	1.31	0.13	21.8	1.2	7.45	0.39	96.9	4	36.2	1.8	158.1	7.7
nrr_nav15_13_44	245	177.8	0.573	0.0096	0.0738	0.0012	0.93141	0.05611	0.00033	0.096084	459.8	6.2	459.2	7.1	456	13	0.998695	0.725714	459.2	7.1		3.4	1	411	18	1.67	0.19	0.0058	0.004	20.4	1.2	0.071	0.035	0.65	0.18	0.95	0.26	0.442	0.075	7.6	1	2.31	0.25	29.3	2	12.12	0.64	63.1	3.1
nrr_nav15_13_65	353	526.6	0.576	0.008	0.07386	0.00086	0.95758	0.05647	0.00024	-0.22785	461.8	5.1	459.3	5.1	472.3	9.7	0.994586	1.49178	459.3	5.1		11.5	2.3	2410	110	5.42	0.54	0.0137	0.0092	98.4	5.6	0.469	0.085	5.33	0.59	8.61	0.84	4.48	0.35	55.9	3.6	17.88	0.95	240	12	81.4	5.4	358	21
nrr_nav15_13_4	219	117.6	0.5734	0.0068	0.07388	0.00069	0.85731	0.05666	0.00035	-0.0084049	460.1	4.4	459.5	4.2	478	14	0.998696	0.536986	459.5	4.2		3.4	1.4	422	14	1.72	0.21	0.0079	0.0052	16.42	0.86	0.086	0.036	0.56	0.15	1.11	0.17	0.52	0.11	7.47	0.59	2.47	0.13	32.6	1.7	12.97	0.61	64.3	2.7
nav15_13_32	406	318	0.5725	0.006	0.07397	0.0006	0.8626	0.05594	0.00027	0.18278	459.6	3.9	460	3.6	450	11	1.00087	0.783251	460	3.6		2.5	2.2	397	22	1.8	0.37	0.057	0.069	24.5	1.5	0.039	0.022	1.76	0.64	1.22	0.31	0.55	0.12	5.45	0.81	2.17	0.24	32.5	2.6	11.71	0.76	64.7	3
nrr_nav15_13_16	109.9	73.1	0.574	0.011	0.07402	0.00081	0.79966	0.05694	0.00063	-0.30174	460.1	7	460.3	4.9	488	24	1.00043	0.66515	460.3	4.9		3.3	1.5	286	26	0.71	0.12	0.0029	0.0028	10.43	0.8	0.079	0.035	0.47	0.14	1.32	0.31	0.42	0.12	6.7	1.2	2	0.3	23.6	2.8	9.3	1.1	42.9	3
nav15_13_7	424	380.8	0.5986	0.0081	0.07411	0.00051	-0.05986	0.059	0.001	0.47212	476.2	5.1	460.9	3.1	564	38	0.967871	0.898113	460.9	3.1		11.3	4.3	955	43	1.72	0.41	0.56	0.32	32.4	2.8	0.285	0.082	8.67	0.93	3.68	0.52	2.46	0.25	22.9	2.5	7.07	0.74	88.6	5.3	29.1	1.3	132	6.7
nav15_13_10	311.2	224.6	0.5921	0.0072	0.07411	0.00038	0.66827	0.05812	0.00051	-0.077543	472.1	4.6	460.9	2.3	533	19	0.976276	0.721722	460.9	2.3		2.5	1.9	625	17	1.94	0.41	0.4	0.21	20.7	1.3	0.2	0.063	3.2	1.2	2.14	0.45	0.97	0.15	12.5	1.5	4.08	0.43	51.4	4.1	19.48	0.97	98.1	4.4
nrr_nav15_13_24	204	147.4	0.5734	0.0076	0.07414	0.0008	0.90947	0.05645	0.0003	-0.099402	460.1	4.9	461	4.8	470	12	1.00196	0.722549	461	4.8								0.0017	0.0027	16.74	0.96	0.108	0.034	1.16	0.27	1.57	0.4	0.72	0.15	8.8	1	2.76	0.31	31.1	2	12.1	0.74	59.8	3.3
nav15_13_5	329	238.4	0.5779	0.006	0.07413	0.00048	0.74141	0.05688	0.00034	0.07777	463.7	4	461	2.9	487	13	0.994177	0.72462	461	2.9		1.1	1.6	684	29	1.56	0.31	0.016	0.031	21	1.2	0.097	0.033	2.7	0.85	1.71	0.48	1.1	0.22	15.3	1.6	4.2	0.41	58.4	3.5	21.3	1.8	101.5	7.3
nrr_nav15_13_49	230.5	131.5	0.5776	0.0093	0.07416	0.00089	0.9239	0.05642	0.00034	-0.3178	462.8	6	461.1	5.3	468	13	0.996327	0.570499	461.1	5.3		4	2.1	441	10	1.86	0.25	0.0011	0.002	18.58	0.69	0.041	0.022	0.61	0.19	1.32	0.25	0.6	0.12	8.17	0.97	2.57	0.29	33.8	1.2	12.81	0.53	66.9	2
nrr_nav15_13_17	132	71.4	0.618	0.017	0.0743	0.0014	0.69768	0.06031	0.00081	-0.42601	488	11	462	8.2	612	29	0.946721	0.540909	462	8.2		4.3	1.5	256	28	1.01	0.22	0.111	0.038	10.86	0.95	0.063	0.035	0.47	0.15	0.85	0.21	0.43	0.12	5.06	0.91	1.57	0.22	18.6	1.9	7.96	0.85	37.7	3.7
nav15_13_15	304	248	0.638	0.014	0.07434	0.00092	-0.14178	0.0617	0.0016	0.54515	500.5	8.7	462.3	5.5	655	53	0.923676	0.815789	462.3	5.5		3.6	2.5	665	89	1.54	0.47	7.1	6.3	46	19	1.3	1	16	10	4.1	1.8	1.26	0.43	13.6	3.1	4.65	0.74	64.5	9.8	22.1	2.8	94	13
nrr_nav15_13_59	207.8	119.3	0.5796	0.0061	0.07441	0.00076	0.85353	0.05648	0.00032	0.37742	464.1	3.9	462.7	4.6	473	12	0.996983	0.57411	462.7	4.6		2.7	1.3	330.6	9	1.71	0.16	0.0049	0.0028	16.52	0.83	0.07	0.033	0.64	0.18	1.12	0.29	0.55	0.14	5.83	0.74	2	0.18	27.4	1.5	11.01	0.48	50.5	1.9
nav15_13_12	310	177	0.5719	0.0061	0.07441	0.00049	0.72255	0.05568	0.00032	0.024018	459.2	3.9	462.7	2.9	439	13	1.00762	0.570968	462.7	2.9		2.1	1.8	515	45	2.59	0.53	-0.008	0.026	22.1	2.5	0.064	0.036	0.78	0.56	0.98	0.32	0.48	0.16	7.6	1.4	2.62	0.46	42.6	4.5	15.4	1.7	75.6	7.6
nrr_nav15_13_46	235	87.2	0.5733	0.0055	0.07444	0.00068	0.83555	0.0562	0.0003	0.5109	460.7	3.4	462.8	4.1	460	12	1.00456	0.371064	462.8	4.1		1	1.1	379	26	1.55	0.24	0.0088	0.0064	12.1	1.1	0.041	0.019	0.26	0.11	0.85	0.2	0.522	0.095	5.8	1	1.96	0.18	25.5	1.7	10.43	0.68	54.2	2.8
nav15_13_1	305	339.2	0.6499	0.0052	0.07443	0.00047	0.51071	0.06364	0.00044	0.4227	508.3	3.2	462.8	2.8	732	15	0.910486	1.11213	462.8	2.8		4.9	2	1573	46	2.16	0.23	0.001	0.02	40.1	2.1	0.375	0.06	10.7	1	6.55	0.64	3.15	0.38	41.3	3.5	11.68	0.79	158.6	8.5	50	2	220.3	8.7
nrr_nav15_13_39	147.9	77.5	0.6634	0.0084	0.07448	0.00071	0.73956	0.06431	0.00054	-0.085846	516.6	5.1	463.1	4.2	751	18	0.896438	0.524003	463.1	4.2		3.6	1.4	318	12	0.89	0.18	0.0075	0.0052	11.58	0.49	0.052	0.026	0.53	0.14	1.15	0.28	0.64	0.17	5.16	0.73	1.87	0.18	25.3	1.5	9.47	0.51	48.9	2.1
nrr_nav15_13_73	183	125.1	0.5784	0.0074	0.07464	0.00096	0.86264	0.05604	0.00038	0.41104	463.4	4.7	464	5.8	453	15	1.00129	0.683607	464	5.8		4.4	1.4	440	26	0.95	0.14	0.0131	0.0068	13.81	0.95	0.167	0.045	1.98	0.37	2.23	0.42	1.08	0.19	12	1.2	3.13	0.24	40.1	3.4	13.69	0.82	66.3	4.4
nrr_nav15_13_52	407	308.4	0.5807	0.0077	0.0747	0.001	0.92328	0.05617	0.0003	0.31193	464.8	4.9	464.4	6.2	461	11	0.999139	0.75774	464.4	6.2		8.7	1.8	946	54	3.21	0.28	0.0075	0.0049	28.5	1.8	0.159	0.042	1.8	0.38	2.32	0.26	1.62	0.36	16.2	1.7	5.94	0.59	76.5	6.2	28.5	1.8	143.2	8.5
nrr_nav15_13_40	294.7	224.1	0.5807	0.0083	0.07471	0.00098	0.94881	0.05616	0.00026	-0.090451	464.8	5.4	464.5	5.9	458	10	0.999355	0.760434	464.5	5.9		3.5	1.6	711	19	1.88	0.28	0.0059	0.0046	22.51	0.87	0.209	0.056	2.7	0.37	3.72	0.56	1.45	0.16	18.3	1.3	5.36	0.38	60.9	2.3	22.78	0.76	107.4	4.5
nrr_nav15_13_6	177.9	76.74	0.638	0.011	0.07474	0.0006	-0.50222	0.0622	0.0015	0.7645	500.8	6.8	464.7	3.6	673	51	0.927915	0.431366	464.7	3.6		2.6	1	239	10	1.45	0.16	0.0039	0.0029	12.83	0.36	0.044	0.028	0.39	0.14	0.72	0.19	0.255	0.072	3.47	0.52	1.36	0.17	19.93	0.96	7.62	0.43	37.7	2.2
nav15_13_11	585	450	0.5768	0.0061	0.07476	0.00076	0.89049	0.05602	0.00031	0.17453	462.3	4	464.8	4.6	453	12	1.00541	0.769231	464.8	4.6		6.7	2.4	859	71	4.43	0.68	0.016	0.03	42.9	4	0.074	0.044	1.41	0.79	1.88	0.41	1.09	0.25	14.3	2.4	4.99	0.85	76	6.9	26	2.4	127	10
nrr_nav15_13_60	325	212.3	0.5781	0.009	0.0748	0.0011	0.93183	0.05618	0.0003	-0.195	463.1	5.8	464.9	6.6	459	12	1.00389	0.653231	464.9	6.6		4.6	1.8	531	25	2.9	0.25	0.0059	0.0049	29.3	1.5	0.085	0.046	0.78	0.19	1.65	0.41	0.72	0.11	9.2	1.1	3.17	0.26	45.5	2.3	16.68	0.83	82.4	3.9
nrr_nav15_13_56	168	174.8	0.5847	0.0083	0.07483	0.00088	0.78754	0.05639	0.00047	0.058879	468.4	5.1	465.2	5.3	467	18	0.993168	1.04048	465.2	5.3		8.5	1.2	612	15	2.79	0.29	0.0062	0.0043	52.1	1.8	0.107	0.033	1.74	0.27	3.38	0.36	1.19	0.15	18.1	1	5.27	0.42	64.7	2.8	20.8	1	85	3.9
nrr_nav15_13_10	266	190.4	0.5848	0.0066	0.07491	0.00098	0.91392	0.0568	0.00031	0.37745	467.5	4.2	465.6	5.9	484	12	0.995936	0.715789	465.6	5.9		2.8	1.3	347	16	1.36	0.16	0.0063	0.0046	20.7	1.3	0.043	0.023	0.51	0.19	1.23	0.32	0.45	0.12	6.35	0.9	2.03	0.24	28.5	2.3	11.48	0.91	53.9	4.4
nrr_nav15_13_2	195.1	108.1	0.5877	0.0055	0.07509	0.00077	0.82653	0.05655	0.00037	0.25563	469.4	3.5	466.7	4.6	474	15	0.994248	0.554075	466.7	4.6		4.2	1.2	393	13	0.99	0.17	0.003	0.0034	13.16	0.77	0.08	0.033	0.66	0.11	1.05	0.26	0.61	0.12	7.1	1.1	2.41	0.23	31.2	1.4	11.89	0.51	55.9	2.2
nrr_nav15_13_72	129	57.4	0.587	0.014	0.0751	0.0015	0.9178	0.05681	0.00055	-0.068636	468.7	8.7	466.7	9.3	483	21	0.995733	0.444961	466.7	9.3		3	1.6	269	54	1.01	0.23	0.0127	0.0078	10.1	1.5	0.056	0.029	0.46	0.18	0.65	0.23	0.43	0.15	4.9	1.6	1.55	0.39	20.3	4.9	7.8	1.6	44	10
nrr_nav15_13_68	179	111.2	0.5934	0.0077	0.0752	0.001	0.88085	0.05717	0.00039	0.057449	473.9	5.2	467.5	6.2	497	15	0.986495	0.621229	467.5	6.2		3.9	1.4	406	13	1.05	0.19	0.0097	0.0068	13.23	0.83	0.107	0.042	1.35	0.32	1.8	0.3	0.86	0.14	8.6	1.1	2.89	0.28	35	2.2	12.06	0.57	61.3	2.5
nrr_nav15_13_70	217.4	126.5	0.605	0.01	0.0755	0.0011	0.92212	0.05804	0.00038	-0.2892	480.1	6.5	469.4	6.5	531	14	0.977713	0.581877	469.4	6.5		3.3	2	396	20	1.6	0.21	0.0043	0.004	16.8	1	0.062	0.023	0.72	0.24	1.63	0.29	0.577	0.095	7.1	1.1	2.3	0.16	32.4	2.1	11.7	0.81	62.3	3.1
nrr_nav15_13_66	156.2	96.2	0.5889	0.0099	0.0756	0.0011	0.91308	0.05637	0.00033	-0.16076	470	6.4	470	6.8	467	13	1	0.615877	470	6.8		2.7	1.4	341	16	0.93	0.14	0.003	0.0033	12.87	0.8	0.046	0.022	0.79	0.18	1.5	0.31	0.586	0.099	6.93	0.68	2.23	0.22	28.9	2.1	9.89	0.66	51.9	3.4
nrr_nav15_13_71	188.5	126.2	0.5917	0.0098	0.076	0.0012	0.92186	0.05645	0.00027	0.075354	471.7	6.3	472.4	7	470	11	1.00148	0.669496	472.4	7		2.6	1.5	453	17	1.11	0.12	0.0049	0.0045	14.9	0.74	0.082	0.029	1.33	0.24	1.69	0.31	0.96	0.15	9.8	1.2	2.86	0.19	38.2	2.6	13.62	0.85	67.2	3.4
nrr_nav15_13_32	136	51.16	4.95	0.052	0.3351	0.0035	0.96634	0.10697	0.00029	0.1507	1810.5	9	1863	17	1748.3	4.9	1.029	0.376176	1748.3	4.9		6.2	1.7	1148	32	1.48	0.18	0.0124	0.0086	4.12	0.26	0.066	0.022	0.84	0.15	2.03	0.31	0.098	0.037	18	1.3	6.95	0.5	96.5	3.2	38.5	1.9	178.1	4.4
lead loss likely
nav15_13_13	624	391.6	0.5321	0.0033	0.06647	0.00036	-0.11376	0.05798	0.00053	0.6889	433.2	2.2	414.8	2.2	528	20	0.957525	0.627564	414.8	2.2		8.1	3.3	1429	49	5.58	0.53	0.189	0.055	38.3	1.8	0.41	0.068	7.8	1.6	5.51	0.72	5.5	0.71	25.5	2.5	8.74	0.64	128.9	9.3	41.7	1.9	200.6	7.9
nrr_nav15_13_69	297.5	226.5	0.55	0.01	0.06778	0.00066	0.86434	0.05888	0.00061	-0.48015	444.6	6.8	422.8	4	561	23	0.950967	0.761345	422.8	4		7.3	1.8	824	63	2.58	0.37	0.086	0.024	23.73	0.93	0.64	0.11	4.17	0.58	6	0.96	6.8	0.84	24.1	2.6	7.46	0.65	82.5	7	24.7	1.6	114.1	7.5
nav15_13_9	641	378	0.5533	0.0043	0.07069	0.00049	0.82255	0.05685	0.00026	0.36546	447.1	2.8	440.3	2.9	485	10	0.984791	0.589704	440.3	2.9		5.6	2.4	1295	77	5.96	0.89	0.51	0.26	40.2	3.7	0.38	0.13	6	1.6	3.58	0.78	3.78	0.35	20.9	1.8	7.66	0.51	110.2	8.5	38.5	3	183	15
nav15_13_21	285	237.7	0.5501	0.005	0.07114	0.0005	0.69148	0.05587	0.00036	0.12432	445	3.2	443	3	446	14	0.995506	0.834035	443	3		6.5	3.1	883	64	1.93	0.33	-0.015	0.031	23.3	1.6	0.087	0.031	3.64	0.79	2.61	0.52	1.64	0.33	13.6	2.2	5.22	0.73	73.8	6.6	27.4	3.2	130	11
nav15_13_2	246.2	175.3	0.5526	0.0044	0.07129	0.00035	0.4644	0.05648	0.00039	0.20652	446.6	2.9	443.9	2.1	471	15	0.993954	0.712023	443.9	2.1		1.7	2	577	19	1.15	0.25	0.017	0.025	18	1.2	0.064	0.03	1.86	0.54	1.34	0.36	0.72	0.19	11.5	1.1	3.38	0.5	49.4	2.5	17.81	0.86	79.8	4.3
discordant
nrr_nav15_13_18	447	563	0.66	0.039	0.0501	0.0014	0.90407	0.0945	0.0034	-0.69777	512	24	315.3	8.3	1503	68	0.61582	1.25951				30.6	2.9	2320	180	3.34	0.31	1.27	0.38	41.8	2	3.73	0.26	17.98	0.99	27.2	2.1	31.1	3	86.1	5.5	24.9	1.9	232	15	77.3	4.4	293	20
nrr_nav15_13_31	558	333.9	0.596	0.0056	0.06507	0.00049	0.61356	0.06644	0.00049	0.14751	474.6	3.6	406.4	3	820	15	0.8563	0.598387
nav15_13_24	579	607	0.8036	0.0077	0.067	0.0013	-0.61366	0.087	0.0026	0.95638	598.8	4.3	417.8	7.7	1351	56	0.697729	1.04836				7.3	2.8	1320	140	3.33	0.42	0.39	0.12	30.4	3	0.49	0.13	12.8	2.7	8.1	1.6	6.9	1.8	31.1	4.8	10.2	1.6	131	19	41.4	5.3	179	19
nrr_nav15_13_54	316	266.6	0.6206	0.0058	0.06702	0.0006	0.86001	0.0671	0.00039	0.17766	490.2	3.6	418.2	3.6	841	12	0.853121	0.843671				7.9	1.6	662	39	1.92	0.24	0.053	0.018	21	1.4	0.573	0.082	3.34	0.66	6.08	0.78	5.78	0.76	19.9	2.3	6.24	0.65	72	7.6	21.4	1.4	89.3	6.9
nav15_13_31	485	392	0.766	0.019	0.07138	0.00035	-0.17825	0.0769	0.002	0.34901	577	11	444.4	2.1	1120	51	0.770191	0.808247				5.1	2.6	833	50	3.94	0.39	0.2	0.12	30.8	1.8	0.273	0.081	4.8	1.2	2.54	0.55	2.79	0.49	15.3	1.8	4.76	0.56	74.7	6.1	24.6	1.9	125.5	5.5
nrr_nav15_13_15	308.2	250.7	0.711	0.011	0.0726	0.00061	-0.30657	0.0713	0.0015	0.64403	545.2	6.8	451.8	3.6	969	43	0.828687	0.813433				4.3	1.6	634	21	2.69	0.21	0.017	0.011	23.5	1.1	0.145	0.038	1.23	0.35	2.6	0.39	1.22	0.21	13.4	1.4	4.1	0.32	53.1	3	20.7	0.88	94.1	4.7
nrr_nav15_13_14	201	170	0.669	0.021	0.07433	0.0008	0.87832	0.0656	0.0015	-0.72921	519	13	462.2	4.8	795	46	0.890559	0.845771				13.3	1.5	544	30	1.59	0.24	43	12	318	90	51	14	127	34	23.3	5.6	2.95	0.6	33.8	4.3	6.29	0.32	60.1	2.5	18.53	0.96	75.5	4.2
nav15_13_4	749	399.5	2.848	0.037	0.08567	0.00058	0.69843	0.2419	0.0022	-0.066698	1367.8	9.8	529.9	3.5	3132	14	0.38741	0.533378				7.2	2.1	1380	54	4.22	0.57	0.214	0.069	24.9	1.5	0.583	0.089	11.1	1.5	6.35	0.85	9.4	0.57	34.9	2.7	10.4	0.71	141.1	6.7	42.5	1.8	178.4	9.6
nrr_nav15_13_9	548	315	4.59	0.38	0.1001	0.0035	0.96051	0.327	0.018	-0.91694	1726	73	615	20	3576	95	0.356315	0.574818				12.5	2.1	1340	130	4.91	0.59	0.086	0.023	34.8	3.8	1.07	0.21	5.4	1.2	8.8	1.1	8.4	1.2	31.6	3.5	10.8	1.2	133	14	43.7	3.9	191	18
NAV15-14
nav15_14_143	394	249	0.5493	0.008	0.07158	0.00093	0.94185	0.056	0.00026	-0.088372	445.3	5.1	445.7	5.6	452	10	1.0009	0.63198	445.7	5.6		5.2	1.4	587	80	1.69	0.16	4.7	2.3	33.3	3.3	1.25	0.37	7.5	2.1	5.3	1.7	3.7	1.4	21.4	6	6	1.3	59	13	18.3	2.9	83.3	8.9
nav15_14_76	415	276.5	0.5575	0.0054	0.07168	0.00068	0.8787	0.05653	0.00033	0.25938	450.5	3.7	446.3	4.1	473	13	0.990677	0.666265	446.3	4.1		6.3	2.3	664	21	2.29	0.22	-0.852	0.097	33.2	1.5	1.09	0.12	7.88	0.71	4.96	0.7	2.65	0.28	19.4	2	6.02	0.63	62.2	4.7	20.29	0.99	97.9	5.3
nav15_14_25	334	153	0.5529	0.0084	0.0717	0.0011	0.91623	0.05613	0.00039	0.33793	446.8	5.5	446.5	6.4	459	16	0.999329	0.458084	446.5	6.4		4.5	1.8	600	120	1.94	0.36	-0.29	0.16	29.2	6	1.39	0.84	6.1	3.3	6.7	3.3	2.9	1.4	16.6	6.7	5.6	2.1	54	15	18.1	4.3	89	14
nav15_14_61	403	353.9	0.6112	0.0054	0.07173	0.00065	0.82238	0.06107	0.00036	0.25024	484.2	3.4	446.6	3.9	641	13	0.922346	0.878164	446.6	3.9		6.7	2	1114	68	1.99	0.23	-0.446	0.074	32	1.9	0.9	0.16	7.6	1.2	9.2	1.2	4.69	0.71	35.8	4.3	10.9	1.1	111.5	7.8	33.9	2.3	162.9	7.5
nav15_14_147	414	315	0.561	0.013	0.0719	0.0015	0.98211	0.05682	0.00023	-0.1725	452	8.2	447.4	9	484.3	8.8	0.989823	0.76087	447.4	9		2.84	0.89	953	59	1.12	0.23	0.037	0.04	26.9	1.9	0.224	0.061	3.01	0.36	3.87	0.69	2.13	0.18	23.4	1.8	6.75	0.42	82.4	5.7	31	1.7	149.3	8.2
nav15_14_22	496	272	0.563	0.0053	0.07192	0.00058	0.91016	0.05671	0.00022	0.25328	453.4	3.5	447.7	3.5	479.9	8.4	0.987428	0.548387	447.7	3.5		9.6	2.5	974	78	3.3	0.36	-0.157	0.054	34.9	1.9	0.78	0.18	4.8	1	9.1	1.5	4.57	0.85	26.8	3.9	8.18	0.93	85.2	9.8	27.8	2.3	135.5	8.4
nav15_14_110	547	368	0.5575	0.008	0.07199	0.0009	0.97032	0.05634	0.00019	-0.4189	449.8	5.2	448.1	5.4	465.5	7.4	0.996221	0.672761	448.1	5.4		5.7	1.5	1067	91	3.57	0.64	-3.44	0.72	43.2	3.3	0.542	0.088	4.77	0.88	5.43	0.86	3.25	0.55	24.6	2.9	7.97	0.88	84.7	7.4	32.8	2.8	150	11
nav15_14_71	342	241.9	0.5818	0.0067	0.07213	0.0007	0.85834	0.05832	0.00033	-0.0042601	465.5	4.3	448.9	4.2	541	13	0.964339	0.70731	448.9	4.2		6.8	1.5	708	29	2.07	0.26	-0.24	0.072	26.9	1.2	0.455	0.055	3.93	0.73	4.85	0.72	2.54	0.36	22.7	2.1	7.17	0.69	71.1	5.6	22.9	1.2	103.2	4.6
nav15_14_156	423	237.8	0.5565	0.0064	0.07222	0.0007	0.91617	0.05624	0.00028	-0.10953	449.2	4.2	449.5	4.2	462	11	1.00067	0.562175	449.5	4.2		5.1	1.3	756	34	2.48	0.34	0.209	0.066	32.7	1.8	0.44	0.11	2.46	0.61	2.72	0.37	1.97	0.33	14.4	1.5	5.1	0.33	57.5	2.3	23	1.3	114.2	3.8
nav15_14_58	505	348.5	0.5595	0.0042	0.07224	0.00049	0.82892	0.05588	0.00025	0.036284	451.7	2.7	449.7	3	447	10	0.995572	0.690099	449.7	3		7.4	2	846	22	3.12	0.29	-0.147	0.038	37.7	1.6	0.243	0.054	2.37	0.48	3.21	0.64	1.57	0.18	16.5	1.6	5.66	0.31	66.9	3	27.7	1.6	127.5	4.8
nav15_14_19	424	226.1	0.5569	0.0053	0.07236	0.00049	0.90108	0.05576	0.00028	-0.34363	449.5	3.4	450.3	2.9	443	11	1.00178	0.533255	450.3	2.9		7.3	2.2	717	27	2.38	0.23	-0.15	0.038	29	1.4	0.458	0.091	2.72	0.4	4.31	0.64	2.13	0.33	16.5	2.2	4.77	0.4	54.6	3.5	20.3	1	103.8	3.7
nav15_14_98	540	378	0.5569	0.0073	0.07235	0.00085	0.96129	0.05633	0.00021	0.084621	450.3	5	450.3	5.1	465.2	8.3	1	0.7	450.3	5.1		5.5	2	932	84	3.26	0.33	-0.83	0.34	40.8	4.1	0.38	0.13	4.2	1.2	4.9	1.2	2.88	0.72	19.5	2.9	6.9	1.3	76	11	28.7	3.6	134	13
nav15_14_57	320.2	230	0.5726	0.006	0.07237	0.00065	0.8642	0.05686	0.00029	-0.015626	459.6	3.9	450.4	3.9	486	11	0.979983	0.718301	450.4	3.9		5.1	1.6	653	20	1.57	0.25	-0.006	0.013	24.5	1.5	0.143	0.033	2.05	0.38	3.43	0.55	1.41	0.17	17.5	1.8	5.66	0.43	60.5	3.1	22.49	0.93	99.4	3.8
nav15_14_125	307	175.4	0.5621	0.0056	0.07247	0.0007	0.87602	0.05635	0.00031	0.13069	452.8	3.7	451	4.2	466	12	0.996025	0.571336	451	4.2		4.2	1.4	545	19	2.28	0.18	0.47	0.24	22.3	1.4	0.145	0.057	1.7	0.45	2.69	0.68	1.3	0.3	10.9	1.4	3.31	0.38	44	2.9	16.9	1	85.6	4.2
nav15_14_146	422	356	0.5658	0.0085	0.07254	0.00097	0.92819	0.05675	0.00033	-0.21779	455.1	5.5	451.4	5.8	481	13	0.99187	0.843602	451.4	5.8		5.3	1.3	1071	57	1.75	0.29	5.7	4.6	32.8	4.7	1.18	0.55	6.7	1.9	7.07	0.94	3.03	0.33	29.8	3.2	9.4	1	97.5	8.4	35.7	2.6	155.8	9.5
nav15_14_95	378	294.3	0.5588	0.0057	0.07262	0.00067	0.89207	0.05624	0.00032	0.13139	450.7	3.7	451.9	4	462	12	1.00266	0.778571	451.9	4		4.8	1.3	1032	27	1.77	0.19	-0.153	0.037	27.2	2.1	0.257	0.052	3.66	0.62	5.91	0.63	2.6	0.31	27.7	2.1	8.75	0.79	90	3.7	32.4	1.2	154.4	7.9
nav15_14_2	175.4	88.8	0.5745	0.0055	0.07271	0.00059	0.71193	0.05782	0.0004	0.14268	461.4	3.4	452.4	3.5	522	15	0.980494	0.506271	452.4	3.5		4.6	1.5	253	10	1.02	0.23	-0.04	0.013	14.47	0.95	0.234	0.061	1.38	0.33	1.82	0.49	0.75	0.17	7.6	1.6	2.28	0.26	22	1.6	8.02	0.53	39.2	2.2
nav15_14_39	287	186.2	0.5663	0.0057	0.07271	0.00049	0.78006	0.05643	0.00036	-0.1107	455.6	3.7	452.5	2.9	469	14	0.993196	0.64878	452.5	2.9		5.7	2.1	762	28	1.23	0.2	-0.056	0.021	21.5	1.5	0.252	0.044	3.47	0.25	5.5	0.51	2.08	0.31	20.5	1.8	6.41	0.4	64.2	3	23.37	0.97	112	6
nav15_14_130	377	235	0.5666	0.0065	0.07279	0.00074	0.88564	0.05651	0.00027	-0.054564	455.7	4.2	452.9	4.5	472	11	0.993856	0.623342	452.9	4.5		5.5	1.5	510	19	2.21	0.2	0.055	0.054	25.41	0.98	0.066	0.024	0.92	0.28	1.71	0.53	0.7	0.12	7.9	1.1	2.72	0.28	39.1	2.4	14.98	0.86	76.7	3.5
nav15_14_132	400	218.1	0.5653	0.0056	0.07296	0.00059	0.90655	0.05586	0.00029	-0.17167	454.9	3.6	453.9	3.5	447	11	0.997802	0.54525	453.9	3.5		3.8	1.1	602	35	2.99	0.33	-0.003	0.04	30.9	2.1	0.077	0.036	0.67	0.23	2.36	0.56	0.9	0.17	8.5	1.1	3.37	0.31	42.4	2.9	18.3	1.2	93	6.3
nav15_14_83	467	317.9	0.5703	0.0046	0.073	0.00061	0.84925	0.0564	0.00027	0.29673	458.2	3	454.2	3.7	468	10	0.99127	0.680728	454.2	3.7		5.1	1.7	595	27	2.4	0.32	-0.114	0.058	31.9	1.2	0.176	0.03	2.04	0.35	3.61	0.56	1.77	0.24	16.2	1.7	4.84	0.36	53.7	2.7	20.62	0.88	88.9	3
nav15_14_44	511	378.8	0.5672	0.0049	0.07307	0.00051	0.9235	0.05602	0.00023	-0.39015	456.2	3.2	454.6	3.1	453	9.2	0.996493	0.741292	454.6	3.1		5.8	1.8	525	24	2.34	0.31	-0.059	0.022	33.6	1.7	0.265	0.064	1.95	0.54	3.62	0.67	1.34	0.25	13.2	1.8	4.26	0.43	41.2	3.2	16.4	0.8	76.2	4.7
nav15_14_168	395	199.5	0.5648	0.0076	0.0731	0.00084	0.95278	0.05611	0.00022	-0.23119	454.6	4.9	454.8	5	456.3	8.8	1.00044	0.505063	454.8	5		4.7	1.3	610	20	2.68	0.3	0.001	0.014	26.7	1.4	0.07	0.03	0.55	0.15	1.27	0.24	0.75	0.13	8.07	0.88	3.08	0.3	38.9	2.6	18.69	0.77	95.8	3.7
nav15_14_32	445	225.9	0.5874	0.0086	0.07324	0.00058	0.46989	0.05756	0.0006	0.06691	469.1	5.5	455.6	3.5	511	23	0.971221	0.50764	455.6	3.5		7.5	2.1	761	36	2.74	0.46	-0.02	0.016	28.2	1.8	0.094	0.04	1.45	0.47	3.02	0.53	1.95	0.26	13.4	2	5.49	0.51	59.1	2.3	22.7	1.2	116.6	3.9
nav15_14_133	369	190.8	0.5678	0.0053	0.07323	0.00063	0.88403	0.05625	0.00025	0.26032	456.5	3.4	455.6	3.8	462.1	9.8	0.998028	0.517073	455.6	3.8		4.8	1.1	609	27	2.61	0.25	0.22	0.08	27	1.6	0.146	0.062	1.14	0.18	2.22	0.38	0.89	0.17	10.44	0.88	3.61	0.37	43.3	2.7	18.18	0.77	98.9	4.3
nav15_14_40	217.2	96.4	0.5699	0.0057	0.07325	0.00052	0.5755	0.05611	0.00043	0.075482	457.9	3.7	455.7	3.1	456	17	0.995195	0.443831	455.7	3.1		4.1	1.3	386	16	1.24	0.27	-0.007	0.008	14	0.84	0.04	0.019	0.98	0.25	1.64	0.37	0.63	0.16	8.23	0.87	2.68	0.24	30.3	1.7	11.45	0.84	60.3	3.2
nav15_14_34	388	195.8	0.5706	0.0053	0.07329	0.00046	0.87593	0.05602	0.00022	-0.27086	458.3	3.4	456	2.7	452.9	8.8	0.994981	0.504639	456	2.7		3.9	1.3	520	19	1.83	0.18	-0.0068	0.0066	25.1	1.4	0.039	0.023	0.74	0.22	1.65	0.36	0.82	0.18	8.02	0.97	2.76	0.39	37.2	1.7	15.36	0.75	79	3.4
nav15_14_101	377	181.2	0.567	0.0074	0.07331	0.0008	0.91571	0.05644	0.00027	-0.21438	455.9	4.8	456.1	4.8	469	11	1.00044	0.480637	456.1	4.8		4.2	1.8	650	27	3.15	0.37	-0.037	0.042	23.43	0.99	0.052	0.026	1.05	0.25	1.97	0.33	0.84	0.18	11.8	1.2	3.89	0.35	48.2	2.6	20.4	1.2	101.3	3.7
nav15_14_87	345	236	0.566	0.013	0.0734	0.0016	0.97666	0.05658	0.00033	0.41264	455.1	8.8	456.2	9.4	475	13	1.00242	0.684058	456.2	9.4		6	2.4	920	250	1.9	0.3	-1.25	0.89	31.4	7.6	1.7	1.3	12.4	8.3	10.9	6.5	4.6	2.8	28	13	10.9	4.9	107	43	31.2	9.2	137	33
nav15_14_17	329	152.5	0.5731	0.005	0.07335	0.00051	0.76004	0.05616	0.00035	0.091617	460	3.2	456.3	3.1	458	14	0.991957	0.463526	456.3	3.1		5.6	2.2	364	14	1.31	0.22	0.0017	0.0072	21.8	1.2	0.06	0.024	0.54	0.27	1.22	0.37	0.55	0.1	5.9	1.1	2.22	0.29	26.4	1.6	10.43	0.62	56.3	2.8
nav15_14_116	293	145.1	0.5628	0.0055	0.07336	0.00066	0.92499	0.05585	0.00024	-0.16588	453.3	3.6	456.3	4	446.1	9.6	1.00662	0.495222	456.3	4		4.6	1.8	557	49	1.69	0.22	-9.2	4.1	19.8	1.6	0.27	0.14	2.3	1.2	2.81	0.94	1.32	0.65	11.3	3.2	3.74	0.68	42.9	5	17.1	1.8	76.9	4.4
nav15_14_104	257	138.1	0.565	0.007	0.07337	0.00087	0.88481	0.05619	0.00035	-0.044363	454.7	4.5	456.4	5.2	459	14	1.00374	0.537354	456.4	5.2		4.8	1.4	323	13	1.44	0.24	-0.3	0.12	18.8	1.6	0.128	0.029	0.92	0.2	1.53	0.41	0.65	0.1	7.4	1	2.43	0.25	26.9	1.8	10.2	0.69	47.6	2.3
nav15_14_107	460	257.3	0.5788	0.0072	0.07338	0.00071	0.71769	0.05771	0.00061	-0.012367	463.6	4.7	456.4	4.3	517	23	0.984469	0.559348	456.4	4.3		5.6	1.3	520	25	1.89	0.25	-1.07	0.31	26.3	1	0.296	0.042	2.77	0.63	3.16	0.53	2.08	0.28	14	1.5	4.3	0.4	43.8	3.1	16.13	0.97	73	3.1
nav15_14_140	199	100.5	0.5697	0.0066	0.07339	0.00071	0.83624	0.05651	0.00039	-0.10235	457.7	4.3	456.6	4.2	474	16	0.997597	0.505025	456.6	4.2		4.7	1.8	328	13	1.15	0.17	0.031	0.03	15.97	0.68	0.054	0.016	0.63	0.19	1.16	0.31	0.409	0.099	5.86	0.97	1.71	0.23	23.6	1.8	9.32	0.57	48.5	2.3
nav15_14_163	445	248.9	0.5665	0.0077	0.07341	0.00088	0.94031	0.05641	0.00024	-0.079417	455.6	5	456.6	5.3	468.1	9.3	1.00219	0.559326	456.6	5.3		2.8	1.2	485	23	1.71	0.28	0.016	0.017	26.1	1	0.093	0.037	0.88	0.24	1.33	0.27	0.89	0.13	8.3	1.1	2.74	0.3	36.9	3.5	15.24	0.93	76.6	5.1
nav15_14_1	396	204.1	0.5717	0.0049	0.07342	0.00053	0.88439	0.05698	0.00025	-0.03169	459.1	3.2	456.7	3.2	490.3	9.7	0.994772	0.515404	456.7	3.2		11.9	2.2	1197	57	2.84	0.33	-0.0037	0.0035	23.3	1.4	0.09	0.04	1.36	0.31	2.86	0.65	1.58	0.19	15.6	1.3	6.56	0.49	87.2	6.4	36	1.6	190.2	9.1
nav15_14_59	504	362.5	0.5712	0.0059	0.07341	0.00057	0.86252	0.05608	0.00029	-0.02629	459.3	3.7	456.7	3.4	455	11	0.994339	0.719246	456.7	3.4		4.4	1.8	629	29	2.09	0.22	-0.26	0.055	34.9	1.6	0.493	0.082	3.7	0.62	3.62	0.68	2.04	0.29	16.9	1.7	5.31	0.47	58.7	3	20.3	1.3	89.2	3.8
nav15_14_49	268	199	0.5742	0.0077	0.07346	0.00084	0.90389	0.05634	0.0003	-0.10937	460.6	5	456.9	5	468	12	0.991967	0.742537	456.9	5		4.2	2	618	59	0.93	0.18	-0.025	0.013	20.3	1.4	0.079	0.037	1.43	0.43	3.27	0.49	1.06	0.22	14.5	2	4.38	0.57	46	4.4	19.7	2.5	98	11
nav15_14_78	445	282	0.6006	0.0076	0.07344	0.00065	0.74932	0.05899	0.00047	0.06617	477.5	4.8	456.9	3.9	568	18	0.956859	0.633708	456.9	3.9		3	1.5	795	55	2.55	0.32	-0.004	0.013	31.8	1.8	0.092	0.036	1.53	0.33	2.47	0.56	1.07	0.13	15.2	2.1	4.75	0.59	60.4	5.2	23.4	1.7	131	11
nav15_14_172	342	273.6	0.5854	0.0095	0.07346	0.00078	0.77801	0.05793	0.00054	-0.21047	468.8	6.3	457	4.7	526	20	0.974829	0.8	457	4.7		5	1.4	683	25	1.96	0.27	6.8	3.2	48.4	8.2	3.2	1.1	10	3.1	5.24	0.82	2	0.27	19.6	1.7	5.18	0.55	55	3.3	22.6	1.5	96.9	5
nav15_14_111	566	392.2	0.5679	0.0069	0.0735	0.00082	0.93269	0.05635	0.00026	-0.049047	456.6	4.5	457.2	4.9	466	10	1.00131	0.692933	457.2	4.9		7.2	1.5	1010	34	3.4	0.32	-0.25	0.14	35.8	2.3	0.124	0.036	2.26	0.34	2.73	0.42	1.59	0.16	17.8	1.2	6.22	0.37	79.7	4.3	32.2	1.3	156.5	6.5
nav15_14_138	453	241.3	0.5692	0.006	0.07351	0.0007	0.89886	0.05606	0.00027	0.1005	457.4	3.9	457.2	4.2	454	11	0.999563	0.532671	457.2	4.2		4.1	1.6	560	22	2.57	0.32	-0.005	0.032	30.1	1.6	0.017	0.013	0.87	0.21	1.53	0.22	0.77	0.14	8.8	1.3	3.19	0.29	40.9	2.4	16.95	0.98	88.9	4.3
nav15_14_33	265	121.2	0.5749	0.0047	0.07355	0.00046	0.6326	0.05618	0.00035	0.046454	461.1	3.1	457.5	2.8	459	14	0.992193	0.457358	457.5	2.8		5.2	1.8	378	11	1.15	0.17	-0.0078	0.0048	17.8	1.1	0.039	0.013	0.64	0.18	1.21	0.36	0.48	0.11	6.74	0.85	2.15	0.18	28.1	2.4	11.33	0.68	60.7	2
nav15_14_144	332	200.5	0.5663	0.0064	0.07355	0.00066	0.89786	0.05589	0.00027	0.023098	455.5	4.1	457.5	4	447	11	1.00439	0.603916	457.5	4		4.9	1.4	635	43	1.57	0.28	0.02	0.028	21.5	1.6	0.084	0.039	1	0.3	2.47	0.37	0.96	0.17	12.6	1.6	3.59	0.48	49.3	4	19.1	1.3	93.3	6.3
nav15_14_6	599	397.8	0.5714	0.0049	0.07357	0.00058	0.86277	0.05663	0.00023	0.11329	458.9	3.2	457.6	3.5	477	9	0.997167	0.664107	457.6	3.5		5.7	2.1	550	13	2.61	0.31	-0.0011	0.0061	35.3	1.5	0.076	0.023	0.83	0.22	1.92	0.42	1.06	0.19	11.3	1.7	3.49	0.36	41.5	1.7	17.69	0.98	86.2	2.9
nav15_14_74	449	310	0.5819	0.0096	0.0736	0.0012	0.95086	0.05708	0.00033	0.06716	465.5	6.2	457.6	7.2	494	13	0.983029	0.690423	457.6	7.2		9.8	1.8	770	110	2.86	0.36	-0.282	0.08	28.8	1.7	0.157	0.045	1.74	0.42	2.9	1.1	1.27	0.5	14.7	2.3	5.4	1.1	68	12	25.2	3.8	124	14
nav15_14_169	367	186.9	0.5713	0.0065	0.07357	0.00087	0.94844	0.05658	0.00024	0.18021	458.8	4.2	457.6	5.2	474.9	9.3	0.997384	0.509264	457.6	5.2		3.1	1.4	596	20	2.41	0.33	0.023	0.016	26.4	1.3	0.067	0.027	0.78	0.21	1.65	0.43	0.71	0.17	7.92	0.85	3.02	0.28	41.2	3.2	18.53	0.88	94.9	5.7
nav15_14_48	465	289.1	0.5716	0.0037	0.07359	0.00052	0.8719	0.05605	0.00023	0.066065	459	2.4	457.8	3.1	455.4	9	0.997386	0.62172	457.8	3.1		8.5	1.4	745	29	3.07	0.32	-0.4	0.32	34.9	2.1	0.172	0.099	1.81	0.78	1.81	0.41	1.01	0.16	11.3	1.2	3.95	0.33	51.8	2.1	22.5	1.3	122.6	5.7
nav15_14_171	380	218.7	0.5691	0.0072	0.07361	0.00083	0.92714	0.05627	0.00027	-0.094225	457.3	4.7	457.8	5	463	11	1.00109	0.575526	457.8	5		4.9	1.5	453	19	2.05	0.25	0.0009	0.0089	27.3	1.3	0.099	0.042	0.74	0.24	1.4	0.24	0.69	0.15	6.81	0.73	2.65	0.27	32	2.8	13.79	0.68	69.9	2.1
nav15_14_54	234	151	0.5844	0.0078	0.07362	0.00068	0.80628	0.05692	0.00043	-0.082727	467.2	5	457.9	4.1	487	17	0.980094	0.645299	457.9	4.1		3.8	2.2	481	29	1.12	0.23	-19.1	5.8	75	16	4.9	1.5	20.6	5.6	4.6	1	1.67	0.33	12.9	1.9	3.48	0.4	37.8	3.1	15.2	1.1	74	4.7
nav15_14_89	528	349	0.5737	0.0065	0.07361	0.00077	0.94843	0.05659	0.00024	-0.27197	460.3	4.2	457.9	4.6	475.5	9.3	0.994786	0.660985	457.9	4.6		6.4	2	1030	84	3.51	0.32	-0.051	0.031	33.8	2.3	0.136	0.04	2.09	0.48	3.6	0.67	1.7	0.28	18.9	2.5	6.37	0.62	75.1	6.2	31.4	2.2	158	11
nav15_14_9	212.7	84.2	0.5794	0.0041	0.07365	0.00047	0.78077	0.05691	0.00026	0.070464	464	2.6	458.1	2.8	488	10	0.987284	0.395863	458.1	2.8		16.2	2.5	799	30	1.84	0.28	-0.0088	0.0058	17.69	0.58	0.144	0.044	1.75	0.3	2.98	0.5	0.84	0.15	18.1	1.4	5.87	0.27	71.4	3.5	27.8	1.6	126.4	5.7
nav15_14_70	272	135	0.5702	0.007	0.07372	0.0007	0.86358	0.05581	0.00032	-0.041465	458.1	4.5	458.5	4.2	444	13	1.00087	0.496324	458.5	4.2		4.4	1.9	441	19	1.75	0.28	-0.007	0.01	18.95	0.79	0.038	0.018	0.78	0.27	1.18	0.29	0.51	0.12	7.11	0.95	2.55	0.27	31.9	2.1	13.75	0.63	75.4	3.2
nav15_14_142	264.1	124.5	0.5684	0.0062	0.07372	0.00066	0.77506	0.0563	0.00038	0.048157	456.9	4	458.5	4	464	15	1.0035	0.471412	458.5	4		4.3	1.1	397	13	1.91	0.24	14	12	35	14	1.7	1.5	5.9	4.6	2.08	0.76	0.9	0.16	7.8	1.1	2.54	0.22	28.1	2	11.54	0.64	60.2	3.5
nav15_14_60	227	104	0.5743	0.0058	0.07375	0.00055	0.81722	0.05626	0.0003	-0.09197	461.3	3.6	458.7	3.3	462	12	0.994364	0.45815	458.7	3.3		4.1	1.8	367	12	1.35	0.25	-0.0105	0.0099	16.25	0.72	0.031	0.017	0.44	0.17	1.24	0.25	0.49	0.13	7.53	0.8	2.13	0.16	29.4	2.2	11.36	0.59	58	2.8
nav15_14_85	384	206.2	0.5695	0.0066	0.07374	0.00068	0.89854	0.05593	0.00028	-0.10018	457.6	4.3	458.7	4.1	449	11	1.0024	0.536979	458.7	4.1		4.6	1.8	559	23	2.13	0.26	0.0027	0.0089	26.71	0.9	0.044	0.029	0.64	0.24	1.32	0.26	0.78	0.2	9.05	0.88	3.17	0.41	38.4	1.9	16.3	1	83.1	5.7
nav15_14_118	315	185.7	0.5744	0.0081	0.07375	0.00099	0.9479	0.05631	0.00028	-0.24212	460.7	5.2	458.7	5.9	464	11	0.995659	0.589524	458.7	5.9		2.3	1.2	398	15	2.27	0.26	440	150	37.9	4.3	1.01	0.35	5.4	1.7	2.86	0.6	0.59	0.1	10.3	1.1	2.72	0.27	33.5	2.2	12.44	0.63	58.8	2.5
nav15_14_129	349	212.4	0.5743	0.006	0.07375	0.00075	0.87542	0.05646	0.00033	-0.04018	461.5	4.1	458.7	4.5	472	13	0.993933	0.608596	458.7	4.5		3.7	1.4	541	23	2.07	0.27	0.066	0.052	24	1.4	0.051	0.024	0.67	0.2	1.91	0.4	0.72	0.13	7.91	0.95	2.98	0.31	41.6	2.3	16.26	0.71	81.7	3.8
nav15_14_149	368	218.9	0.5648	0.0076	0.07375	0.00098	0.94139	0.05582	0.00024	-0.067902	454.5	5	458.7	5.9	445	9.6	1.00924	0.594837	458.7	5.9		5.1	1.3	698	23	2.36	0.28	0.0062	0.0085	26.43	0.87	0.11	0.041	1.42	0.3	2.11	0.4	1.27	0.21	12.8	1.3	3.68	0.35	47.7	4	20.27	0.89	107.7	4.4
nav15_14_29	643	301	0.5716	0.0042	0.07377	0.0005	0.79115	0.05599	0.00029	0.28143	459	2.7	458.8	3	452	12	0.999564	0.468118	458.8	3		6.7	2.1	943	60	4.04	0.42	0.0039	0.0074	40.5	3.6	0.058	0.025	1.09	0.31	3.12	0.45	1.1	0.2	12.7	1.7	5.17	0.48	66.5	3.9	27	2.3	146.3	9
nav15_14_176	471	247.8	0.577	0.0046	0.07377	0.00051	0.82147	0.05662	0.00027	0.10457	462.5	2.9	458.8	3.1	476	11	0.992	0.526115	458.8	3.1		5	1.5	720	33	2.64	0.31	-1.57	0.45	33.9	2.2	0.328	0.092	3.95	0.99	3.4	0.64	1.85	0.33	14.8	2.2	4.89	0.58	62	4.3	23.4	1.2	111.2	6.2
nav15_14_20	450	213	0.571	0.0046	0.07382	0.0005	0.84553	0.05606	0.00028	0.0086616	458.6	3	459.1	3	454	11	1.00109	0.473333	459.1	3		5.1	1.8	574	20	2.12	0.25	-0.007	0.013	27.1	2	0.081	0.038	0.99	0.3	2.51	0.59	1.03	0.17	10.3	1.4	3.44	0.31	43	2.9	16.99	0.74	95.7	5
nav15_14_160	385	180.3	0.5693	0.0074	0.07383	0.00077	0.94546	0.05621	0.00027	0.10338	457.5	4.8	459.1	4.6	460	11	1.0035	0.468312	459.1	4.6		5.5	1.6	599	24	2.58	0.38	-0.0157	0.0076	24.6	1.5	0.049	0.037	0.54	0.19	1.11	0.23	0.72	0.17	7.99	0.91	3.01	0.38	40.8	2.2	18.2	1.1	89.9	4.8
nav15_14_94	248	117.8	0.572	0.0064	0.07383	0.00064	0.80729	0.05616	0.00028	0.10872	459.2	4.1	459.2	3.9	458	11	1	0.475	459.2	3.9		4.2	1.4	370	12	1.62	0.25	-0.032	0.031	17.1	1	0.03	0.013	0.55	0.14	1.1	0.29	0.54	0.12	5.28	0.7	2.02	0.26	25.5	1.6	11.4	0.47	60.1	3.2
nav15_14_151	157.8	57.9	0.5703	0.0067	0.07385	0.00077	0.7784	0.05623	0.00036	0.18695	458.1	4.4	459.3	4.6	467	14	1.00262	0.36692	459.3	4.6		6.9	2.5	621	19	2.51	0.26	-0.0061	0.0092	16.99	0.94	0.056	0.024	0.65	0.2	1.53	0.28	0.38	0.12	11.87	0.94	3.77	0.36	49.4	2.2	20.64	0.94	97.1	4.5
nav15_14_67	333	198.9	0.571	0.0051	0.07388	0.00052	0.75264	0.05589	0.00031	0.24132	458.6	3.3	459.5	3.1	450	13	1.00196	0.597297	459.5	3.1		2.7	1.5	388	21	1.32	0.15	-0.049	0.025	22.8	1.2	0.105	0.041	0.98	0.22	1.49	0.37	0.76	0.17	8.3	1.3	2.55	0.26	30.8	2.4	11.93	0.67	62.8	2.2
nav15_14_27	343	184.5	0.5727	0.0049	0.07391	0.00044	0.79178	0.05615	0.0003	-0.063591	459.7	3.2	459.6	2.6	460	12	0.999782	0.537901	459.6	2.6		3.7	1.1	665	24	1.26	0.23	0.0049	0.0073	20.7	1	0.12	0.036	1.15	0.23	3.02	0.54	1.11	0.17	14.2	1.5	4.33	0.47	51.5	2.9	19.58	0.91	104	3.3
nav15_14_63	609	382	0.5751	0.0045	0.07392	0.00058	0.87692	0.05606	0.00025	0.16371	461.3	2.9	459.7	3.5	454.4	9.7	0.996532	0.627258	459.7	3.5		4.4	1.5	598	23	2.46	0.26	-0.015	0.015	35.1	1.4	0.074	0.028	0.84	0.23	1.9	0.4	0.73	0.15	10.2	1.1	3.51	0.41	47.9	2	18.47	0.93	95.7	3.8
nav15_14_82	341	185.2	0.5821	0.0085	0.0739	0.0011	0.90488	0.05697	0.00037	0.011665	465.7	5.4	459.7	6.3	490	14	0.987116	0.543109	459.7	6.3		23.3	4	371	14	1.84	0.28	0.013	0.016	20.78	0.98	0.052	0.017	0.72	0.23	1.11	0.27	0.59	0.12	6.83	0.94	2.46	0.23	27.9	1.8	10.69	0.54	52	3.1
nav15_14_43	318	165.9	0.5743	0.0046	0.07393	0.00041	0.65189	0.05612	0.0003	0.14104	461.2	2.9	459.8	2.4	457	12	0.996964	0.521698	459.8	2.4		5.7	1.7	536	18	1.85	0.21	-0.005	0.011	24	1.2	0.042	0.026	0.79	0.25	1.79	0.42	0.59	0.14	8.3	1.3	2.85	0.33	35.7	2.4	16.39	0.9	84.3	4
nav15_14_69	307	197.4	0.5738	0.0057	0.07393	0.0006	0.82428	0.05595	0.00031	-0.013792	460.4	3.7	459.8	3.6	450	12	0.998697	0.642997	459.8	3.6		5.1	1.1	316	13	1.15	0.2	-0.004	0.013	18.5	1.1	0.044	0.024	0.74	0.2	1.18	0.3	0.48	0.13	6.65	0.97	2.1	0.23	26.9	2.2	9.87	0.45	51.6	2.3
nav15_14_100	261.1	138	0.5695	0.0046	0.07395	0.00059	0.81904	0.05605	0.00032	0.064074	457.7	2.9	459.9	3.6	456	13	1.00481	0.528533	459.9	3.6		6.6	1.4	374	13	1.34	0.24	-0.034	0.037	19.4	1.1	0.039	0.015	0.49	0.12	1.16	0.3	0.533	0.094	7	1.1	2.17	0.26	27.1	1.7	11	0.64	56.2	2.3
nav15_14_28	331	138.8	0.5698	0.0043	0.07397	0.00057	0.76748	0.0557	0.0003	0.32866	457.8	2.8	460	3.4	440	12	1.00481	0.419335	460	3.4		4.5	1.4	548	24	1.84	0.24	0.0083	0.0048	20.64	0.73	0.065	0.031	0.68	0.24	1.81	0.43	0.55	0.15	7.6	1.3	2.63	0.3	36.6	1.7	15.64	0.95	87.6	5.4
nav15_14_68	382	204.3	0.5722	0.0048	0.07396	0.00049	0.85085	0.05587	0.00025	0.032988	459.4	3.1	460	3	447	10	1.00131	0.534817	460	3		5.7	2.2	596	30	2.52	0.24	-0.023	0.014	25.6	1.3	0.075	0.026	0.87	0.25	2.13	0.35	0.69	0.15	9.2	1	3.33	0.33	45.8	3.2	18	1	98	4.3
nav15_14_18	225.5	101.51	0.5734	0.0056	0.07398	0.00047	0.80464	0.05598	0.00038	-0.31977	460.2	3.6	460.1	2.8	454	14	0.999783	0.450155	460.1	2.8		6.1	1.8	378	16	1.17	0.14	0.0015	0.0065	16.32	0.92	0.029	0.013	0.3	0.15	1.27	0.39	0.57	0.12	6.3	1.3	1.97	0.25	25.1	1.8	10.69	0.68	60	3.1
nav15_14_53	354	197.9	0.5761	0.0049	0.074	0.00047	0.79196	0.05589	0.00029	0.13125	461.9	3.1	460.2	2.8	448	11	0.99632	0.55904	460.2	2.8		7.1	1.3	522	16	2.03	0.3	-0.025	0.02	24.9	1.1	0.035	0.022	0.52	0.17	1.36	0.35	0.5	0.11	7.7	0.88	3.09	0.31	36.9	2.1	15.69	0.86	81.4	3.1
nav15_14_128	300.6	166	0.575	0.0065	0.07399	0.0008	0.91043	0.05611	0.00026	-0.12865	461.2	4.2	460.2	4.8	456	10	0.997832	0.552229	460.2	4.8		3.1	1.1	514	36	2.07	0.3	0.41	0.26	24.88	0.87	0.119	0.055	1.31	0.39	2.12	0.49	1.1	0.22	10	1.5	3.22	0.32	40.4	2.8	15.4	1.1	83.6	4.4
nav15_14_122	447	249.4	0.5708	0.0055	0.07404	0.00061	0.90457	0.05601	0.00026	0.10875	458.5	3.6	460.4	3.7	452	10	1.00414	0.557942	460.4	3.7		2.9	2	715	27	3.69	0.36	-0.079	0.063	32.1	2	0.07	0.023	0.86	0.2	1.85	0.49	0.84	0.12	10.6	1.2	3.38	0.31	49.6	3.2	22.3	1.5	111.1	5.3
nav15_14_141	241.8	119.7	0.5715	0.0078	0.07404	0.00086	0.91953	0.05609	0.00029	-0.24269	458.8	5	460.4	5.1	455	11	1.00349	0.495037	460.4	5.1		5.1	1.8	428	21	1.73	0.23	0.024	0.037	18.05	0.73	0.037	0.028	0.61	0.21	1.11	0.36	0.52	0.12	6.3	1	2.27	0.23	30	2.1	12.1	0.86	65.6	4.6
nav15_14_52	446	289.9	0.5778	0.0046	0.07405	0.00054	0.84792	0.05617	0.00024	0.00685	463	3	460.5	3.2	458.8	9.4	0.9946	0.65	460.5	3.2		3.8	1.6	561	18	2.65	0.28	-0.018	0.012	30.4	1.5	0.034	0.033	0.76	0.27	1.4	0.4	0.71	0.12	9.5	1.6	3.14	0.18	40.9	2.7	18	1.1	88.9	5.8
nav15_14_152	362	194.7	0.5749	0.0064	0.07407	0.00075	0.93684	0.0564	0.00024	-0.148	461.1	4.1	460.6	4.5	467.8	9.6	0.998916	0.537845	460.6	4.5		3.9	1.9	656	31	2.7	0.34	0.032	0.027	25.27	0.8	0.076	0.029	1.05	0.29	1.84	0.35	0.82	0.14	9.6	1.4	3.62	0.32	45.6	2.7	19.6	1.1	103.7	3.8
nav15_14_73	306	175.2	0.5761	0.0082	0.07408	0.00095	0.88494	0.05626	0.00039	-0.039741	461.8	5.3	460.7	5.7	462	15	0.997618	0.572549	460.7	5.7		5.5	2.3	370	15	1.55	0.22	-0.003	0.022	21	1	0.045	0.024	0.71	0.16	1.18	0.27	0.54	0.11	6.04	0.67	2.1	0.22	29.4	2.2	11.64	0.75	62.3	3.4
nav15_14_75	447	267.7	0.5744	0.0052	0.07408	0.00061	0.89155	0.05607	0.00024	0.068294	460.8	3.4	460.7	3.7	456.5	9.1	0.999783	0.598881	460.7	3.7		5.5	1.9	541	17	2.5	0.29	-0.008	0.015	29.7	1.3	0.062	0.026	0.88	0.22	1.43	0.32	0.67	0.15	10.2	1.2	3.25	0.32	42.6	2	17.02	0.6	90.8	3.4
nav15_14_26	469	235.7	0.5734	0.0057	0.07409	0.00053	0.85712	0.05598	0.00025	-0.1849	460.2	3.7	460.8	3.2	453	10	1.0013	0.502559	460.8	3.2		4.2	2	488	25	1.85	0.24	-0.007	0.011	26.3	1.2	0.072	0.03	1.03	0.31	2.01	0.45	0.79	0.17	8.8	1.1	2.93	0.31	36.2	3.5	13.5	0.75	74	4.1
nav15_14_55	416	245.8	0.5743	0.0051	0.0741	0.00067	0.88058	0.05589	0.00028	0.024548	460.8	3.3	460.8	4	448	11	1	0.590865	460.8	4		5.8	1.9	511	24	2.12	0.31	-0.0057	0.0089	30.1	2	0.07	0.033	0.85	0.22	1.6	0.39	0.66	0.11	9.87	0.84	3.05	0.33	38.4	2.3	15.5	1.1	83.8	3.5
nav15_14_161	240	110.1	0.5801	0.0072	0.07411	0.0008	0.86229	0.05662	0.00036	-0.028146	464.4	4.6	460.8	4.8	476	14	0.992248	0.45875	460.8	4.8		2.8	1.5	417	25	1.16	0.2	0.143	0.05	17.2	1.1	0.274	0.058	1.72	0.39	2	0.42	1.37	0.21	9.2	1.3	2.9	0.37	36	2.8	12.6	1	60.5	4.5
nav15_14_77	265.3	130.9	0.581	0.0068	0.07413	0.00064	0.8864	0.05637	0.00034	-0.085426	465	4.4	461	3.9	468	13	0.991398	0.493404	461	3.9		3.7	1.9	404	14	1.53	0.19	-0.014	0.022	18.68	0.76	0.032	0.015	0.52	0.25	1.12	0.24	0.467	0.068	6.6	1.1	2.41	0.16	29.1	1.9	11.8	0.83	64.1	3
nav15_14_14	365	169.5	0.5742	0.0046	0.07415	0.00058	0.76921	0.05609	0.0003	0.29356	460.7	2.9	461.1	3.5	456	12	1.00087	0.464384	461.1	3.5		4.2	1.2	568	28	2.58	0.3	-0.0002	0.0026	23.42	0.87	0.075	0.041	1.04	0.23	1.77	0.41	0.69	0.13	9.3	1.4	3.29	0.24	43.3	3.1	16.19	0.88	86.2	3.8
nav15_14_102	409	234.8	0.5699	0.0057	0.07415	0.00053	0.86034	0.05608	0.00028	-0.11803	457.9	3.7	461.1	3.2	455	11	1.00699	0.574083	461.1	3.2		2.96	0.96	408	15	2.07	0.25	-0.098	0.065	25.8	1.2	0.021	0.014	0.63	0.25	1.1	0.31	0.45	0.12	7.5	1	2.32	0.23	28.9	2	12.37	0.53	61.2	2.9
nav15_14_108	291	145.5	0.5737	0.0057	0.07416	0.00066	0.91444	0.0563	0.00027	-0.15575	460.3	3.7	461.1	3.9	464	11	1.00174	0.5	461.1	3.9		4.8	1.6	332	15	1.38	0.14	0.003	0.06	20.68	0.98	0.0061	0.0087	0.4	0.15	0.7	0.21	0.43	0.1	5.83	0.68	1.91	0.19	22.4	1.2	9.65	0.52	49.5	1.8
nav15_14_23	154.4	99.46	0.5719	0.0078	0.07417	0.00065	0.71428	0.0559	0.00055	-0.13198	459.9	5.2	461.2	3.9	451	23	1.00283	0.644171	461.2	3.9		16.2	2.6	484	17	1.96	0.24	0.006	0.0051	28.8	1.3	0.092	0.036	1.56	0.32	4.5	1	0.97	0.16	14.9	1.5	4.07	0.33	46.1	3	15.1	0.95	71.5	4.2
nav15_14_31	401	175.6	0.5758	0.0058	0.07417	0.00064	0.84982	0.056	0.0003	-0.026976	461.7	3.7	461.2	3.8	452	12	0.998917	0.437905	461.2	3.8		2	1.5	424	15	1.52	0.23	-0.0075	0.0064	23.2	1.3	0.057	0.022	0.71	0.25	1.43	0.41	0.58	0.12	8	1.3	2.48	0.31	28.3	1.9	12.9	1.1	66.4	3.2
nav15_14_153	559	382.9	0.5725	0.0058	0.07417	0.00074	0.9073	0.05645	0.00024	-0.041758	459.5	3.7	461.2	4.5	469.6	9.5	1.0037	0.684973	461.2	4.5		3.7	1.1	694	25	3.17	0.34	0.019	0.017	40	1.8	0.057	0.03	1.11	0.15	1.84	0.37	0.94	0.13	11.78	0.91	3.66	0.2	49	2.3	20.15	0.87	102	5.3
nav15_14_154	415	286	0.5684	0.0077	0.07416	0.00083	0.93502	0.05591	0.00028	-0.20589	456.8	5	461.2	5	448	11	1.00963	0.689157	461.2	5		4.5	1.7	888	55	1.26	0.22	-0.004	0.015	25.8	1.4	0.177	0.06	2.14	0.44	3.54	0.55	1.92	0.25	19.1	2.6	5.77	0.55	72	5.8	26.3	1.6	134.8	9.3
nav15_14_148	399	202.6	0.5742	0.0067	0.07418	0.00082	0.92742	0.05641	0.00028	-0.072639	460.7	4.3	461.3	4.9	468	11	1.0013	0.507769	461.3	4.9		4	1.5	375	23	1.74	0.21	-0.01	0.018	24.5	1.7	0.061	0.04	0.58	0.21	0.79	0.33	0.67	0.14	5.55	0.92	2.08	0.28	27.2	2.8	11.44	0.71	59.3	3.7
nav15_14_30	468	288	0.5717	0.006	0.07427	0.0006	0.82456	0.05581	0.00035	-0.03502	459.7	4	461.8	3.6	444	14	1.00457	0.615385	461.8	3.6		3.3	1.5	977	76	1.25	0.26	-0.0105	0.0088	28.5	1.6	0.105	0.029	2.49	0.35	4.65	0.81	1.68	0.2	20.5	2.8	6.9	1	78.3	5.1	29.4	2.5	145.8	9.7
nav15_14_35	172	145.5	0.582	0.0068	0.07427	0.00066	0.72148	0.05651	0.00046	-0.11463	465.6	4.4	461.8	3.9	475	17	0.991838	0.84593	461.8	3.9		21.8	3.5	765	43	1.09	0.19	-0.0007	0.0083	20.4	1.1	0.276	0.041	4.63	0.86	6.5	1	1.79	0.26	27.7	2.4	7.46	0.77	74.4	5.4	25.1	1.8	104.8	6.6
nav15_14_79	386	222.8	0.5781	0.0055	0.07427	0.00065	0.93347	0.05618	0.0002	-0.047534	463.2	3.5	461.8	3.9	459.1	7.8	0.996978	0.577202	461.8	3.9		5	1.9	413	13	1.9	0.24	-0.028	0.024	24.99	0.72	0.029	0.022	0.79	0.21	1.25	0.28	0.6	0.14	7.4	1.2	2.57	0.31	31.4	1.3	13.11	0.91	66.5	2.8
nav15_14_80	321	176.3	0.581	0.0067	0.07428	0.00068	0.88671	0.05654	0.00031	-0.10721	465	4.3	461.9	4.1	473	12	0.993333	0.549221	461.9	4.1		6.3	1.6	356	16	1.46	0.28	-0.51	0.25	21.75	0.82	0.075	0.038	0.67	0.25	1	0.25	0.65	0.13	6.73	0.94	2.36	0.31	26.6	1.7	10.76	0.59	56.8	3.4
nav15_14_24	458	215.3	0.5891	0.0054	0.07432	0.00056	0.83469	0.05722	0.00025	-0.024654	470.3	3.4	462.1	3.4	499.9	9.6	0.982564	0.470087	462.1	3.4		5.3	1.6	443	16	1.76	0.24	-22.8	3	123	11	10.7	1.4	32.1	3.6	7.1	1.1	1.42	0.19	10.6	1.4	2.66	0.24	31	1.9	12.71	0.69	70	3.4
nav15_14_105	338	167.9	0.5711	0.0061	0.07432	0.00069	0.88557	0.05609	0.00027	0.034636	458.7	3.9	462.1	4.1	456	11	1.00741	0.496746	462.1	4.1		3	1.7	505	23	2.25	0.37	-0.012	0.051	23.9	1.1	0.025	0.012	0.5	0.21	0.91	0.22	0.55	0.12	8.5	1.1	2.62	0.28	35.9	2.1	16.08	0.76	78.8	4.7
nav15_14_131	292	134.3	0.5761	0.0059	0.07433	0.00075	0.89522	0.05605	0.00034	-0.0071274	461.9	3.8	462.2	4.5	454	14	1.00065	0.459932	462.2	4.5		3.8	1.5	470	21	2.53	0.28	0.013	0.06	21.35	0.98	0.028	0.023	0.7	0.16	1.07	0.25	0.54	0.14	7.4	1	2.42	0.21	34.8	2.5	14.1	1	76.1	3.5
nav15_14_135	409	174.1	0.572	0.0069	0.07433	0.00079	0.95156	0.05631	0.00026	-0.34642	459.2	4.5	462.2	4.7	464	10	1.00653	0.425672	462.2	4.7		5	1.6	598	21	2.76	0.32	-0.042	0.011	25.2	1.4	0.028	0.017	0.72	0.22	1.69	0.42	0.67	0.15	8.8	1.2	2.97	0.25	42.5	1.8	17.71	0.86	91.9	3.8
nav15_14_115	387	185.5	0.5721	0.0059	0.0744	0.00066	0.87639	0.05584	0.00028	-0.015943	459.3	3.8	462.6	3.9	448	11	1.00718	0.479328	462.6	3.9		5.1	1.7	583	33	2.79	0.49	0.21	0.38	27.7	1.8	0.036	0.016	0.67	0.3	1.43	0.34	0.7	0.14	8.1	1	3.04	0.28	40.2	2.8	17.6	1.7	96.1	5.5
nav15_14_65	234	123.7	0.58	0.0082	0.07433	0.00076	0.88286	0.0562	0.00036	-0.3338	464.3	5.3	462.9	4.4	459	14	0.996985	0.528632	462.9	4.4		7	1.3	374	15	1.43	0.2	0	0.011	17.19	0.89	0.033	0.02	0.7	0.2	0.64	0.21	0.42	0.11	6.1	1.1	2	0.25	30	1.3	11.54	0.71	64.7	4
nav15_14_37	229	106.2	0.5815	0.0063	0.07451	0.00065	0.74346	0.05652	0.00036	0.097424	465.9	3.9	463.2	3.9	472	14	0.994205	0.463755	463.2	3.9		4.7	1.8	403	30	1.33	0.24	-0.0012	0.0071	17.09	0.86	0.065	0.031	0.56	0.21	1.06	0.24	0.52	0.11	6.2	1.1	2.17	0.31	27.1	2.3	11.3	1	61.6	6.3
nav15_14_84	380	207.3	0.5768	0.006	0.07451	0.00071	0.8726	0.05607	0.00025	0.022764	462.3	3.9	463.2	4.2	455	10	1.00195	0.545526	463.2	4.2		6.3	1.7	553	29	1.94	0.21	-0.242	0.082	25.8	1.8	0.259	0.055	2.76	0.6	3.89	0.58	1.41	0.32	15.2	1.6	4.89	0.55	50.5	3.2	18.2	1.3	88.4	6.3
nav15_14_5	483	296	0.5937	0.0056	0.07455	0.00048	0.46032	0.05804	0.00041	-0.30764	473.2	3.5	463.5	2.9	530	15	0.979501	0.612836	463.5	2.9		8.7	2.4	568	24	2.27	0.28	-0.019	0.011	29.8	1	0.175	0.063	0.89	0.26	1.99	0.6	1.08	0.22	11.7	2.1	3.55	0.31	44.9	2.9	17.3	1.4	94.6	5.8
nav15_14_56	220	128.1	0.5772	0.0065	0.07455	0.00071	0.80844	0.05587	0.00038	0.084812	462.6	4.2	463.5	4.3	446	15	1.00195	0.582273	463.5	4.3		5.2	1.8	718	48	2.29	0.26	-0.01	0.015	22	1.3	0.044	0.022	0.84	0.2	1.93	0.45	0.62	0.16	11.18	0.9	4.19	0.42	51.9	4.1	21.8	1.8	115	11
nav15_14_162	382	233.2	0.5747	0.0069	0.07456	0.00083	0.94285	0.05638	0.00021	-0.13708	460.9	4.4	463.5	5	467	8.4	1.00564	0.610471	463.5	5		2.9	1.5	744	31	1.53	0.23	0.017	0.016	23.1	1.3	0.104	0.045	1.53	0.29	2.29	0.45	1.38	0.23	14.6	1.3	4.41	0.32	53.1	3.6	23.1	1.3	110.5	5.6
nav15_14_46	350	259.3	0.5803	0.0058	0.07456	0.00054	0.87351	0.05596	0.00031	-0.17173	464.6	3.7	463.6	3.3	450	12	0.997848	0.740857	463.6	3.3		4.6	2.4	793	34	0.97	0.15	-0.0055	0.0064	26.3	1.7	0.105	0.035	1.59	0.32	3.25	0.61	1.32	0.18	17.5	1.5	5.58	0.61	62	4.4	24.4	1.8	119.2	6.5
nav15_14_62	248.8	131.4	0.616	0.011	0.07457	0.00081	0.78915	0.05909	0.00067	-0.27441	487.2	7.1	463.6	4.8	572	24	0.95156	0.528135	463.6	4.8		9.7	2.8	439	24	1.95	0.19	-0.41	0.16	17.61	0.95	0.126	0.042	0.74	0.26	1.48	0.3	0.52	0.15	8.5	1	2.69	0.25	35	2.2	12.57	0.84	66.8	4.6
nav15_14_136	267	120.2	0.58	0.0064	0.07457	0.00069	0.86198	0.05648	0.00031	-0.0054946	464.4	4.1	463.6	4.1	471	12	0.998277	0.450187	463.6	4.1		3	1.7	429	23	1.75	0.21	1.9	1.8	20.3	2.1	0.21	0.15	1.32	0.57	1.52	0.41	0.644	0.07	7.8	1.2	2.24	0.24	32	2.1	14.08	0.83	69	2.8
nav15_14_88	390	263.5	0.5771	0.0051	0.07461	0.00049	0.86839	0.05597	0.00029	0.21055	462.5	3.3	463.9	2.9	451	11	1.00303	0.675641	463.9	2.9		5.6	2.2	458	20	1.77	0.16	-0.018	0.026	25.2	1.1	0.05	0.032	0.96	0.28	1.24	0.28	0.78	0.15	9.36	0.9	2.7	0.31	32	1.4	13.77	0.91	67.9	3.4
nav15_14_139	236	100.1	0.5842	0.0061	0.07464	0.00069	0.78692	0.05636	0.00036	0.23585	467.1	3.9	464	4.1	466	14	0.993363	0.424153	464	4.1		3.76	0.89	390	33	1.88	0.28	0.017	0.033	16.6	1	0.064	0.027	0.6	0.21	1.28	0.32	0.65	0.1	7.2	1.2	2.18	0.31	31.1	2.2	12.01	0.67	62.7	4
nav15_14_173	270	77	0.582	0.02	0.0747	0.0023	0.95359	0.05711	0.00054	-0.24018	465	13	464	14	495	21	0.997849	0.285185	464	14		1.1	1.1	510	510	2.7	2.7	-0.0029	-0.0029	27	27	0.17	0.17	0.91	0.91	0.25	0.25	1	1	6.8	6.8	2.7	2.7	33	33	13	13	83	83
nav15_14_8	460	280.3	0.5825	0.0053	0.07467	0.00056	0.87712	0.05673	0.00029	-0.023709	466	3.4	464.2	3.4	481	11	0.996137	0.609348	464.2	3.4		7.1	2.1	482	28	2.13	0.35	-0.0026	0.0053	31.1	1.5	0.065	0.032	0.88	0.16	1.45	0.46	0.76	0.14	9.6	1.6	2.95	0.32	38.2	2.4	14.44	0.69	74.4	4.9
nav15_14_112	377	229.8	0.5826	0.0054	0.07467	0.00064	0.82851	0.05658	0.00031	0.1939	466	3.5	464.2	3.8	475	12	0.996137	0.609549	464.2	3.8		3.8	1.7	430	17	2.01	0.19	0.082	0.078	24.2	1.1	0.045	0.021	0.67	0.23	1.29	0.42	0.575	0.089	7.7	1	2.5	0.26	33.2	1.9	13.66	0.78	68.8	2.6
nav15_14_123	389	250.7	0.5762	0.0073	0.07472	0.00095	0.92709	0.05606	0.00028	0.1372	461.9	4.7	464.5	5.7	454	11	1.00563	0.644473	464.5	5.7		5.1	1.8	752	40	1.61	0.18	0.003	0.086	27.12	0.93	0.091	0.022	1.93	0.48	4.13	0.95	1.31	0.22	16.1	1.8	4.82	0.43	65	4.3	24.6	1.3	122.5	8
nav15_14_145	375	189.4	0.5776	0.0065	0.07472	0.00084	0.88732	0.05602	0.00029	0.098128	462.9	4.2	464.5	5.1	455	12	1.00346	0.505067	464.5	5.1		5.6	1.8	615	36	2.51	0.26	0.078	0.05	25.8	1.5	0.034	0.024	0.52	0.12	1.88	0.36	0.73	0.14	7.9	1.1	2.81	0.24	43.7	3.4	18.6	1.4	96.1	6
nav15_14_97	237	132.6	0.5758	0.0068	0.07473	0.00068	0.80626	0.05617	0.00037	0.0061405	461.6	4.4	464.6	4.1	458	15	1.0065	0.559494	464.6	4.1		4.7	1.9	396	20	1.34	0.21	-0.041	0.04	18.4	1.1	0.03	0.02	0.77	0.26	1.31	0.31	0.57	0.12	8.01	0.87	2.26	0.26	28.5	2.1	12.2	0.79	61.2	4.2
nav15_14_38	408	225	0.582	0.0053	0.07477	0.00063	0.85584	0.05657	0.00029	0.31098	465.7	3.4	464.8	3.8	474	11	0.998067	0.551471	464.8	3.8		6.1	1.7	693	38	1.93	0.26	-0.018	0.01	25.8	1.9	0.036	0.024	1.32	0.17	2.13	0.37	0.97	0.18	11.74	0.98	4.17	0.5	47.8	4.6	19.7	1.3	108.3	6.7
nav15_14_72	438	292.5	0.5928	0.0067	0.07479	0.00071	0.87419	0.05734	0.00032	0.12018	472.6	4.3	464.9	4.3	504	12	0.983707	0.667808	464.9	4.3		5.8	1.5	511	33	1.57	0.21	-1	0.32	30	2	0.55	0.17	3.52	0.77	3.19	0.64	1.35	0.35	11.7	1.6	4.11	0.64	46.5	5.2	16.8	1.4	77.4	4.2
nav15_14_12	332	170.9	0.5833	0.0044	0.07482	0.00043	0.7152	0.05637	0.00035	-0.091626	466.6	2.8	465.1	2.6	467	14	0.996785	0.514759	465.1	2.6		6.3	1.7	343	17	1.25	0.19	-0.0151	0.0096	20.12	0.95	0.06	0.026	0.61	0.22	1.31	0.49	0.66	0.15	6.74	0.82	2.23	0.22	27.3	2	10.5	0.62	55.2	2.2
nav15_14_109	324	165	0.5759	0.0063	0.07482	0.00075	0.89117	0.05629	0.0003	0.15152	461.8	4.1	465.1	4.5	463	12	1.00715	0.509259	465.1	4.5		4.8	1.4	363	14	1.55	0.15	-0.023	0.088	23.08	0.97	0.042	0.015	0.53	0.19	0.94	0.29	0.43	0.083	6.1	1	1.98	0.23	27	2.3	10.94	0.71	58.7	2.2
nav15_14_114	292	165.8	0.5747	0.007	0.07484	0.00075	0.8586	0.05606	0.00033	0.1072	460.9	4.5	465.2	4.5	454	13	1.00933	0.567808	465.2	4.5		6.2	1.7	862	45	2.78	0.4	-1.3	1.2	25.6	1.1	0.066	0.022	1.5	0.51	2.39	0.62	0.73	0.16	13.2	2.1	4.87	0.48	61.9	4.9	25.1	1.2	130.8	5
nav15_14_124	256	129.9	0.5956	0.0092	0.07487	0.00079	0.7442	0.05781	0.00046	-0.068418	474.3	5.8	465.4	4.8	525	18	0.981236	0.507422	465.4	4.8		5.9	1.6	382	16	1.55	0.19	380	160	136	49	9	3.6	38	15	7.1	2.6	1.15	0.28	9.1	1.8	2.32	0.27	29.6	2.2	11.18	0.78	58.3	2.7
nav15_14_150	338.4	172.4	0.5769	0.0057	0.07486	0.00065	0.91029	0.05597	0.00023	0.012245	462.4	3.7	465.4	3.9	452.4	9	1.00649	0.509456	465.4	3.9		6.6	1.4	534	14	1.97	0.26	0.023	0.025	22.44	0.84	0.051	0.026	0.9	0.19	1.47	0.36	0.79	0.19	8.59	0.92	2.96	0.29	37	2.2	16.73	0.89	84.5	3.6
nav15_14_11	443	217.1	0.5791	0.0036	0.07489	0.00043	0.7504	0.05626	0.00023	0.098823	463.9	2.3	465.5	2.6	462.3	9.2	1.00345	0.490068	465.5	2.6		5.6	1.7	691	25	3.83	0.42	-0.037	0.012	34.3	2	0.285	0.086	1.81	0.48	3.54	0.75	1.5	0.23	12.9	1.7	4.34	0.36	51	3.2	20.9	1.3	105.2	4
nav15_14_13	413	259.4	0.5754	0.0042	0.07489	0.00045	0.78989	0.05579	0.00027	0.19407	461.5	2.7	465.5	2.7	444	11	1.00867	0.628087	465.5	2.7		3.7	1.6	796	29	1.98	0.3	-0.031	0.017	29.1	1.9	0.416	0.096	2.62	0.58	3.17	0.67	1.89	0.29	17.5	1.7	5.51	0.33	61.8	3.2	25.3	1	122.4	5.7
nav15_14_178	420	220.3	0.5842	0.0067	0.07488	0.00063	0.8773	0.05635	0.00029	-0.30266	467.1	4.3	465.5	3.8	466	11	0.996575	0.524524	465.5	3.8		1.1	1.7	457	15	1.4	0.16	-0.26	0.15	28.3	1.7	0.062	0.03	1.13	0.26	1.19	0.36	0.67	0.11	8.4	0.84	2.71	0.35	33.3	1.9	14.6	0.94	69.2	2.8
nav15_14_41	343	223	0.5845	0.0083	0.0749	0.0011	0.91012	0.05604	0.00032	0.16268	467.2	5.3	465.6	6.5	453	13	0.996575	0.650146	465.6	6.5		2.1	1.3	724	88	0.97	0.22	0.0027	0.0087	21.4	1.8	0.187	0.049	2.6	0.57	4.44	0.89	1.74	0.34	20.3	2.8	5.71	0.66	61.8	7.3	23.9	2.7	108	12
nav15_14_155	320	144.7	0.5768	0.0065	0.07491	0.00076	0.87428	0.05614	0.00028	0.082645	462.3	4.2	465.6	4.5	457	11	1.00714	0.452187	465.6	4.5		3	0.97	545	19	2.44	0.32	0.017	0.017	21.57	0.63	0.075	0.032	1	0.26	1.41	0.45	0.8	0.12	8.73	0.93	2.83	0.33	39.4	3	15.77	0.69	82.6	2.6
nav15_14_167	359	181	0.5795	0.0071	0.0749	0.00078	0.91411	0.0565	0.00028	-0.062136	464	4.5	465.6	4.7	472	11	1.00345	0.504178	465.6	4.7		4.9	1.5	444	13	1.69	0.25	-0.008	0.013	23.4	1	0.053	0.032	0.43	0.16	1.34	0.33	0.75	0.13	7.4	1.1	2.58	0.22	32.4	1.7	13.55	0.57	69.5	3.1
nav15_14_91	416	255.7	0.5822	0.0066	0.07496	0.00077	0.89204	0.05648	0.00029	-0.041105	465.8	4.2	465.9	4.6	471	11	1.00021	0.614663	465.9	4.6		4.5	1.6	444	17	1.98	0.34	-0.032	0.024	28.4	1.6	0.043	0.021	0.72	0.25	1.65	0.47	0.62	0.13	7.85	0.92	2.68	0.31	31.6	2.3	14.35	0.73	66.3	2.6
nav15_14_117	130.1	100.5	0.5799	0.0077	0.07497	0.00073	0.74069	0.05643	0.00046	0.05071	464.3	5	466	4.4	468	18	1.00366	0.772483	466	4.4		18.1	1.9	498	37	1.64	0.26	-0.8	3.5	24.4	1.3	0.109	0.034	1.97	0.35	4.28	0.64	0.91	0.18	16	2.1	4.47	0.4	47.9	5.4	17	1.4	68	6.3
nav15_14_181	329	148.6	0.5815	0.0058	0.07497	0.00052	0.83476	0.05607	0.00031	-0.23598	465.3	3.7	466	3.1	455	12	1.0015	0.451672	466	3.1		4.9	1.9	486	22	1.32	0.22	-0.03	0.089	18.4	1.1	0.058	0.024	0.77	0.21	1.62	0.27	0.69	0.17	8	1.4	2.59	0.32	36.4	2.5	15.6	1	79.7	5
nav15_14_81	381	227.4	0.5803	0.0056	0.075	0.00058	0.8572	0.05639	0.00027	0.068897	464.6	3.6	466.2	3.5	467	11	1.00344	0.59685	466.2	3.5		5.2	1.5	391	15	1.62	0.25	-0.018	0.016	23.5	1.2	0.036	0.016	0.71	0.23	1.27	0.29	0.64	0.12	7.7	1.1	2.35	0.23	30.1	2.6	12.05	0.59	62.6	2.8
nav15_14_134	366	224.7	0.5804	0.0064	0.07502	0.00074	0.92878	0.05611	0.00022	0.10199	464.6	4.1	466.3	4.4	456.3	8.8	1.00366	0.613934	466.3	4.4		5.1	1.5	799	30	4.63	0.44	0.096	0.052	33.7	2.1	0.087	0.036	1.21	0.33	3.29	0.59	1.03	0.14	17.1	1.8	4.81	0.39	63.7	2.9	24.9	1.7	117.7	5.2
nav15_14_96	395	451	0.581	0.008	0.07504	0.00093	0.94976	0.05634	0.00025	-0.15314	465	5.1	466.4	5.6	465.6	9.9	1.00301	1.14177	466.4	5.6		24.4	3.2	1453	70	3.25	0.44	-5.9	2.2	46.4	1.7	1.35	0.27	14	1.6	13.4	1.3	3.37	0.28	55.7	3.7	15.4	1.3	142	10	49.9	2.9	185	12
nav15_14_42	452	267.1	0.5823	0.0053	0.07508	0.00061	0.90694	0.05601	0.00022	-0.046671	465.9	3.4	466.7	3.7	454.3	8.3	1.00172	0.590929	466.7	3.7		3.9	1.4	561	25	2.03	0.32	-0.039	0.016	30.8	1.5	0.065	0.024	0.84	0.3	1.73	0.37	0.78	0.15	8.5	1.3	3.36	0.35	39.4	1.9	17.26	0.97	85	4.9
nav15_14_92	374	216.9	0.581	0.0046	0.07509	0.00059	0.89121	0.05632	0.00023	0.27032	465.1	3	466.7	3.5	464.9	9.1	1.00344	0.579947	466.7	3.5		5.7	2.3	687	29	2.99	0.38	0.013	0.019	27.7	1.5	0.085	0.024	0.87	0.26	1.83	0.48	0.84	0.15	11.5	1.3	3.57	0.23	43	2.4	20.08	0.87	108.2	4.7
nav15_14_120	211.7	89.44	0.5828	0.0084	0.07511	0.00095	0.8743	0.05614	0.00041	0.017405	466.1	5.4	466.9	5.7	457	16	1.00172	0.422485	466.9	5.7		5.5	1.6	366	17	1.6	0.27	0.12	0.41	14.66	0.76	0.019	0.013	0.54	0.21	1.38	0.41	0.51	0.12	6.3	1	2.07	0.25	28	2.5	10.96	0.48	56.3	2.8
nav15_14_113	507	332	0.5833	0.0092	0.0751	0.0011	0.97433	0.05625	0.0002	-0.2215	467.5	5.6	467	6.8	462.2	7.8	0.99893	0.654832	467	6.8		5.8	1.4	606	52	3.27	0.4	0.031	0.077	33.8	3.4	0.029	0.02	0.88	0.23	1.97	0.6	0.8	0.15	10.7	1.9	3.46	0.47	43.6	4.4	18.4	1.8	92.9	7.9
nav15_14_21	515	375.2	0.5843	0.0045	0.07515	0.00054	0.90127	0.05625	0.00021	0.12556	467.2	2.9	467.1	3.3	461.9	8.4	0.999786	0.728544	467.1	3.3		6.5	2.4	623	31	2.23	0.29	-0.071	0.029	31.3	2	0.371	0.074	2.46	0.45	4.51	0.97	1.67	0.25	16.4	2.3	5.22	0.51	53.6	3.6	18.81	0.86	91.9	3.7
nav15_14_10	443	253.8	0.5858	0.0039	0.07522	0.00042	0.82108	0.05652	0.00022	0.04713	468.1	2.5	467.5	2.5	472.7	8.5	0.998718	0.572912	467.5	2.5		5.4	1.8	437	19	2	0.23	-0.0035	0.0032	26.76	0.93	0.047	0.02	0.73	0.2	1.31	0.39	0.56	0.12	7.16	0.94	2.49	0.22	32.1	1.9	13.08	0.71	70.2	3.2
nav15_14_15	676	542	0.5849	0.004	0.07533	0.0004	0.91078	0.05631	0.00023	0.060919	468.1	2.7	468.2	2.4	466	8.5	1.00021	0.801775	468.2	2.4		9.6	1.8	2345	88	5.71	0.52	-0.0014	0.005	61.6	2.3	0.237	0.039	3.19	0.44	7.41	0.8	3.63	0.39	49.7	3.6	17.2	1.3	213	12	75.9	3	349	15
nav15_14_45	311	161	0.5851	0.0078	0.07535	0.00096	0.91507	0.05598	0.0003	0.20414	467.6	5	468.3	5.8	451	12	1.0015	0.517685	468.3	5.8		5.9	1.9	521	72	2.16	0.42	-0.097	0.045	25.6	3.6	0.28	0.13	2.13	0.88	2.17	0.6	1.02	0.39	9	2.3	3.26	0.64	34.1	5.4	15.5	2	83	12
nav15_14_86	355	195.4	0.5991	0.0062	0.07564	0.00065	0.88147	0.05724	0.00028	-0.023152	476.6	3.9	470.1	3.9	501	11	0.986362	0.550423	470.1	3.9		4.8	1.3	404	17	1.44	0.16	-58	11	103	15	6.8	1.1	25.4	4.1	4.32	0.47	1.15	0.15	9.12	0.93	2.74	0.28	30.8	1.6	11.59	0.69	58.5	3.2
nav15_14_137	506	278.5	0.5872	0.0049	0.07566	0.00062	0.92906	0.05624	0.00019	-0.0020768	469	3.1	470.2	3.7	461.8	7.5	1.00256	0.550395	470.2	3.7		4.1	1.7	520	16	2.24	0.28	0.032	0.024	33.6	1.6	0.064	0.027	0.78	0.19	1.59	0.23	0.77	0.13	8.16	0.89	2.98	0.3	38.9	2.1	16.02	0.99	80.9	3.4
nav15_14_64	256.5	137.9	0.5875	0.0066	0.07571	0.00055	0.74324	0.05595	0.00038	0.046651	469.2	4.2	470.5	3.3	450	15	1.00277	0.537622	470.5	3.3		5.5	1.3	324	11	1.22	0.19	-1.76	0.67	22.4	1.9	0.39	0.17	1.76	0.57	1	0.28	0.47	0.13	5.55	0.86	1.7	0.19	24.2	1.7	9.45	0.51	53.4	2.6
nav15_14_126	239	149.1	0.5839	0.0076	0.07571	0.00078	0.89454	0.05582	0.00032	-0.064645	466.8	4.9	470.5	4.7	445	13	1.00793	0.623849	470.5	4.7		5.6	1.8	486	20	2.06	0.22	0.057	0.065	31.9	1.4	0.079	0.023	1.03	0.2	2.69	0.59	0.7	0.1	10.5	1.5	3.66	0.33	45	3.4	15.59	0.9	70.5	3.7
nav15_14_93	289	135.6	0.5882	0.0062	0.07582	0.00071	0.89875	0.05632	0.00036	0.024562	469.7	4	471.1	4.2	464	14	1.00298	0.469204	471.1	4.2		3.8	1.2	473	17	1.48	0.22	-0.028	0.034	17.93	0.98	0.028	0.017	0.47	0.2	0.95	0.21	0.6	0.12	7.16	0.93	2.79	0.25	31.5	2.5	14.54	0.81	71.5	3.1
nav15_14_99	345	186	0.5824	0.006	0.07591	0.00067	0.93921	0.05592	0.00023	-0.045641	466	3.9	471.6	4	448.8	9.3	1.01202	0.53913	471.6	4		4.3	1.5	549	26	2.91	0.42	-0.48	0.14	25.8	1.1	0.062	0.021	0.68	0.19	0.95	0.28	0.66	0.13	10	1.2	3.48	0.3	36.6	2.4	17.2	1.2	87.6	4.4
nav15_14_165	313	164.5	0.586	0.0072	0.07606	0.00081	0.90266	0.05609	0.0003	-0.057508	468.2	4.6	472.5	4.8	458	12	1.00918	0.525559	472.5	4.8		3.9	1.3	438	17	1.49	0.2	-0.029	0.011	20.49	0.79	0.065	0.031	0.98	0.22	1.22	0.29	0.6	0.2	7.82	0.83	2.27	0.31	30.3	2	13.13	0.69	65	3.5
nav15_14_170	353	211.3	0.5869	0.0078	0.076	0.0011	0.93489	0.05635	0.00029	0.21644	468.7	5	472.5	6.4	468	11	1.00811	0.598584	472.5	6.4		5.5	1.2	461	21	2.46	0.26	0.026	0.018	27.11	0.93	0.098	0.039	0.88	0.36	1.66	0.28	0.75	0.13	9.2	1.1	2.88	0.29	34.9	2.1	15.3	0.87	69.7	2.8
nav15_14_90	368	269.9	0.6373	0.009	0.07616	0.00067	0.84925	0.06038	0.00052	-0.15558	500.5	5.6	473.1	4	619	19	0.945255	0.733424	473.1	4		12.4	2	1749	60	4.52	0.36	-0.102	0.044	56.9	3.1	0.188	0.039	3.38	0.36	6.39	0.85	2.78	0.36	37	2.6	12.48	0.72	142.6	8.4	55.9	2	246.8	8.8
nav15_14_103	149	73.4	0.5881	0.007	0.07616	0.00084	0.81193	0.05607	0.00038	0.08279	469.5	4.5	473.1	5.1	455	15	1.00767	0.492617	473.1	5.1		5.7	2.2	337	19	0.78	0.1	-0.32	0.13	12.65	0.89	0.171	0.037	1.91	0.59	2.38	0.56	1.14	0.25	11	1.7	3.22	0.28	32.1	2.4	10.78	0.86	42.5	2.2
nav15_14_180	288	138.3	0.5949	0.0064	0.07626	0.00068	0.84864	0.05641	0.00032	0.023457	473.9	4.1	473.8	4.1	468	13	0.999789	0.480208	473.8	4.1		4.6	2	463	17	1.97	0.31	-1.7	2.6	19.6	1.6	0.069	0.083	1.22	0.68	1.59	0.42	0.78	0.13	7.38	0.9	2.85	0.3	34.9	2.5	14.17	0.94	69.6	3.3
nav15_14_177	280	153.9	0.6115	0.0066	0.07657	0.0005	0.52833	0.05781	0.00056	0.10225	484.4	4.1	475.6	3	521	21	0.981833	0.549643	475.6	3		4	1.9	323	13	1.34	0.18	-217	61	102	26	6	1.7	31.6	8.3	5.4	1.4	1.44	0.36	9.4	1.2	2.42	0.33	24.7	2.4	9.96	0.61	46.1	2.9
lead loss likely
nav15_14_66	500	513.4	0.4909	0.0054	0.05999	0.00072	0.9027	0.0592	0.0003	0.46571	405.5	3.7	375.6	4.4	574	11	0.926264	1.0268	375.6	4.4		14.3	2.8	1723	78	2.21	0.29	-3.15	0.29	58.4	2.9	4.71	0.35	32	2.3	26.8	1.9	19	1.3	87.4	6.5	26.4	1.3	229	17	56.9	3.8	211	14
nav15_14_182	449	383	0.496	0.013	0.0636	0.0016	0.97691	0.05633	0.00033	-0.10536	408.4	9	397.4	9.6	465	13	0.973066	0.853007	397.4	9.6		11.7	3.4	1440	190	1.87	0.26	-13.4	2.2	41.1	3.9	1.93	0.24	18.1	3	19.3	2.8	12.7	2.2	66	11	16.8	2.7	157	20	43	5	165	19
nav15_14_121	520	423	0.5465	0.0065	0.06671	0.00082	0.71157	0.05905	0.00051	0.45651	442.6	4.3	416.3	5	568	18	0.940578	0.813462	416.3	5		10.6	1.7	1182	88	2.4	0.34	12.1	1.9	38.2	2	1.25	0.15	10.4	1.4	17.2	2.8	9.5	1.2	46.7	4.7	14.1	1.4	133	15	38.6	2.6	151.2	7.9
nav15_14_7	550	373.4	0.5352	0.0038	0.06876	0.00046	0.88579	0.05655	0.00021	-0.11939	435.2	2.5	428.7	2.8	473.8	8.1	0.985064	0.678909	428.7	2.8		4.7	1.4	742	26	2.27	0.28	-0.307	0.044	38.4	1.6	1.43	0.2	7.27	0.84	8.67	0.86	5.78	0.68	30	2.9	8.43	0.69	79.9	4.6	24.2	1.7	101.7	3.9
nav15_14_157	410	246.6	0.5781	0.0064	0.06942	0.00056	0.79843	0.06047	0.00044	-0.12419	463.2	4.1	432.6	3.4	620	16	0.933938	0.601463	432.6	3.4		6.4	0.97	691	27	2.45	0.36	0.27	0.054	28	1.6	0.56	0.12	3.32	0.52	5.45	0.76	3.16	0.36	21.5	2	6.6	0.48	69.6	4.1	21.9	1.2	94.6	4.8
nav15_14_50	466	429	0.547	0.0095	0.0695	0.0015	0.95233	0.05709	0.00036	0.51255	442.8	6.2	433.3	9.1	494	14	0.978546	0.920601	433.3	9.1		9.6	2.3	1310	300	1.82	0.27	-0.78	0.4	43.8	9.3	2.07	0.94	14.8	6.2	15.3	6	9.2	3.4	51	16	16.5	5.7	144	41	47	12	193	40
nav15_14_51	527	452.2	0.5458	0.005	0.06993	0.00055	0.89308	0.0563	0.00026	-0.11171	442.2	3.3	435.8	3.3	464	10	0.985527	0.858065	435.8	3.3		7.9	2.5	929	54	2.32	0.22	-0.514	0.051	42.3	1.7	1.28	0.13	9.12	0.98	10.6	1.3	6.2	0.63	35.1	2.9	10.17	0.9	97.3	6.5	30.8	1.7	130.1	7.3
nav15_14_119	662	556	0.547	0.017	0.0702	0.0023	0.98775	0.05664	0.0003	0.25847	442	11	437	14	479	12	0.988688	0.839879	437	14		7.5	3	1840	470	3.06	0.39	57	35	68	13	2.7	1.5	21	11	23	11	10.7	5.2	66	24	21	7.7	204	63	63	16	263	54
nav15_14_127	457	263.9	0.5479	0.0063	0.07023	0.00077	0.96183	0.0564	0.00018	0.05643	443.6	4.1	437.5	4.7	468	7	0.986249	0.577462	437.5	4.7		6.4	1.3	988	33	3.76	0.34	5.81	0.7	41.4	2	1.7	0.14	9.7	1.2	11.4	1.1	5.36	0.51	30.8	2.7	9.77	0.77	99.2	5.9	31.1	1.5	148.9	8.1
nav15_14_158	647	412.9	0.543	0.0046	0.07032	0.00054	0.88775	0.05618	0.00026	-0.019028	440.3	3	438.1	3.3	459	10	0.995003	0.638176	438.1	3.3		10	1.4	1104	47	4.57	0.49	1.37	0.12	52.5	2.6	2.57	0.32	12.9	1	8.18	0.85	4.89	0.37	30.3	2.7	9.6	0.81	103.2	5.9	36	2.7	163.8	9.8
nav15_14_159	546	321.2	0.5452	0.0067	0.07047	0.00069	0.93773	0.0563	0.00026	-0.30228	441.7	4.4	438.9	4.1	464	10	0.993661	0.588278	438.9	4.1		6.1	1.3	926	37	3.45	0.39	0.95	0.12	42.6	1.6	1.37	0.23	6.9	1.2	5.76	0.84	4.12	0.42	24.1	1.9	7.3	0.53	79	4.3	28	1.4	133.3	5.6
nav15_14_47	416	296.6	0.5607	0.0076	0.07048	0.0008	0.92905	0.057	0.00028	-0.16512	451.8	4.9	439	4.8	491	11	0.971669	0.712981	439	4.8		6.9	1.8	783	38	2.12	0.31	-0.434	0.092	34.9	2.4	1.013	0.091	6.51	0.72	6.61	0.79	3.5	0.43	24.4	2.4	7.42	0.52	69.1	3.8	25.3	1.9	111.6	7.8
nav15_14_164	387	308.3	0.5512	0.0072	0.07099	0.00081	0.92369	0.05647	0.0003	-0.066561	445.7	4.7	442.1	4.9	470	12	0.991923	0.796641	442.1	4.9		6.4	1.3	967	36	1.35	0.18	0.69	0.17	33.6	2.6	2.18	0.55	9.4	1.6	6.3	1.1	4.16	0.74	25	3	7.84	0.8	88.7	7.5	31.7	2.1	139.8	8.5
nav15_14_106	540	350	0.554	0.0059	0.07124	0.00057	0.90981	0.05665	0.0003	-0.23411	447.6	3.8	443.6	3.4	478	12	0.991063	0.648148	443.6	3.4		7.7	2.2	957	38	4.28	0.4	-3.06	0.49	45.6	1.9	0.92	0.21	7.2	1	5.54	0.58	3.06	0.35	23.9	2.2	7.27	0.79	84.8	5.1	30.6	1.8	144.3	6.6
discordant
nav15_14_3	639	444.3	0.76	0.021	0.06887	0.00051	0.030357	0.0801	0.0024	0.24258	575	12	429.3	3.1	1189	60	0.746609	0.695305	429.3	3.1		69	38	1580	69	6.22	0.71	-1.21	0.76	59.5	4.5	2.2	0.54	12.3	2.1	16.8	1.8	10	0.92	58.6	3.6	16.01	0.93	167	10	51	3.6	205	11
nav15_14_179	355	496	0.839	0.072	0.07089	0.00079	-0.19994	0.086	0.0077	0.33402	611	38	441.5	4.7	1250	160	0.722586	1.39718	441.5	4.7		9.1	4.2	1270	220	1.39	0.22	-7.4	1.5	38.4	2.1	2.04	0.3	17.3	2.4	16.9	3.2	9.1	2.2	51	12	15.5	3.5	143	28	45.2	9.2	163	25
nav15_14_166	567	508	0.599	0.018	0.06634	0.0007	0.41082	0.0654	0.0017	-0.020606	476	12	414.1	4.3	777	54	0.869958	0.895944	414.1	4.3		12.6	2.2	1582	86	2.39	0.23	1.5	0.15	46.2	1.6	3.6	0.24	17.7	1.2	16	1.5	12.76	0.5	60.4	3.8	17.23	0.96	181.3	7.8	54.6	2.6	217	12
nav15_14_4	429	274.6	0.6492	0.007	0.07233	0.00058	0.75862	0.06557	0.00052	-0.082586	507.9	4.3	450.2	3.5	792	17	0.886395	0.640093	450.2	3.5		6.8	1.5	500	19	1.64	0.32	-0.114	0.029	26.9	1.4	0.75	0.1	3.08	0.49	3.64	0.57	2.32	0.38	14.2	1.5	4.31	0.42	50	2.9	15.75	0.85	72.3	3.6
nav15_14_16	110.4	77.21	0.745	0.011	0.07682	0.00063	0.52806	0.06982	0.0009	0.020508	565	6.4	477.1	3.8	925	27	0.844425	0.699366	477.1	3.8		57	21	395	12	1.82	0.24	-0.671	0.075	20.6	1.2	0.54	0.11	2.62	0.46	3.62	0.52	1.13	0.19	12.3	1.5	3.45	0.26	37.5	2	13.08	0.7	58.3	2.8
nav15_14_36	601	546	2.42	0.082	0.07902	0.00098	0.18689	0.2231	0.007	0.16025	1245	26	490.2	5.9	2993	57	0.393735	0.908486	490.2	5.9		15.4	2.8	1560	180	2.35	0.3	-1.7	0.26	63.8	6.5	5.96	0.92	31	5.3	29.2	5.8	14.8	2.9	83	12	23.5	3.4	192	26	56	8.2	199	18
	U-Pb and trace element analyses were calibrated using 91500 (1062.4 ± 0.4 Ma; Wiedenbeck et al., 1995) and GJ-1 zircon (601.9 ± 0.7 Ma; Horstwood et al., 2016) as primary standards between every eight unknown samples, and by the Plesovice zircon (337.71 ± 0.37 Ma; Sláma et al., 2008) as the secondary standard at the beginning and end of each run; our values were within 0.5 - 1.5% of the published…
[truncated: 10 more columns]
